# Supplementary material
Source: PubMed Central journal article supplement (PMC2881676)
Supplement: NIHMS4357-supplement-s1.pdf [file NIHMS4357-supplement-s1.pdf]

# Common DNA Sequence Variants at Thirty Genetic Loci Contribute to Polygenic Dyslipidemia

## Supplementary Materials

Sekar Kathiresan<sup>1,2,3,4,5,37</sup>, Cristen J. Willer<sup>6,37</sup>, Gina Peloso<sup>4,7,37</sup>, Serkalem Demissie<sup>4,7,37</sup>, Kiran Musunuru<sup>1,2</sup>, Eric Schadt<sup>8</sup>, Lee Kaplan<sup>9</sup>, Derrick Bennett<sup>10</sup>, Yun Li<sup>6</sup>, Toshiko Tanaka<sup>11</sup>, Benjamin F. Voight<sup>2,3,12</sup>, Lori L. Bonnycastle<sup>13</sup>, Anne U. Jackson<sup>6</sup>, Gabriel Crawford<sup>3</sup>, Aarti Surti<sup>3</sup>, Candace Guiducci<sup>3</sup>, Noel Burt<sup>3</sup>, Sarah Parish<sup>10</sup>, Robert Clarke<sup>10</sup>, Diana Zelenika<sup>14</sup>, Kari A. Kubalanza<sup>13</sup>, Mario A. Morken<sup>13</sup>, Laura J. Scott<sup>6</sup>, Heather M. Stringham<sup>6</sup>, Pilar Galan<sup>15</sup>, Amy J. Swift<sup>13</sup>, Johanna Kuusisto<sup>16</sup>, Richard N. Bergman<sup>17</sup>, Jouko Sundvall<sup>18</sup>, Markku Laakso<sup>16</sup>, Luigi Ferrucci<sup>11</sup>, Paul Scheet<sup>6</sup>, Serena Sanna<sup>19</sup>, Manuela Uda<sup>19</sup>, Qiong Yang<sup>4,7</sup>, Kathryn Lunetta<sup>4,7</sup>, Josee Dupuis<sup>4,7</sup>, Paul I. deBakker<sup>20</sup>, Christopher J. O'Donnell<sup>4,21</sup>, John C. Chambers<sup>22</sup>, Jaspal S. Kooner<sup>23</sup>, Serge Hercberg<sup>15</sup>, Pierre Meneton<sup>24</sup>, Edward G. Lakatta<sup>25</sup>, Angelo Scuteri<sup>26</sup>, David Schlessinger<sup>27</sup>, Jaakko Tuomilehto<sup>18</sup>, Francis S. Collins<sup>13</sup>, Leif Groop<sup>28,29</sup>, David Altshuler<sup>3,5,12,30</sup>, Rory Collins<sup>10</sup>, G. Mark Lathrop<sup>14</sup>, Olle Melander<sup>31</sup>, Veikko Salomaa<sup>33</sup>, Leena Peltonen<sup>3,33,34</sup>, Marju Orho-Melander<sup>29</sup>, Jose M. Ordovas<sup>35,38</sup>, Michael Boehnke<sup>6,38</sup>, Gonçalo R. Abecasis<sup>6,38</sup>, Karen L. Mohlke<sup>36,38</sup>, L. Adrienne Cupples<sup>4,7,38</sup>

<sup>1</sup>Cardiovascular Research Center and Cardiology Division, Massachusetts General Hospital, Boston, Massachusetts 02114, USA

<sup>2</sup>Center for Human Genetic Research, Massachusetts General Hospital, Boston, Massachusetts 02114, USA

<sup>3</sup>Program in Medical and Population Genetics, Broad Institute of Harvard and Massachusetts Institute of Technology, Cambridge, Massachusetts 02142, USA

<sup>4</sup>Framingham Heart Study of the National, Heart, Lung, and Blood Institute and Boston University, Framingham, Massachusetts 01702, USA

<sup>5</sup>Department of Medicine, Harvard Medical School, Boston, Massachusetts 02115, USA

<sup>6</sup>Center for Statistical Genetics, Department of Biostatistics, University of Michigan, Ann Arbor, Michigan 48109, USA

<sup>7</sup>Department of Biostatistics, Boston University School of Public Health, Boston, Massachusetts 02118, USA

<sup>8</sup>Rosetta Inpharmatics, Merck and Co., Inc., Seattle, Washington 98109, USA

<sup>9</sup>Massachusetts General Hospital Weight Center, Boston, Massachusetts 02114, USA

<sup>10</sup>Clinical Trials Service Unit, University of Oxford, Oxford OX3 7LF, UK

<sup>11</sup>Clinical Research Branch, National Institute on Aging, National Institutes of Health, Baltimore, Maryland 21225, USA

<sup>12</sup>Department of Molecular Biology, Massachusetts General Hospital, Boston, Massachusetts 02114, USA

<sup>13</sup>National Human Genome Research Institute, National Institutes of Health, Bethesda, Maryland 20892, USA

<sup>14</sup>Centre Nationale de Genotypage, Institut Genomique, Commissariat a l'Energie Atomique, Evry Cedex 91057, France

<sup>15</sup>INSERM U557, INRA U1125, CNAM, Paris 13 SMBH, Bobigny, France

<sup>16</sup>Department of Medicine, University of Kuopio, Kuopio 70210, Finland

<sup>17</sup>Department of Physiology and Biophysics, University of Southern California Keck School of Medicine, Los Angeles, California 90033, USA

<sup>18</sup>Diabetes Unit, Department of Health Promotion and Chronic Disease Prevention, National Public Health Institute, Helsinki 00300, Finland

<sup>19</sup>Istituto di Neurogenetica e Neurofarmacologia, Consiglio Nazionale delle Ricerche, Cagliari 08045, Italy

<sup>20</sup>Harvard/Partners Center for Genetics and Genomics, Boston, Massachusetts 02115, USA

<sup>21</sup>National, Lung, and Blood Institute, National Institutes of Health, Framingham, Massachusetts 01702, USA

<sup>22</sup>Department of Epidemiology and Public Health, Imperial College London, London W2 1PG, UK

<sup>23</sup>Hammersmith Hospital, National Heart and Lung Institute, Imperial College London, London W12 0NN, UK

<sup>24</sup>INSERM U872, Centre de Recherche des Cordeliers, 75270 Paris cedex 06, France

<sup>25</sup>Laboratory of Cardiovascular Science, Gerontology Research Center, National Institute on Aging, Baltimore, Maryland 21224, USA

<sup>26</sup>Unità Operativa Geriatria, Istituto per la Patologia Endocrina e Metabolica, Rome, Italy

<sup>27</sup>Laboratory of Genetics, Gerontology Research Center, National Institute on Aging, Baltimore, Maryland 21224, USA

<sup>28</sup>Department of Clinical Sciences, Diabetes and Endocrinology, University Hospital Malmö, Lund University, Malmö 20502, Sweden

<sup>29</sup>Department of Medicine, Helsinki University Hospital, Helsinki 00029, Finland

<sup>30</sup>Department of Genetics, Harvard Medical School, Boston, Massachusetts 02115, USA

<sup>31</sup>Department of Clinical Sciences, Hypertension and Cardiovascular Diseases, University Hospital Malmö, Lund University, Malmö 20502, Sweden

<sup>32</sup>Institute for Molecular Medicine, University of Helsinki, Helsinki 00029, Finland

<sup>33</sup>Chronic Disease Epidemiology Unit, Department of Health Promotion and Chronic Disease Prevention, National Public Health Institute, Helsinki 00300, Finland

<sup>34</sup>Wellcome Trust Sanger Institute, Cambridge CB10 1SA, UK

<sup>35</sup>Nutrition and Genomics Laboratory, Jean Mayer United States Department of Agriculture Human Nutrition Research Center on Aging at Tufts University, Boston, Massachusetts 02111, USA

<sup>36</sup>Department of Genetics, University of North Carolina, Chapel Hill, North Carolina 27599, USA

<sup>37</sup>These authors contributed equally to the work.

<sup>38</sup>These authors contributed equally to the work.

Correspondence should be addressed to S.K. ([skathiresan@partners.org](mailto:skathiresan@partners.org)), G.R.A. ([goncalo@umich.edu](mailto:goncalo@umich.edu)), K.L.M. ([mohlke@med.unc.edu](mailto:mohlke@med.unc.edu)), or L.A.C. ([adrienne@bu.edu](mailto:adrienne@bu.edu))

## Supplementary Methods

**Stage 1 study samples, phenotypes, and genotyping.** The FHS is a community-based three-generational prospective cohort study designed to evaluate risk factors for cardiovascular disease. The original cohort of participants was recruited in 1948 from Framingham, USA. The 2<sup>nd</sup> generation cohort (n=5,124, offspring of the original cohort and their spouses) was recruited in 1971-1975 with subsequent follow-up examinations approximately every 4 years. The 3<sup>rd</sup> generation cohort (n=4,095, grand-children of the original cohort) was recruited from 2002-2005 for an initial examination. In the 2<sup>nd</sup> generation cohort, fasting levels of total cholesterol, high-density lipoprotein cholesterol, and triglycerides have been measured using standard enzymatic methods at up to seven time points over ~30 years. For each individual, we analyzed the average of measurements from the seven time points as the primary phenotype. We have previously reported that this average is more heritable than any measure at a single time-point<sup>1</sup>. In the 3<sup>rd</sup> generation cohort, there has been a single measurement of fasting blood lipids and this measure served as the phenotype<sup>2</sup>.

FHS samples were genotyped using the Affymetrix GeneChip Human Mapping 500K Array Set and a supplemental 50K Array Set focused on coding SNPs and SNPs tagging protein-coding genes. We excluded samples with a call frequency <0.97. In total, 432,815 SNPs passed quality control criteria of Hardy-Weinberg equilibrium (HWE)  $P > 10^{-6}$ , call frequency > 0.95, and MAF > 0.01. Across the 2<sup>nd</sup> and 3<sup>rd</sup> generation participants, 7,423 individuals who had successful genotyping and at least one lipoprotein phenotype were included in the Stage 1 GWAS.

The London Life Sciences Population Study (LOLIPOP) is a cohort study of cardiovascular health in men and women aged 35-75 years and registered with family practitioners in West London<sup>3</sup>. Blood was collected after an 8 hour fast for biochemical analysis, including total and HDL cholesterol and triglycerides. 627 individuals of European ancestry were genotyped using the Affymetrix GeneChip Human Mapping 500K Array Set and 423 with a customized

genome-wide array, as previously described<sup>4</sup>. The call frequency of included samples was > 0.95. In total, 374,773 autosomal SNPs passed quality control criteria (HWE  $P > 10^{-6}$ , call frequency > 0.90, and minor allele frequency > 0.01).

The Supplementation en Vitamines et Mineraux Antioxydants (SUVIMAX) study is a randomized, placebo-controlled trial of the health effects of antioxidant vitamins and minerals, with enrollment of 13,017 French adults between 1994 and 2002<sup>5</sup>. Fasting lipid levels were obtained from the baseline examination (prior to randomization) and these values served as the primary phenotype for this investigation. SUVIMAX samples were genotyped using the Illumina 317K array. The call frequency of included samples was > 0.95. In total, 294,882 SNPs passed quality control criteria (HWE  $P > 10^{-6}$ , call frequency > 0.95, and MAF > 0.01). 1,551 individuals who had successful genotyping and at least one lipoprotein phenotype were included in the Stage 1 GWAS.

The Invecchiare in Chianti (InCHIANTI) study is a population-based study of older persons living in Tuscany, Italy<sup>6</sup>. 1,453 persons were enrolled between 1998 and 2000. InCHIANTI samples were genotyped using the Illumina 550K array. The call frequency of included samples was > 0.99. In total, 484,115 autosomal SNPs passed quality control criteria (HWE  $P > 0.0001$ , call frequency > 0.99, and minor allele frequency > 0.01). 1,132 individuals who had successful genotyping and at least one lipoprotein phenotype were included in the Stage 1 GWAS.

In addition to the above four studies, the association results for 8,684 individuals from three previously published GWAS – the Diabetes Genetics Initiative (DGI), the Finland-United States Investigation of NIDDM Genetics (FUSION) study and the SardinIA Study of Aging – were included in Stage 1<sup>7-9</sup>.

In each study, LDL cholesterol was calculated using Friedewald's formula with missing values assigned to individuals with triglycerides > 400 mg/dl. Individuals known to be on lipid-

lowering therapy were excluded from association analysis for LDL cholesterol in all studies except FHS. In FHS, we imputed the untreated LDL cholesterol values using an algorithm described previously<sup>1</sup>.

All participants provided informed consent. Local ethical committees at each participating institution approved the individual study protocols. The institutional review boards at Boston Medical Center, Massachusetts Institute of Technology, and the University of Michigan approved this study.

**Stage 1 imputation.** In each of the seven Stage 1 GWAS, directly genotyped SNPs from the chips and phased chromosomes for 60 HapMap CEU founders were utilized to impute genotypes for ~2.4-2.6 million autosomal SNPs in HapMap with an estimated MAF > 0.01. Imputation was conducted using a Hidden Markov Model algorithm implemented in MACH software<sup>9</sup>.

**Stage 1 meta-analysis for directly genotyped and imputed SNPs.** Using the statistical evidence for each marker from each of seven Stage 1 GWAS, we conducted a fixed-effects meta-analysis using METAL software<sup>9</sup>. For each marker, an arbitrary reference allele was selected and a z-statistic characterizing the evidence for association was used. The z-statistic summarizes the magnitude and the direction of effect relative to the reference allele. An overall z-statistic and P value were then calculated from the weighted sum of the individual study statistics. We used weights proportional to the square-root of the number of individuals examined in each sample and scaled so that the squared weights summed to one.

**Stage 2 study samples, phenotypes, and genotyping.** Replication of promising association signals from Stage 1 was attempted in up to 20,623 independent participants from five studies. We performed follow-up genotyping in 5,519 individuals from the Malmo Diet and Cancer Study –

Cardiovascular Cohort (MDC-CC), a community-based prospective epidemiologic cohort study designed to investigate risk factors for cardiovascular disease<sup>8</sup>. A second replication study consisted of 7,940 individuals from FINRISK97, a population-based cross-sectional survey designed to study the prevalence of cardiovascular risk factors in Finland<sup>8</sup>. A third replication consisted of FUSION Stage 2, an additional 967 Finnish type 2 diabetes cases and 1257 Finnish controls with normal glucose tolerance<sup>9</sup>. The fourth replication study consisted of the METabolic Syndrome In Men (METSIM) study which aims to investigate the metabolic syndrome, type 2 diabetes, cardiovascular disease, and cardiovascular risk factors in men, aged 50-70 years, randomly selected from the population of the town of Kuopio in Eastern Finland (population 95,000). The current sample included 437 T2D cases and 3,327 controls with lipid measurements. Finally, the fifth replication study consisted of cases and controls from the International Study of Infarct Survival (ISIS) in the United Kingdom<sup>10</sup>. The sample included 1,254 cases of non-fatal myocardial infarction and 1,253 controls free of myocardial infarction. Blood samples in ISIS were non-fasting. Plasma concentrations of LDL cholesterol, HDL cholesterol and triglycerides were directly measured. Plasma triglyceride measurements were not available for myocardial infarction cases because of the acute effect of myocardial infarction on triglyceride levels.

**Variance-weighted meta-analysis.** As an additional analysis, we applied a uniform analysis strategy to all sample sets to estimate regression coefficients (measuring association between each SNP and lipid levels) and their corresponding standard errors and combined regression coefficients across samples using an inverse-variance weighted meta-analysis. To accomplish this, we first standardized the exclusion criteria, the phenotype modeling, and the association analysis methodology across Stage 1 and 2 samples. Specifically, we excluded all individuals on lipid lowering therapy. We standardized the phenotype modeling by: 1) calculating residuals after adjustment for age, sex, age<sup>2</sup>, and diabetes status and 2) transforming residuals to ranks and then to

normally distributed z-scores. These inverse-normal transformed residuals served as the phenotype in each study. Next, we conducted linear regression-based analyses in each study to evaluate association between genotypes and phenotypes using an additive genetic model (where appropriate, as in the FHS and SardiNIA samples, we adjusted for relatedness). Finally, we combined the statistical evidence across Stage 1 and Stage 2 studies using a fixed-effects meta-analysis of regression coefficients, weighting by the inverse of the variance in each study. Effect estimates, standard errors, and P values from each individual study as well as the variance-weighted meta-analysis are presented in **Supplementary Tables 3, 4, 5, and 6**. The Stage 1 + 2 effect estimates from the variance-weighted meta-analysis were highly correlated to the effect estimates from the population-based FHS sample presented in Table 2 ( $r=0.97$ , **Supplementary Table 3**). This uniform analysis also enabled us to test for heterogeneity of effects at the 30 confirmed loci. As shown in **Supplementary Tables 4, 5, and 6**, we did not observe convincing evidence for heterogeneity at any of the 30 loci (all  $P > 0.002$ ; Bonferroni corrected for 30 loci).

**Specialized lipoprotein-related phenotypes.** We studied 21 phenotypes measured in the FHS 2<sup>nd</sup> Generation cohort: apo A-I; apo B; apo C-III; apo E; size of LDL, HDL, and VLDL particles measured by nuclear magnetic resonance (NMR) spectroscopy; concentrations of large, intermediate and small HDL particles by NMR; concentrations of large and small LDL particles by NMR; concentrations of large, intermediate, and small VLDL particles by NMR; concentration of intermediate-density lipoprotein (IDL) by NMR; HDL<sub>2</sub> and HDL<sub>3</sub> subfractions; lipoprotein(a); remnant lipoprotein total cholesterol; and remnant lipoprotein triglycerides. The phenotypes were measured at the 3rd, 4th, or 5th examination cycle and were available in 2,629 to 3,628 individuals. Each of the 21 phenotypes was tested for association with index SNPs at 30 loci (SNPs from **Table 2**) and *PCSK9* R46L using residual phenotypes from sex-specific linear regression models accounting for age and age<sup>2</sup>.

**Cis expression quantitative trait locus analyses.** To evaluate whether lipoprotein-associated SNPs also served as eQTLs with putative *cis* regulatory effects on liver gene expression traits, we profiled expression levels of 39,280 transcripts and genotyped 782,476 SNPs in 957 human liver samples. Liver samples were either postmortem or surgical resections from organ donors. The tissue collection, RNA and DNA isolation, expression profiling, and DNA genotyping have been previously described<sup>11</sup>. We studied the correlation of each lipoprotein-associated SNP (or a proxy defined as a SNP with  $r^2 > 0.8$  in HapMap CEU) with all transcripts within 500 kb upstream or downstream of the SNP position.

**Genotype score analysis in FHS.** We modeled the cumulative number of HDL cholesterol-lowering, LDL cholesterol-raising, or triglyceride-raising alleles carried by each participant in the FHS 2<sup>nd</sup> generation. We constructed a score from all 32 SNPs in Table 2. The score was composed of allelic dosage (observed counts of 0, 1, or 2 for genotyped SNPs, or fractional allele counts between 0.0 and 2.0 estimated from the imputation procedure for imputed SNPs), weighted by the effect size of that allele on the lipid phenotype (beta-coefficient from linear regression in the FHS Stage 1 data as shown in **Table 2**), and summed across SNPs. In contrast to simpler scoring systems using integer allele counts without weighting, this method offers the advantage of accounting for low-frequency alleles with larger effect sizes. We determined the mean lipoprotein concentration across deciles of the score in participants attending the fifth examination of FHS 2<sup>nd</sup> generation participants. In addition, we calculated the proportion of individuals who met clinical cutpoints as defined by the U.S. national cholesterol treatment guidelines for low HDL cholesterol (< 40 mg/dl), high LDL cholesterol (> 160 mg/dl), and high triglycerides (> 200 mg/dl)<sup>12</sup>. For individuals on lipid lowering therapy in FHS, we used the imputed untreated values to define high LDL cholesterol. Across deciles of score, we evaluated a test of trend (after adjustment for age and



gender) to assess differences in mean lipid value or proportion exceeding clinical cutpoints. One potential concern is the simultaneous derivation and application of the score in the same sample. However, this concern is mitigated by the fact that the index SNPs were discovered either from earlier GWAS that did not include FHS or only after combining FHS with other Stage 1 and Stage 2 data.

## References

1. Kathiresan, S. et al. A genome-wide association study for blood lipid phenotypes in the Framingham Heart Study. *BMC Med Genet* **8 Suppl 1**, S17 (2007).
2. Splansky, G.L. et al. The Third Generation Cohort of the National Heart, Lung, and Blood Institute's Framingham Heart Study: design, recruitment, and initial examination. *Am J Epidemiol* **165**, 1328-35 (2007).
3. Chambers, J.C. et al. Common genetic variation near MC4R is associated with waist circumference and insulin resistance. *Nat Genet* **40**, 716-8 (2008).
4. Kooner, J.S. et al. Genome-wide scan identifies variation in MLXIPL associated with plasma triglycerides. *Nat Genet* **40**, 149-51 (2008).
5. Hercberg, S. et al. The SU.VI.MAX Study: a randomized, placebo-controlled trial of the health effects of antioxidant vitamins and minerals. *Arch Intern Med* **164**, 2335-42 (2004).
6. Ferrucci, L. et al. Subsystems contributing to the decline in ability to walk: bridging the gap between epidemiology and geriatric practice in the InCHIANTI study. *J Am Geriatr Soc* **48**, 1618-25 (2000).
7. Diabetes Genetics Initiative of Broad Institute of Harvard and MIT, L.U., and Novartis Institutes for BioMedical Research et al. Genome-wide association analysis identifies loci for type 2 diabetes and triglyceride levels. *Science* **316**, 1331-6 (2007).
8. Kathiresan, S. et al. Six new loci associated with blood low-density lipoprotein cholesterol, high-density lipoprotein cholesterol or triglycerides in humans. *Nat Genet* **40**, 189-97 (2008).
9. Willer, C.J. et al. Newly identified loci that influence lipid concentrations and risk of coronary artery disease. *Nat Genet* **40**, 161-9 (2008).
10. ISIS-3: a randomised comparison of streptokinase vs tissue plasminogen activator vs anistreplase and of aspirin plus heparin vs aspirin alone among 41,299 cases of suspected

acute myocardial infarction. ISIS-3 (Third International Study of Infarct Survival) Collaborative Group. *Lancet* **339**, 753-70 (1992).

11. Schadt, E.E. et al. Mapping the genetic architecture of gene expression in human liver. *PLoS Biol* **6**, e107 (2008).
12. Executive Summary of The Third Report of The National Cholesterol Education Program (NCEP) Expert Panel on Detection, Evaluation, And Treatment of High Blood Cholesterol In Adults (Adult Treatment Panel III). *Jama* **285**, 2486-97 (2001).

**Supplementary Figure 1. Study Design**

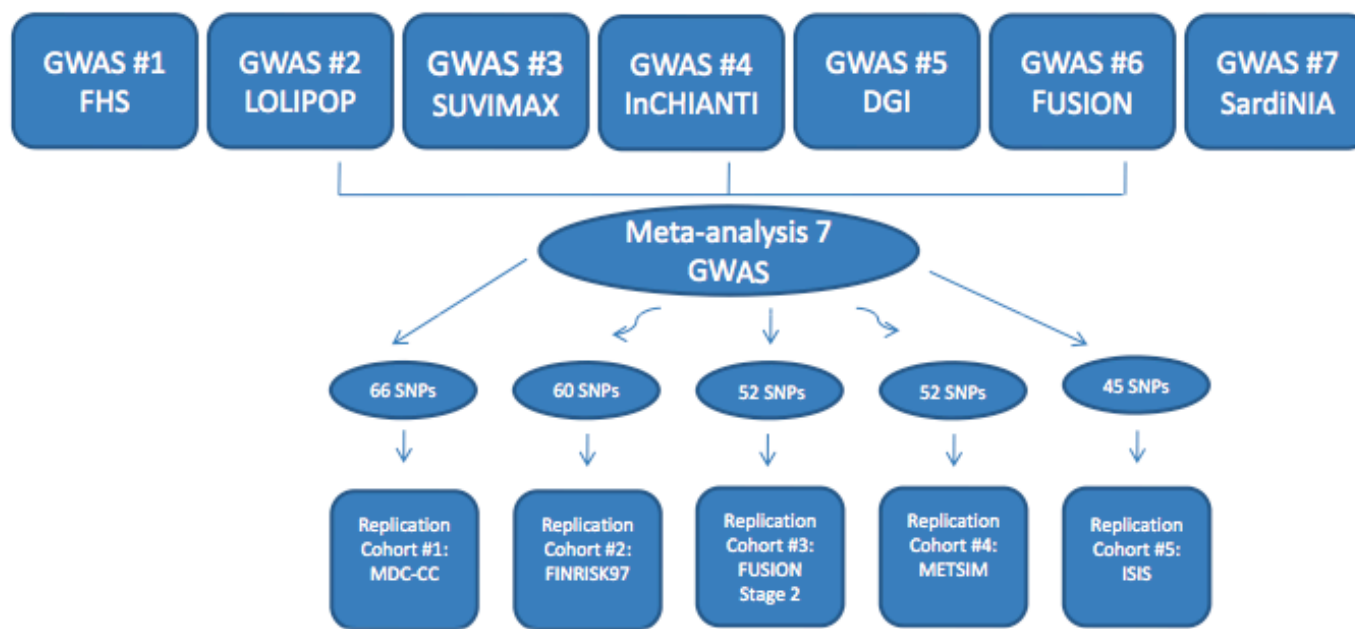

**Supplementary Figure 2. Hierarchical clustering of genotype-phenotype correlations of SNPs with specialized lipid**

**phenotypes.** We present results of two-way hierarchical clustering using uncentered correlation distance and centroid linkage, using the Cluster 3.0 software package (Human Genome Center, University of Tokyo, Japan). Data were visualized using Java TreeView version 1.1.1 (Stanford University School of Medicine, Palo Alto, California). In an initial round of analysis, we computed a T statistic for each SNP-phenotype relationship by dividing the beta-coefficient by the standard error, with the minor allele of the SNP serving as the reference allele. The input dataset for clustering comprised the magnitude and sign of each T statistic, with red representing a positive sign and green a negative sign; the intensity of color corresponded to the magnitude. In subsequent rounds of analysis, we reversed the signs of the T statistic for a given SNP (making the major allele of the SNP the reference allele) as appropriate to improve clustering.

Supplementary Figure 2

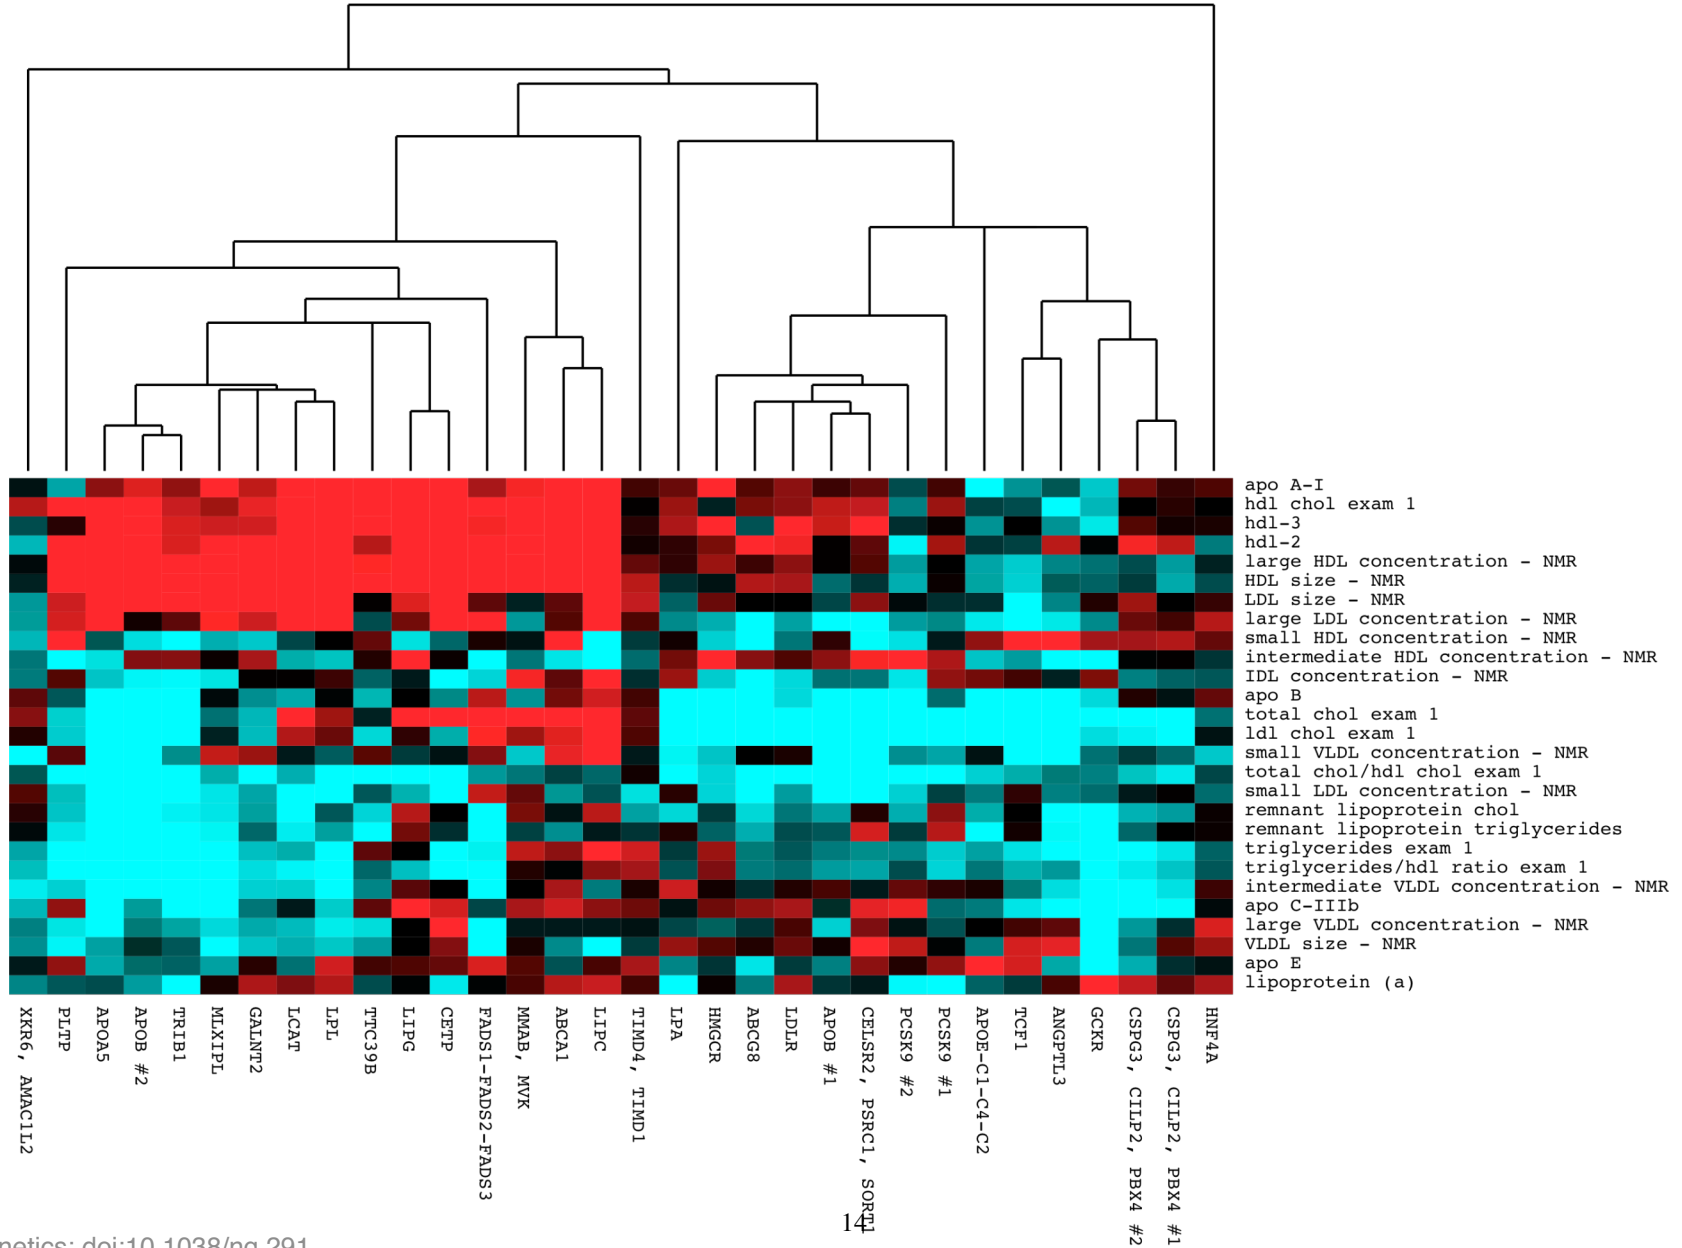

**Supplementary Figure 3. The top two axes of variations in principal components analysis of the Framingham Heart Study genome-wide single nucleotide polymorphism data.** Analyses were conducted using EIGENSTRAT as described in the Methods. Based on self-reported country of origin and religious identity in FHS (data not shown), the two axes correspond to gradients previously reported in American individuals of European ancestry (Northwest, Southeast, and Ashkenazi Jewish).

Supplementary Figure 3

### FHS Sub-structure

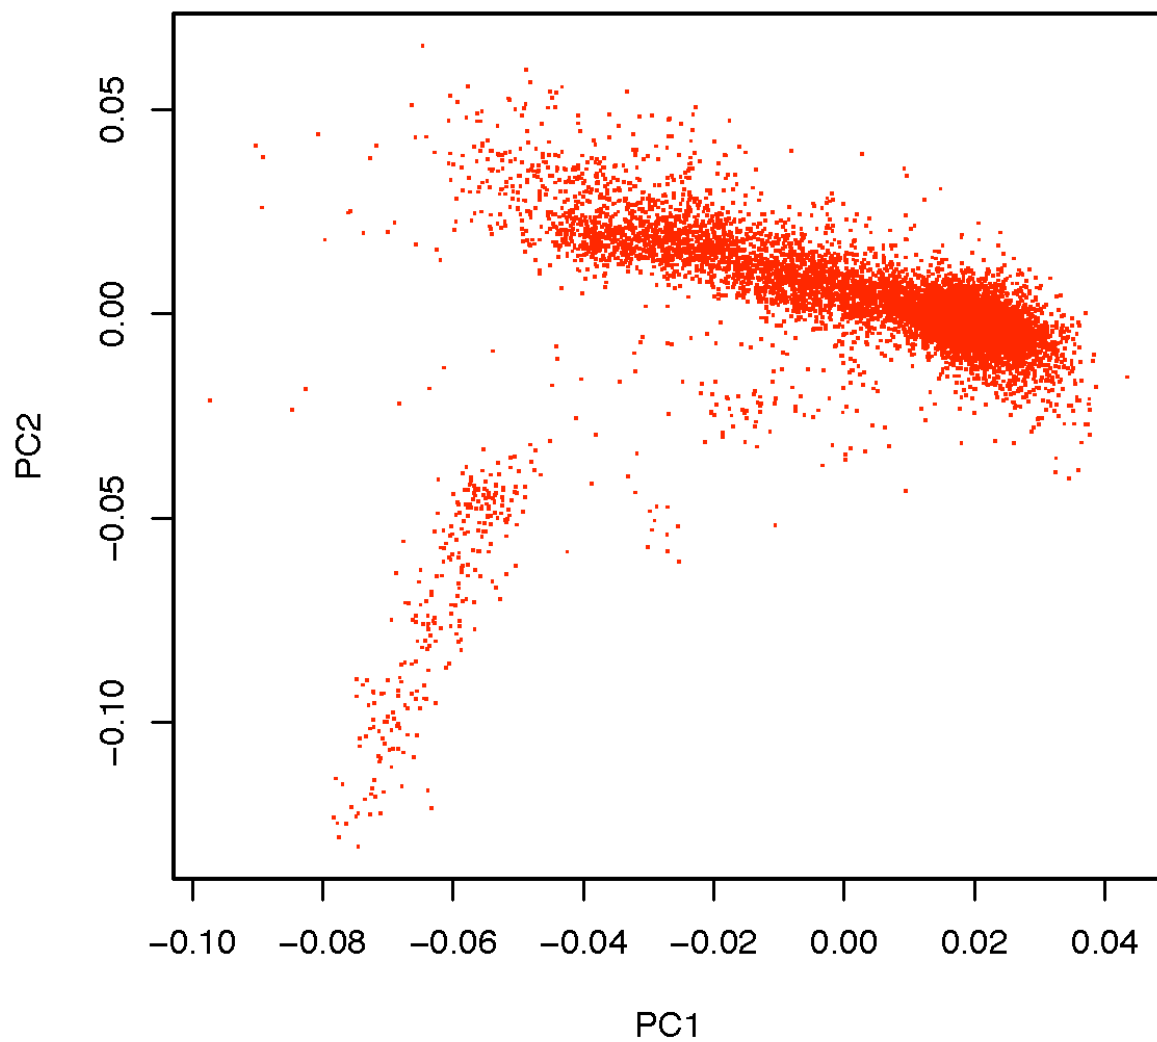



**Supplementary Table 1. Independent replication evidence from Framingham Heart Study participants for eight recently identified genetic loci associated with blood lipoproteins**

| Locus | Trait | SNP        | Nearest gene(s)             | Alleles* | Published statistical evidence <sup>†</sup> | FHS allele modeled (frequency) | FHS n | FHS effect size (s.e.m.) <sup>‡</sup> | FHS association P   |
|-------|-------|------------|-----------------------------|----------|---------------------------------------------|--------------------------------|-------|---------------------------------------|---------------------|
| 1p13  | LDL   | Rs599839   | <i>CELSR2, PSRC1, SORT1</i> | A, G     | $5 \times 10^{-42}$                         | G<br>(0.23)                    | 7,323 | -0.22<br>(0.02)                       | $1 \times 10^{-24}$ |
| 1q42  | HDL   | rs4846914  | <i>GALNT2</i>               | A, G     | $2 \times 10^{-13}$                         | G<br>(0.40)                    | 7,423 | -0.05<br>(0.02)                       | 0.004               |
| 12q24 | HDL   | rs2338104  | <i>MMAB, MVK</i>            | G, C     | $3 \times 10^{-8}$                          | C<br>(0.45)                    | 7,422 | -0.07<br>(0.02)                       | $6 \times 10^{-5}$  |
| 2p23  | TG    | rs780094   | <i>GCKR</i>                 | C, T     | $3 \times 10^{-14}$                         | T<br>(0.44)                    | 7,403 | 0.11<br>(0.02)                        | $3 \times 10^{-10}$ |
| 19p13 | TG    | rs16996148 | <i>CILP2, PBX4</i>          | G, T     | $4 \times 10^{-9}$                          | T<br>(0.07)                    | 7,320 | -0.10<br>(0.03)                       | 0.004               |
| 7q11  | TG    | rs17145738 | <i>MLXIPL</i>               | C, T     | $7 \times 10^{-22}$                         | T<br>(0.11)                    | 7,422 | -0.15<br>(0.03)                       | $2 \times 10^{-7}$  |
| 8q24  | TG    | rs17321515 | <i>TRIB1</i>                | A, G     | $4 \times 10^{-17}$                         | G<br>(0.45)                    | 7,403 | -0.10<br>(0.02)                       | $6 \times 10^{-9}$  |
| 1p31  | TG    | rs12130333 | <i>ANGPTL3</i>              | C, T     | $2 \times 10^{-8}$                          | T<br>(0.20)                    | 7,423 | -0.04<br>(0.02)                       | 0.046               |

SNP refers to single nucleotide polymorphism; FHS, Framingham Heart Study; LDL, low-density lipoprotein; HDL, high-density lipoprotein; TG, triglycerides.

\*Alleles for the SNP on the forward strand of human genome reference sequence (National Center for Biotechnology Information Build 35) were modeled.

<sup>†</sup>Published statistical evidence is derived from Table 2 in Kathiresan et al. except for rs2338104 where data from Willer et al. Table 3 is provided.

<sup>‡</sup>Effect size shown is beta-coefficient ( $\beta$ ) which represents the proportion of 1 standard deviation change (in standardized sex-specific blood lipid residual with mean=0 and SD=1 after adjustment for age and age<sup>2</sup>, and 10 principal components) per copy of the allele modeled.

**Supplementary Table 2. Stage 1 and 2 genome-wide association results for 11 newly-defined loci**

| Trait | Chr   | SNP       | Stage 1<br>association<br>P | Stage 1<br>sample<br>size | Stage 2<br>association<br>P | Stage 2<br>sample<br>size | Nearby gene(s) of<br>interest |
|-------|-------|-----------|-----------------------------|---------------------------|-----------------------------|---------------------------|-------------------------------|
| LDL   | 2p21  | rs6544713 | $2 \times 10^{-17}$         | 19,648                    | $7 \times 10^{-5}$          | 8,927                     | <i>ABCG8</i>                  |
| LDL   | 5q23  | rs1501908 | $6 \times 10^{-8}$          | 19,641                    | $4 \times 10^{-5}$          | 7,637                     | <i>TIMD4-TIMD1</i>            |
| LDL   | 20q12 | rs6102059 | $3 \times 10^{-7}$          | 19,648                    | 0.003                       | 9,247                     | <i>MAFB</i>                   |
| LDL   | 12q24 | rs2650000 | $2 \times 10^{-9}$          | 19,590                    | 0.03                        | 19,678                    | <i>TCF1</i>                   |
| HDL   | 11q12 | rs174547  | $2 \times 10^{-9}$          | 19,776                    | $7 \times 10^{-6}$          | 15,780                    | <i>FADS1-FADS2-</i>           |
| HDL   | 16q22 | rs2271293 | $2 \times 10^{-7}$          | 19,594                    | $1 \times 10^{-6}$          | 12,352                    | <i>LCAT</i>                   |
| HDL   | 9p22  | rs471364  | $4 \times 10^{-7}$          | 19,791                    | $1 \times 10^{-4}$          | 20,623                    | <i>TTC39B</i>                 |
| HDL   | 20q13 | rs1800961 | $6 \times 10^{-6}$          | 12,377                    | $2 \times 10^{-5}$          | 18,337                    | <i>HNF4A</i>                  |
| HDL   | 20q13 | rs7679    | $3 \times 10^{-4}$          | 19,728                    | $3 \times 10^{-6}$          | 20,520                    | <i>PLTP</i>                   |
| HDL   | 19p13 | rs2967605 | $4 \times 10^{-8}$          | 19,794                    | 0.02                        | 15,357                    | <i>ANGPTL4</i>                |
| TG    | 11q12 | rs174547  | $4 \times 10^{-7}$          | 19,822                    | $9 \times 10^{-9}$          | 19,024                    | <i>FADS1-FADS2-</i>           |
| TG    | 20q13 | rs7679    | $1 \times 10^{-5}$          | 19,774                    | $2 \times 10^{-6}$          | 18,787                    | <i>PLTP</i>                   |
| TG    | 8p23  | rs7819412 | $2 \times 10^{-7}$          | 19,803                    | 0.01                        | 13,533                    | <i>XKR6-AMACIL2</i>           |

SNP refers to single nucleotide polymorphism; LDL, low-density lipoprotein; HDL, high-density lipoprotein; TG, triglycerides.

**Supplementary Table 3. Association evidence for common polymorphisms using an uniform analysis across Stage 1 and Stage 2 studies**

| Trait | Chr   | SNP        | Gene(s) of interest within or near associated interval | Framingham Heart Study effect size estimates* |                                                    | Uniform Analysis in Stage 1 + Stage 2 studies |
|-------|-------|------------|--------------------------------------------------------|-----------------------------------------------|----------------------------------------------------|-----------------------------------------------|
|       |       |            |                                                        | major allele, minor allele, (MAF)             | effect size for minor allele (s.e.m.) <sup>†</sup> | effect size for minor allele (s.e.m.)         |
| LDL   | 2p21  | rs6544713  | <i>ABCG8</i>                                           | C, T (0.32) <sup>‡</sup>                      | 0.15 (0.01)                                        | 0.10 (0.01)                                   |
| LDL   | 5q23  | rs1501908  | <i>TIMD4-HAVCR1</i>                                    | C, G (0.37)                                   | -0.07 (0.02)                                       | -0.06 (0.01)                                  |
| LDL   | 20q12 | rs6102059  | <i>MAFB</i>                                            | C, T (0.32) <sup>‡</sup>                      | -0.06 (0.02)                                       | -0.06 (0.01)                                  |
| LDL   | 12q24 | rs2650000  | <i>TCF1</i>                                            | C, A (0.36)                                   | 0.07 (0.02)                                        | 0.04 (0.01)                                   |
| HDL   | 11q12 | rs174547   | <i>FADS1-FADS2-FADS3</i>                               | T, C (0.33)                                   | -0.09 (0.02)                                       | -0.05 (0.01)                                  |
| HDL   | 16q22 | rs2271293  | <i>LCAT</i>                                            | G, A (0.11)                                   | 0.07 (0.03)                                        | 0.11 (0.01)                                   |
| HDL   | 9p22  | rs471364   | <i>TTC39B</i>                                          | T, C (0.12)                                   | -0.08 (0.03)                                       | -0.08 (0.01)                                  |
| HDL   | 20q13 | rs1800961  | <i>HNF4A</i>                                           | C, T (0.03)                                   | -0.19 (0.05)                                       | -0.12 (0.02)                                  |
| HDL   | 20q13 | rs7679     | <i>PLTP</i>                                            | T, C (0.19)                                   | -0.07 (0.02)                                       | -0.06 (0.01)                                  |
| HDL   | 19p13 | rs2967605  | <i>ANGPTL4</i>                                         | C, T (0.16) <sup>‡</sup>                      | -0.12 (0.04)                                       | -0.06 (0.01)                                  |
| TG    | 11q12 | rs174547   | <i>FADS1-FADS2-FADS3</i>                               | T, C (0.33)                                   | 0.06 (0.02)                                        | 0.06 (0.01)                                   |
| TG    | 20q13 | rs7679     | <i>PLTP</i>                                            | T, C (0.19)                                   | 0.07 (0.02)                                        | 0.06 (0.01)                                   |
| TG    | 8p23  | rs7819412  | <i>XKR6-AMACIL2</i>                                    | A, G (0.48)                                   | -0.04 (0.02)                                       | 0.05 (0.01)                                   |
| LDL   | 1p13  | rs12740374 | <i>CELSR2, PSRC1, SORT1</i>                            | G, T (0.21) <sup>‡</sup>                      | -0.23 (0.02)                                       | -0.20 (0.01)                                  |
| LDL   | 2p24  | rs515135   | <i>APOB</i>                                            | C, T (0.20) <sup>‡</sup>                      | -0.16 (0.02)                                       | -0.17 (0.01)                                  |
| LDL   | 19q13 | rs4420638  | <i>APOE-C1-C4-C2</i>                                   | A, G (0.16) <sup>‡</sup>                      | 0.29 (0.06)                                        | 0.23 (0.02)                                   |
| LDL   | 19p13 | rs6511720  | <i>LDLR</i>                                            | G, T (0.10) <sup>‡</sup>                      | -0.26 (0.04)                                       | -0.24 (0.02)                                  |
| LDL   | 5q13  | rs3846663  | <i>HMGCR</i>                                           | C, T (0.38)                                   | 0.07 (0.02)                                        | 0.08 (0.01)                                   |
| LDL   | 19p13 | rs10401969 | <i>CSPG3, CILP2, PBX4</i>                              | T, C (0.06) <sup>‡</sup>                      | -0.05 (0.04)                                       | -0.13 (0.02)                                  |
| LDL   | 1p32  | rs11206510 | <i>PCSK9</i>                                           | T, C (0.19)                                   | -0.09 (0.02)                                       | -0.09 (0.02)                                  |
| HDL   | 16q13 | rs173539   | <i>CETP</i>                                            | C, T (0.32) <sup>‡</sup>                      | 0.25 (0.02)                                        | 0.24 (0.01)                                   |
| HD    | 8p21  | rs12678919 | <i>LPL</i>                                             | A, G (0.10) <sup>‡</sup>                      | 0.23 (0.03)                                        | 0.22 (0.02)                                   |
| HDL   | 15q22 | rs10468017 | <i>LIPC</i>                                            | C, T (0.30) <sup>‡</sup>                      | 0.10 (0.02)                                        | 0.12 (0.01)                                   |
| HDL   | 18q21 | rs4939883  | <i>LIPG</i>                                            | C, T (0.17)                                   | -0.14 (0.02)                                       | -0.12 (0.02)                                  |
| HDL   | 11q23 | rs964184   | <i>APOA1-C3-A4-A5</i>                                  | C, G (0.14) <sup>‡</sup>                      | -0.17 (0.03)                                       | -0.12 (0.02)                                  |
| HDL   | 12q24 | rs2338104  | <i>MMAB, MVK</i>                                       | G, C (0.45)                                   | -0.07 (0.02)                                       | -0.07 (0.01)                                  |
| HDL   | 9q31  | rs1883025  | <i>ABCA1</i>                                           | C, T (0.26) <sup>‡</sup>                      | -0.08 (0.02)                                       | -0.09 (0.01)                                  |
| HDL   | 1q42  | rs4846914  | <i>GALNT2</i>                                          | A, G (0.40)                                   | -0.05 (0.02)                                       | -0.05 (0.01)                                  |
| TG    | 11q23 | rs964184   | <i>APOA1-C3-A4-A5</i>                                  | C, G (0.14) <sup>‡</sup>                      | 0.30 (0.03)                                        | 0.28 (0.02)                                   |
| TG    | 8p21  | rs12678919 | <i>LPL</i>                                             | A, G (0.10) <sup>‡</sup>                      | -0.25 (0.03)                                       | -0.24 (0.02)                                  |
| TG    | 2p23  | rs1260326  | <i>GCKR</i>                                            | C, T (0.45) <sup>‡</sup>                      | 0.12 (0.02)                                        | 0.13 (0.01)                                   |
| TG    | 8q24  | rs2954029  | <i>TRIB1</i>                                           | A, T (0.44) <sup>‡</sup>                      | -0.11 (0.02)                                       | -0.09 (0.01)                                  |
| TG    | 7q11  | rs714052   | <i>MLXIPL</i>                                          | A, G (0.12) <sup>‡</sup>                      | -0.16 (0.03)                                       | -0.15 (0.02)                                  |
| TG    | 2p24  | rs7557067  | <i>APOB</i>                                            | A, G (0.22) <sup>‡</sup>                      | -0.08 (0.02)                                       | -0.08 (0.01)                                  |
| TG    | 19p13 | rs17216525 | <i>CSPG3, CILP2, PBX4</i>                              | C, T (0.07) <sup>‡</sup>                      | -0.11 (0.03)                                       | -0.14 (0.02)                                  |
| TG    | 1p31  | rs10889353 | <i>ANGPTL3</i>                                         | A, C (0.33) <sup>‡</sup>                      | -0.05 (0.02)                                       | -0.06 (0.01)                                  |

\* Effect size and direction from the Framingham Heart Study, the largest of the Stage 1 studies, are presented for illustrative purposes. Alleles for the SNP on the forward strand of human genome reference sequence (NCBI Build 36.2) are displayed and the minor allele at each SNP was modeled.

† Effect size shown is beta-coefficient ( $\beta$ ) which represents change in lipid levels measured in standard deviation units (in a sex-stratified analysis after adjustment age, age<sup>2</sup>, and 10 ancestry-informative principal components) per copy of the allele modeled.

‡ Results for these SNPs are derived from imputed SNP data.

§ For five of these loci (*MAFB*, *TIMD4-HAVCR1*, *FADS1-FADS2-FADS3*, *TTC39B*, *XKR6-AMACIL2*), there is no prior statistical evidence for association with blood lipoprotein concentrations. For the remaining six, there is at least some modest statistical evidence for common SNPs. For these six loci, we provide definitive evidence for common SNPs.

**Supplementary Table 4. Study-specific and meta-analytic association evidence for LDL cholesterol SNPs using an uniform analysis strategy**

| SNP              | Locus    | Major Allele     | Minor Allele | N            | P-value          | Effect Size for Minor |              | Cohort                 | Heterogeneity P |
|------------------|----------|------------------|--------------|--------------|------------------|-----------------------|--------------|------------------------|-----------------|
|                  |          |                  |              |              |                  | Allele                | s.e.         |                        |                 |
| rs6544713        | ABCG8    | C                | T            | 7083         | 2.81E-13         | 0.148                 | 0.02         | Framingham Heart Study | 0.22            |
| rs6544713        |          | C                | T            | 1050         | 0.09273          | 0.081                 | 0.048        | LOLIPOP                |                 |
| rs6544713        |          | C                | T            | 1533         | 0.02608          | 0.089                 | 0.04         | SUVIMAX                |                 |
| rs6544713        |          | G                | T            | 1132         | 0.02209          | 0.103                 | 0.045        | InCHIANTI              |                 |
| rs6544713        |          | C                | T            | 2693         | 0.01616          | 0.094                 | 0.039        | DGI                    |                 |
| rs6544713        |          | C                | T            | 1835         | 0.00684          | 0.119                 | 0.044        | FUSION Stage 1         |                 |
| rs6544713        |          | G                | C            | 3654         | 2.24E-05         | 0.106                 | 0.025        | MDC-CC                 |                 |
| rs6544713        |          | C                | A            | 1470         | 0.7821           | 0.013                 | 0.047        | FUSION Stage 2         |                 |
| rs6544713        |          | C                | T            | 4313         | 0.03212          | 0.06                  | 0.028        | METSIM                 |                 |
| <b>rs6544713</b> |          | <b>G</b>         | <b>T</b>     | <b>15326</b> | <b>2.62E-18</b>  | <b>0.121</b>          | <b>0.014</b> | <b>Stage 1</b>         |                 |
| <b>rs6544713</b> |          | <b>G</b>         | <b>A</b>     | <b>9437</b>  | <b>1.21E-05</b>  | <b>0.076</b>          | <b>0.017</b> | <b>Stage 2</b>         |                 |
| <b>rs6544713</b> |          | <b>C</b>         | <b>T</b>     | <b>24763</b> | <b>2.40E-21</b>  | <b>0.103</b>          | <b>0.011</b> | <b>Stage 1+2</b>       |                 |
| rs1501908        |          | TIMD4,<br>HAVCR1 | C            | G            | 7076             | 7.15E-05              | -0.073       | 0.018                  |                 |
| rs1501908        | C        |                  | G            | 1050         | 0.06692          | -0.084                | 0.046        | LOLIPOP                |                 |
| rs1501908        | C        |                  | G            | 1533         | 0.0002817        | -0.138                | 0.038        | SUVIMAX                |                 |
| rs1501908        | C        |                  | G            | 1132         | 0.2868           | -0.049                | 0.046        | InCHIANTI              |                 |
| rs1501908        | C        |                  | G            | 2693         | 0.3835           | -0.025                | 0.029        | DGI                    |                 |
| rs1501908        | C        |                  | G            | 1835         | 0.3044           | -0.038                | 0.037        | FUSION Stage 1         |                 |
| rs1501908        | C        |                  | G            | 4184         | 0.9005           | -0.004                | 0.032        | SardiNIA               |                 |
| rs1501908        | C        |                  | G            | 1495         | 0.1239           | -0.06                 | 0.039        | FUSION Stage 2         |                 |
| rs1501908        | C        |                  | G            | 3655         | 0.007096         | -0.07                 | 0.026        | METSIM                 |                 |
| rs1501908        | C        |                  | G            | 1181         | 0.03265          | -0.094                | 0.044        | ISIS                   |                 |
| <b>rs1501908</b> | <b>C</b> |                  | <b>G</b>     | <b>19503</b> | <b>5.24E-07</b>  | <b>-0.058</b>         | <b>0.012</b> | <b>Stage 1</b>         |                 |
| <b>rs1501908</b> | <b>C</b> |                  | <b>G</b>     | <b>6331</b>  | <b>0.0001979</b> | <b>-0.072</b>         | <b>0.019</b> | <b>Stage 2</b>         |                 |
| <b>rs1501908</b> | <b>C</b> |                  | <b>G</b>     | <b>25834</b> | <b>4.04E-10</b>  | <b>-0.062</b>         | <b>0.01</b>  | <b>Stage 1+2</b>       |                 |
| rs6102059        | MAFB     | C                | T            | 7083         | 0.001173         | -0.062                | 0.019        | Framingham Heart Study | 0.36            |
| rs6102059        |          | C                | A            | 1050         | 0.2588           | -0.054                | 0.048        | LOLIPOP                |                 |
| rs6102059        |          | C                | A            | 1533         | 0.09239          | 0.069                 | 0.041        | SUVIMAX                |                 |
| rs6102059        |          | C                | T            | 1132         | 0.001595         | -0.161                | 0.051        | InCHIANTI              |                 |
| rs6102059        |          | C                | A            | 2693         | 0.05057          | -0.06                 | 0.031        | DGI                    |                 |
| rs6102059        |          | C                | T            | 1835         | 0.005428         | -0.114                | 0.041        | FUSION Stage 1         |                 |
| rs6102059        |          | C                | T            | 4184         | 0.1372           | -0.055                | 0.037        | SardiNIA               |                 |
| rs6102059        |          | C                | A            | 4305         | 0.02445          | -0.054                | 0.024        | MDC-CC                 |                 |
| rs6102059        |          | C                | T            | 1430         | 0.1493           | -0.062                | 0.043        | FUSION Stage 2         |                 |

|                   |                            |          |          |              |                 |               |              |                        |             |
|-------------------|----------------------------|----------|----------|--------------|-----------------|---------------|--------------|------------------------|-------------|
| rs6102059         |                            | G        | C        | 4154         | 0.09296         | -0.042        | 0.025        | METSIM                 |             |
| <b>rs6102059</b>  |                            | <b>G</b> | <b>A</b> | <b>19510</b> | <b>1.88E-06</b> | <b>-0.059</b> | <b>0.012</b> | <b>Stage 1</b>         |             |
| <b>rs6102059</b>  |                            | <b>C</b> | <b>T</b> | <b>9889</b>  | <b>0.001821</b> | <b>-0.05</b>  | <b>0.016</b> | <b>Stage 2</b>         |             |
| <b>rs6102059</b>  |                            | <b>C</b> | <b>T</b> | <b>29399</b> | <b>1.32E-08</b> | <b>-0.056</b> | <b>0.01</b>  | <b>Stage 1+2</b>       | <b>0.1</b>  |
| rs2650000         | TCF1                       | G        | T        | 7025         | 4.01E-05        | 0.076         | 0.019        | Framingham Heart Study |             |
| rs2650000         |                            | C        | T        | 1050         | 0.03569         | 0.098         | 0.047        | LOLIPOP                |             |
| rs2650000         |                            | C        | T        | 1533         | 0.8375          | 0.008         | 0.039        | SUVIMAX                |             |
| rs2650000         |                            | C        | T        | 1132         | 0.2031          | 0.056         | 0.044        | InCHIANTI              |             |
| rs2650000         |                            | C        | T        | 2693         | 0.03056         | 0.059         | 0.027        | DGI                    |             |
| rs2650000         |                            | C        | T        | 1835         | 0.2765          | 0.037         | 0.034        | FUSION Stage 1         |             |
| rs2650000         |                            | C        | A        | 4184         | 0.006091        | 0.096         | 0.035        | SardiNIA               |             |
| rs2650000         |                            | G        | C        | 4706         | 0.1276          | 0.032         | 0.021        | MDC-CC                 |             |
| rs2650000         |                            | C        | T        | 7294         | 0.001314        | 0.054         | 0.017        | FINRISK 97             |             |
| rs2650000         |                            | G        | T        | 1456         | 0.09922         | -0.061        | 0.037        | FUSION Stage 2         |             |
| rs2650000         |                            | G        | C        | 3618         | 0.3379          | -0.023        | 0.024        | METSIM                 |             |
| rs2650000         |                            | C        | T        | 1197         | 0.1458          | 0.064         | 0.044        | ISIS                   |             |
| <b>rs2650000</b>  |                            | <b>C</b> | <b>T</b> | <b>19452</b> | <b>1.67E-08</b> | <b>0.065</b>  | <b>0.011</b> | <b>Stage 1</b>         |             |
| <b>rs2650000</b>  |                            | <b>C</b> | <b>T</b> | <b>18271</b> | <b>0.02243</b>  | <b>0.024</b>  | <b>0.011</b> | <b>Stage 2</b>         |             |
| <b>rs2650000</b>  |                            | <b>G</b> | <b>A</b> | <b>37723</b> | <b>3.80E-08</b> | <b>0.043</b>  | <b>0.008</b> | <b>Stage 1+2</b>       | <b>0.02</b> |
| rs12740374        | CELSR2,<br>PSRC1,<br>SORT1 | C        | T        | 7083         | 2.19E-28        | -0.247        | 0.022        | Framingham Heart Study |             |
| rs12740374        |                            | C        | T        | 1050         | 0.001853        | -0.16         | 0.051        | LOLIPOP                |             |
| rs12740374        |                            | C        | T        | 1533         | 0.000485        | -0.157        | 0.045        | SUVIMAX                |             |
| rs12740374        |                            | C        | T        | 1132         | 0.001339        | -0.17         | 0.053        | InCHIANTI              |             |
| rs12740374        |                            | G        | T        | 2693         | 1.35E-09        | -0.195        | 0.032        | DGI                    |             |
| rs12740374        |                            | G        | A        | 1835         | 0.0003852       | -0.142        | 0.04         | FUSION Stage 1         |             |
| rs12740374        |                            | C        | T        | 4184         | 7.74E-05        | -0.166        | 0.042        | SardiNIA               |             |
| <b>rs12740374</b> |                            | <b>C</b> | <b>T</b> | <b>19510</b> | <b>8.78E-48</b> | <b>-0.198</b> | <b>0.014</b> | <b>Stage 1</b>         | <b>0.19</b> |
| rs515135          | APOB                       | G        | C        | 7083         | 3.11E-14        | -0.166        | 0.022        | Framingham Heart Study |             |
| rs515135          |                            | G        | C        | 1050         | 0.07741         | -0.103        | 0.058        | LOLIPOP                |             |
| rs515135          |                            | G        | C        | 1533         | 4.86E-05        | -0.195        | 0.048        | SUVIMAX                |             |
| rs515135          |                            | G        | T        | 1132         | 0.009322        | -0.143        | 0.055        | InCHIANTI              |             |
| rs515135          |                            | C        | T        | 2693         | 2.09E-10        | -0.224        | 0.035        | DGI                    |             |
| rs515135          |                            | C        | T        | 1835         | 0.0003772       | -0.16         | 0.045        | FUSION Stage 1         |             |
| rs515135          |                            | C        | A        | 4184         | 7.60E-06        | -0.188        | 0.042        | SardiNIA               |             |
| <b>rs515135</b>   |                            | <b>C</b> | <b>T</b> | <b>19510</b> | <b>3.86E-35</b> | <b>-0.174</b> | <b>0.014</b> | <b>Stage 1</b>         | <b>0.5</b>  |
| rs4420638         | APOE-C1-C4-<br>C2          | A        | G        | 7083         | 9.26E-07        | 0.288         | 0.059        | Framingham Heart Study |             |

|                   |                       |          |          |              |                 |               |              |                        |             |
|-------------------|-----------------------|----------|----------|--------------|-----------------|---------------|--------------|------------------------|-------------|
| rs4420638         |                       | A        | G        | 1050         | 0.009495        | 0.19          | 0.073        | LOLIPOP                |             |
| rs4420638         |                       | A        | G        | 1533         | 0.001279        | 0.219         | 0.068        | SUVIMAX                |             |
| rs4420638         |                       | A        | G        | 1132         | 0.002091        | 0.28          | 0.091        | InCHIANTI              |             |
| rs4420638         |                       | A        | G        | 2693         | 2.64E-10        | 0.203         | 0.032        | DGI                    |             |
| rs4420638         |                       | A        | G        | 1835         | 4.71E-07        | 0.267         | 0.053        | FUSION Stage 1         |             |
| rs4420638         |                       | A        | G        | 4184         | 2.49E-06        | 0.259         | 0.055        | SardiNIA               |             |
| <b>rs4420638</b>  |                       | <b>A</b> | <b>G</b> | <b>19510</b> | <b>2.38E-31</b> | <b>0.234</b>  | <b>0.02</b>  | <b>Stage 1</b>         | <b>0.63</b> |
| rs6511720         | LDLR                  | G        | T        | 7083         | 9.99E-10        | -0.272        | 0.045        | Framingham Heart Study |             |
| rs6511720         |                       | C        | T        | 1050         | 0.0003008       | -0.361        | 0.1          | LOLIPOP                |             |
| rs6511720         |                       | G        | C        | 1533         | 6.90E-07        | -0.278        | 0.056        | SUVIMAX                |             |
| rs6511720         |                       | G        | C        | 1132         | 0.0005915       | -0.213        | 0.062        | InCHIANTI              |             |
| rs6511720         |                       | C        | T        | 2693         | 1.43E-07        | -0.275        | 0.052        | DGI                    |             |
| rs6511720         |                       | C        | T        | 1835         | 3.97E-05        | -0.226        | 0.055        | FUSION Stage 1         |             |
| rs6511720         |                       | G        | T        | 4184         | 0.02757         | -0.13         | 0.059        | SardiNIA               |             |
| <b>rs6511720</b>  |                       | <b>C</b> | <b>T</b> | <b>19510</b> | <b>5.18E-30</b> | <b>-0.245</b> | <b>0.021</b> | <b>Stage 1</b>         | <b>0.35</b> |
| rs3846663         | HMGR                  | G        | T        | 7083         | 0.0004073       | 0.065         | 0.018        | Framingham Heart Study |             |
| rs3846663         |                       | C        | T        | 1050         | 0.03885         | 0.094         | 0.046        | LOLIPOP                |             |
| rs3846663         |                       | C        | T        | 1533         | 0.01663         | 0.091         | 0.038        | SUVIMAX                |             |
| rs3846663         |                       | G        | A        | 1132         | 2.14E-05        | 0.187         | 0.044        | InCHIANTI              |             |
| rs3846663         |                       | C        | A        | 2693         | 0.004163        | 0.079         | 0.028        | DGI                    |             |
| rs3846663         |                       | C        | T        | 1835         | 0.0027          | 0.102         | 0.034        | FUSION Stage 1         |             |
| rs3846663         |                       | G        | T        | 4184         | 0.5564          | 0.02          | 0.034        | SardiNIA               |             |
| <b>rs3846663</b>  |                       | <b>C</b> | <b>T</b> | <b>19510</b> | <b>4.21E-12</b> | <b>0.079</b>  | <b>0.011</b> | <b>Stage 1</b>         | <b>0.12</b> |
| rs10401969        | CSPG3,<br>CILP2, PBX4 | T        | C        | 7083         | 0.1605          | -0.058        | 0.041        | Framingham Heart Study |             |
| rs10401969        |                       | T        | C        | 1050         | 0.1246          | -0.135        | 0.088        | LOLIPOP                |             |
| rs10401969        |                       | T        | C        | 1533         | 0.7066          | -0.032        | 0.085        | SUVIMAX                |             |
| rs10401969        |                       | T        | C        | 1132         | 6.33E-05        | -0.368        | 0.092        | InCHIANTI              |             |
| rs10401969        |                       | T        | C        | 2693         | 0.1229          | -0.073        | 0.047        | DGI                    |             |
| rs10401969        |                       | T        | C        | 1835         | 0.004425        | -0.222        | 0.078        | FUSION Stage 1         |             |
| rs10401969        |                       | T        | C        | 4184         | 3.24E-05        | -0.266        | 0.064        | SardiNIA               |             |
| <b>rs10401969</b> |                       | <b>T</b> | <b>C</b> | <b>19510</b> | <b>5.07E-08</b> | <b>-0.128</b> | <b>0.023</b> | <b>Stage 1</b>         | <b>0.01</b> |
| rs11206510        | PCSK9                 | T        | C        | 7064         | 0.0005963       | -0.078        | 0.023        | Framingham Heart Study |             |
| rs11206510        |                       | T        | C        | 1050         | 0.6066          | 0.031         | 0.06         | LOLIPOP                |             |
| rs11206510        |                       | T        | C        | 1533         | 0.532           | 0.05          | 0.08         | SUVIMAX                |             |
| rs11206510        |                       | T        | C        | 1132         | 0.1385          | -0.08         | 0.054        | InCHIANTI              |             |
| rs11206510        |                       | T        | C        | 2693         | 0.006429        | -0.099        | 0.036        | DGI                    |             |
| rs11206510        |                       | T        | C        | 1835         | 0.01122         | -0.213        | 0.084        | FUSION Stage 1         |             |
| rs11206510        |                       | T        | C        | 4184         | 0.0001545       | -0.14         | 0.037        | SardiNIA               |             |

|                   |          |          |              |                 |               |              |                |             |
|-------------------|----------|----------|--------------|-----------------|---------------|--------------|----------------|-------------|
| <b>rs11206510</b> | <b>T</b> | <b>C</b> | <b>19491</b> | <b>2.00E-08</b> | <b>-0.085</b> | <b>0.015</b> | <b>Stage 1</b> | <b>0.08</b> |
|-------------------|----------|----------|--------------|-----------------|---------------|--------------|----------------|-------------|

---



**Supplementary Table 5. Study-specific and meta-analytic association evidence for HDL cholesterol SNPs using an uniform analysis strategy**

| SNP              | Locus             | Major Allele | Minor Allele | N            | P-value          | Effect Size for Minor Allele | s.e.         | Cohort                 | Heterogeneity P        |                        |
|------------------|-------------------|--------------|--------------|--------------|------------------|------------------------------|--------------|------------------------|------------------------|------------------------|
| rs174547         | FADS1-FADS2-FADS3 | T            | C            | 7118         | 3.07E-06         | -0.089                       | 0.019        | Framingham Heart Study | <b>0.17</b>            |                        |
| rs174547         |                   | T            | C            | 1050         | 0.1026           | -0.073                       | 0.045        | LOLIPOP                |                        |                        |
| rs174547         |                   | T            | C            | 1533         | 0.8375           | -0.008                       | 0.039        | SUVIMAX                |                        |                        |
| rs174547         |                   | T            | C            | 1132         | 0.6704           | 0.02                         | 0.047        | InCHIANTI              |                        |                        |
| rs174547         |                   | T            | C            | 2728         | 0.03002          | -0.06                        | 0.028        | DGI                    |                        |                        |
| rs174547         |                   | T            | C            | 1872         | 0.1222           | -0.051                       | 0.033        | FUSION Stage 1         |                        |                        |
| rs174547         |                   | T            | C            | 4184         | 0.009322         | -0.091                       | 0.035        | SardiNIA               |                        |                        |
| rs174547         |                   | T            | C            | 4774         | 0.9276           | 0.002                        | 0.022        | MDC-CC                 |                        |                        |
| rs174547         |                   | T            | C            | 7590         | 0.0002719        | -0.06                        | 0.016        | FINRISK 97             |                        |                        |
| rs174547         |                   | T            | C            | 2163         | 0.1755           | -0.042                       | 0.031        | FUSION Stage 2         |                        |                        |
| rs174547         |                   | T            | C            | 3637         | 0.01566          | -0.058                       | 0.024        | METSIM                 |                        |                        |
| rs174547         |                   | T            | C            | 2307         | 0.8201           | -0.007                       | 0.032        | ISIS                   |                        |                        |
| <b>rs174547</b>  |                   | <b>T</b>     | <b>C</b>     | <b>19617</b> | <b>2.69E-08</b>  | <b>-0.065</b>                | <b>0.012</b> | <b>Stage 1</b>         |                        |                        |
| <b>rs174547</b>  |                   | <b>T</b>     | <b>C</b>     | <b>20471</b> | <b>0.0001652</b> | <b>-0.039</b>                | <b>0.01</b>  | <b>Stage 2</b>         |                        |                        |
| <b>rs174547</b>  |                   | <b>T</b>     | <b>C</b>     | <b>40088</b> | <b>8.39E-11</b>  | <b>-0.05</b>                 | <b>0.008</b> | <b>Stage 1+2</b>       |                        |                        |
| rs2271293        |                   | LCAT         | G            | A            | 6944             | 0.0007728                    | 0.098        | 0.029                  |                        | Framingham Heart Study |
| rs2271293        | G                 |              | A            | 1050         | 0.4388           | 0.059                        | 0.076        | LOLIPOP                |                        |                        |
| rs2271293        | G                 |              | A            | 1533         | 0.2163           | 0.068                        | 0.055        | SUVIMAX                |                        |                        |
| rs2271293        | G                 |              | A            | 1132         | 0.1436           | 0.098                        | 0.067        | InCHIANTI              |                        |                        |
| rs2271293        | G                 |              | A            | 2728         | 0.009033         | 0.102                        | 0.039        | DGI                    |                        |                        |
| rs2271293        | G                 |              | A            | 1872         | 0.0005512        | 0.152                        | 0.044        | FUSION Stage 1         |                        |                        |
| rs2271293        | G                 |              | A            | 4184         | 0.03455          | 0.093                        | 0.044        | SardiNIA               |                        |                        |
| rs2271293        | G                 |              | A            | 2364         | 0.06618          | 0.079                        | 0.043        | MDC-CC                 |                        |                        |
| rs2271293        | G                 |              | A            | 7425         | 4.82E-08         | 0.121                        | 0.022        | FINRISK 97             |                        |                        |
| <b>rs2271293</b> | <b>G</b>          |              | <b>A</b>     | <b>19443</b> | <b>1.41E-09</b>  | <b>0.101</b>                 | <b>0.017</b> | <b>Stage 1</b>         |                        |                        |
| <b>rs2271293</b> | <b>G</b>          |              | <b>A</b>     | <b>9789</b>  | <b>1.23E-08</b>  | <b>0.112</b>                 | <b>0.02</b>  | <b>Stage 2</b>         |                        |                        |
| <b>rs2271293</b> | <b>G</b>          |              | <b>A</b>     | <b>29232</b> | <b>8.59E-17</b>  | <b>0.106</b>                 | <b>0.013</b> | <b>Stage 1+2</b>       |                        |                        |
| rs471364         | TTC39B            |              | T            | C            | 7132             | 0.03427                      | -0.059       | 0.028                  | Framingham Heart Study |                        |
| rs471364         |                   |              | T            | C            | 1050             | 0.3556                       | -0.063       | 0.068                  | LOLIPOP                |                        |
| rs471364         |                   |              | T            | C            | 1533             | 0.1524                       | -0.083       | 0.058                  | SUVIMAX                |                        |

|                  |       |          |          |              |                 |               |              |                        |             |
|------------------|-------|----------|----------|--------------|-----------------|---------------|--------------|------------------------|-------------|
| rs471364         |       | T        | C        | 1132         | 0.1131          | -0.103        | 0.065        | InCHIANTI              |             |
| rs471364         |       | T        | C        | 2728         | 0.0003042       | -0.153        | 0.042        | DGI                    |             |
| rs471364         |       | T        | C        | 1872         | 0.3914          | -0.048        | 0.056        | FUSION Stage 1         |             |
| rs471364         |       | T        | C        | 4184         | 0.06037         | -0.077        | 0.041        | SardiNIA               |             |
| rs471364         |       | T        | C        | 4790         | 0.1257          | -0.049        | 0.032        | MDC-CC                 |             |
| rs471364         |       | T        | C        | 7402         | 0.01813         | -0.067        | 0.028        | FINRISK 97             |             |
| rs471364         |       | T        | C        | 2160         | 0.8503          | -0.01         | 0.053        | FUSION Stage 2         |             |
| rs471364         |       | T        | C        | 3644         | 0.01516         | -0.102        | 0.042        | METSIM                 |             |
| rs471364         |       | T        | C        | 2341         | 0.003952        | -0.129        | 0.045        | ISIS                   |             |
| <b>rs471364</b>  |       | <b>T</b> | <b>C</b> | <b>19631</b> | <b>1.64E-06</b> | <b>-0.081</b> | <b>0.017</b> | <b>Stage 1</b>         |             |
| <b>rs471364</b>  |       | <b>T</b> | <b>C</b> | <b>20337</b> | <b>2.17E-05</b> | <b>-0.07</b>  | <b>0.017</b> | <b>Stage 2</b>         |             |
| <b>rs471364</b>  |       | <b>T</b> | <b>C</b> | <b>39968</b> | <b>1.41E-10</b> | <b>-0.076</b> | <b>0.012</b> | <b>Stage 1+2</b>       | <b>0.8</b>  |
| rs1800961        | HNF4A | C        | T        | 7127         | 0.001184        | -0.17         | 0.052        | Framingham Heart Study |             |
| rs1800961        |       | C        | T        | 1050         | 0.3214          | -0.191        | 0.192        | LOLIPOP                |             |
| rs1800961        |       | C        | T        | 1533         | 0.9477          | 0.008         | 0.122        | SUVIMAX                |             |
| rs1800961        |       | C        | T        | 1132         | 0.3869          | -0.154        | 0.178        | InCHIANTI              |             |
| rs1800961        |       | C        | T        | 2728         | 0.8566          | 0.027         | 0.152        | DGI                    |             |
| rs1800961        |       | C        | T        | 1872         | 0.0027          | -0.243        | 0.081        | FUSION Stage 1         |             |
| rs1800961        |       | C        | T        | 4781         | 0.0394          | -0.103        | 0.05         | MDC-CC                 |             |
| rs1800961        |       | C        | T        | 7590         | 0.07335         | -0.074        | 0.041        | FINRISK 97             |             |
| rs1800961        |       | C        | T        | 2175         | 0.003847        | -0.211        | 0.073        | FUSION Stage 2         |             |
| rs1800961        |       | C        | T        | 3656         | 0.09346         | -0.104        | 0.062        | METSIM                 |             |
| <b>rs1800961</b> |       | <b>C</b> | <b>T</b> | <b>15442</b> | <b>4.19E-05</b> | <b>-0.157</b> | <b>0.038</b> | <b>Stage 1</b>         |             |
| <b>rs1800961</b> |       | <b>C</b> | <b>T</b> | <b>18202</b> | <b>6.65E-05</b> | <b>-0.105</b> | <b>0.026</b> | <b>Stage 2</b>         |             |
| <b>rs1800961</b> |       | <b>C</b> | <b>T</b> | <b>33644</b> | <b>1.99E-08</b> | <b>-0.122</b> | <b>0.022</b> | <b>Stage 1+2</b>       | <b>0.59</b> |
| rs7679           | PLTP  | T        | C        | 7074         | 0.0007201       | -0.078        | 0.023        | Framingham Heart Study |             |
| rs7679           |       | T        | C        | 1050         | 0.3531          | -0.053        | 0.057        | LOLIPOP                |             |
| rs7679           |       | T        | C        | 1533         | 0.08995         | -0.078        | 0.046        | SUVIMAX                |             |
| rs7679           |       | T        | C        | 1132         | 0.2706          | -0.065        | 0.059        | InCHIANTI              |             |
| rs7679           |       | T        | C        | 2728         | 0.8623          | -0.007        | 0.038        | DGI                    |             |
| rs7679           |       | T        | C        | 1872         | 0.2519          | -0.055        | 0.048        | FUSION Stage 1         |             |
| rs7679           |       | T        | C        | 4184         | 0.1146          | -0.071        | 0.045        | SardiNIA               |             |
| rs7679           |       | T        | C        | 4780         | 0.003401        | -0.077        | 0.026        | MDC-CC                 |             |
| rs7679           |       | T        | C        | 7376         | 0.03266         | -0.049        | 0.023        | FINRISK 97             |             |
| rs7679           |       | T        | C        | 2105         | 0.0532          | -0.087        | 0.045        | FUSION Stage 2         |             |
| rs7679           |       | T        | C        | 3623         | 0.1122          | -0.054        | 0.034        | METSIM                 |             |

|                   |         |          |          |              |                  |               |              |                        |             |
|-------------------|---------|----------|----------|--------------|------------------|---------------|--------------|------------------------|-------------|
| rs7679            |         | T        | C        | 2350         | 0.305            | -0.04         | 0.039        | ISIS                   |             |
| <b>rs7679</b>     |         | <b>T</b> | <b>C</b> | <b>19573</b> | <b>2.88E-05</b>  | <b>-0.062</b> | <b>0.015</b> | <b>Stage 1</b>         |             |
| <b>rs7679</b>     |         | <b>T</b> | <b>C</b> | <b>20234</b> | <b>1.14E-05</b>  | <b>-0.06</b>  | <b>0.014</b> | <b>Stage 2</b>         |             |
| <b>rs7679</b>     |         | <b>T</b> | <b>C</b> | <b>39807</b> | <b>1.28E-09</b>  | <b>-0.061</b> | <b>0.01</b>  | <b>Stage 1+2</b>       | <b>0.3</b>  |
| rs2967605         | ANGPTL4 | C        | T        | 7135         | 0.001876         | -0.112        | 0.036        | Framingham Heart Study |             |
| rs2967605         |         | C        | T        | 1050         | 0.3567           | -0.062        | 0.068        | LOLIPOP                |             |
| rs2967605         |         | C        | T        | 1533         | 0.7286           | 0.017         | 0.049        | SUVIMAX                |             |
| rs2967605         |         | C        | T        | 1132         | 0.1764           | -0.073        | 0.054        | InCHIANTI              |             |
| rs2967605         |         | G        | A        | 2728         | 0.2783           | -0.043        | 0.04         | DGI                    |             |
| rs2967605         |         | C        | T        | 1872         | 0.005676         | -0.13         | 0.047        | FUSION Stage 1         |             |
| rs2967605         |         | G        | A        | 2334         | 0.08242          | -0.066        | 0.038        | MDC-CC                 |             |
| rs2967605         |         | C        | T        | 2138         | 0.5098           | -0.029        | 0.044        | FUSION Stage 2         |             |
| rs2967605         |         | C        | T        | 4335         | 0.114            | -0.049        | 0.031        | METSIM                 |             |
| <b>rs2967605</b>  |         | <b>C</b> | <b>T</b> | <b>15450</b> | <b>0.0001228</b> | <b>-0.072</b> | <b>0.019</b> | <b>Stage 1</b>         |             |
| <b>rs2967605</b>  |         | <b>C</b> | <b>T</b> | <b>8807</b>  | <b>0.01874</b>   | <b>-0.05</b>  | <b>0.021</b> | <b>Stage 2</b>         |             |
| <b>rs2967605</b>  |         | <b>C</b> | <b>T</b> | <b>24257</b> | <b>8.88E-06</b>  | <b>-0.062</b> | <b>0.014</b> | <b>Stage 1+2</b>       | <b>0.51</b> |
| rs173539          | CETP    | C        | T        | 7135         | 1.11E-37         | 0.251         | 0.02         | Framingham Heart Study |             |
| rs173539          |         | C        | T        | 1050         | 1.97E-08         | 0.326         | 0.058        | LOLIPOP                |             |
| rs173539          |         | C        | T        | 1533         | 2.27E-08         | 0.218         | 0.039        | SUVIMAX                |             |
| rs173539          |         | C        | T        | 1132         | 1.74E-10         | 0.3           | 0.047        | InCHIANTI              |             |
| rs173539          |         | C        | T        | 2728         | 7.79E-11         | 0.187         | 0.029        | DGI                    |             |
| rs173539          |         | C        | T        | 1872         | 4.98E-11         | 0.276         | 0.042        | FUSION Stage 1         |             |
| <b>rs173539</b>   |         | <b>C</b> | <b>T</b> | <b>15450</b> | <b>2.28E-77</b>  | <b>0.244</b>  | <b>0.013</b> | <b>Stage 1</b>         |             |
| rs12678919        | LPL     | A        | G        | 7135         | 1.68E-14         | 0.237         | 0.031        | Framingham Heart Study |             |
| rs12678919        |         | A        | G        | 1050         | 0.003213         | 0.209         | 0.071        | LOLIPOP                |             |
| rs12678919        |         | A        | G        | 1533         | 4.02E-07         | 0.299         | 0.059        | SUVIMAX                |             |
| rs12678919        |         | A        | G        | 1132         | 1.88E-05         | 0.261         | 0.061        | InCHIANTI              |             |
| rs12678919        |         | A        | G        | 2728         | 0.005769         | 0.128         | 0.046        | DGI                    |             |
| rs12678919        |         | A        | G        | 1872         | 0.0027           | 0.171         | 0.057        | FUSION Stage 1         |             |
| rs12678919        |         | A        | G        | 4184         | 3.80E-06         | 0.208         | 0.045        | SardiNIA               |             |
| <b>rs12678919</b> |         | <b>A</b> | <b>G</b> | <b>19634</b> | <b>1.18E-32</b>  | <b>0.215</b>  | <b>0.018</b> | <b>Stage 1</b>         | <b>0.22</b> |
| rs10468017        | LIPC    | G        | A        | 7135         | 1.27E-06         | 0.097         | 0.02         | Framingham Heart Study |             |
| rs10468017        |         | C        | T        | 1050         | 0.01839          | 0.119         | 0.051        | LOLIPOP                |             |
| rs10468017        |         | C        | T        | 1533         | 0.001745         | 0.144         | 0.046        | SUVIMAX                |             |
| rs10468017        |         | C        | T        | 1132         | 0.0001147        | 0.189         | 0.049        | InCHIANTI              |             |
| rs10468017        |         | C        | T        | 2728         | 0.0001026        | 0.114         | 0.029        | DGI                    |             |

|                   |                |          |          |              |                 |               |              |                        |              |
|-------------------|----------------|----------|----------|--------------|-----------------|---------------|--------------|------------------------|--------------|
| rs10468017        |                | C        | T        | 1872         | 5.09E-05        | 0.158         | 0.039        | FUSION Stage 1         |              |
| rs10468017        |                | C        | T        | 4184         | 4.90E-05        | 0.134         | 0.033        | SardiNIA               |              |
| <b>rs10468017</b> |                | <b>G</b> | <b>A</b> | <b>19634</b> | <b>8.31E-23</b> | <b>0.122</b>  | <b>0.012</b> | <b>Stage 1</b>         | <b>0.48</b>  |
| rs4939883         | LIPG           | C        | T        | 7127         | 3.50E-09        | -0.141        | 0.024        | Framingham Heart Study |              |
| rs4939883         |                | C        | T        | 1050         | 0.06294         | -0.107        | 0.058        | LOLIPOP                |              |
| rs4939883         |                | C        | T        | 1533         | 0.01504         | -0.124        | 0.051        | SUVIMAX                |              |
| rs4939883         |                | C        | T        | 1132         | 0.675           | -0.026        | 0.062        | InCHIANTI              |              |
| rs4939883         |                | C        | T        | 2728         | 0.01813         | -0.08         | 0.034        | DGI                    |              |
| rs4939883         |                | C        | T        | 4184         | 0.0001087       | -0.209        | 0.054        | SardiNIA               |              |
| <b>rs4939883</b>  |                | <b>C</b> | <b>T</b> | <b>17754</b> | <b>2.61E-14</b> | <b>-0.121</b> | <b>0.016</b> | <b>Stage 1</b>         | <b>0.29</b>  |
| rs964184          | APOA1-C3-A4-A5 | C        | G        | 7135         | 7.05E-12        | -0.177        | 0.026        | Framingham Heart Study |              |
| rs964184          |                | C        | G        | 1050         | 0.02818         | -0.143        | 0.065        | LOLIPOP                |              |
| rs964184          |                | C        | G        | 1533         | 0.0495          | -0.11         | 0.056        | SUVIMAX                |              |
| rs964184          |                | C        | G        | 1132         | 0.000189        | -0.224        | 0.06         | InCHIANTI              |              |
| rs964184          |                | C        | G        | 2728         | 0.8883          | -0.005        | 0.038        | DGI                    |              |
| rs964184          |                | C        | G        | 1872         | 0.04334         | -0.099        | 0.049        | FUSION Stage 1         |              |
| rs964184          |                | C        | G        | 4184         | 0.6424          | -0.026        | 0.056        | SardiNIA               |              |
| <b>rs964184</b>   |                | <b>C</b> | <b>G</b> | <b>19634</b> | <b>1.65E-13</b> | <b>-0.12</b>  | <b>0.016</b> | <b>Stage 1</b>         | <b>0.006</b> |
| rs2338104         | MMAB, MVK      | C        | T        | 7134         | 5.14E-05        | -0.073        | 0.018        | Framingham Heart Study |              |
| rs2338104         |                | C        | T        | 1050         | 0.8198          | -0.01         | 0.044        | LOLIPOP                |              |
| rs2338104         |                | C        | T        | 1533         | 0.1049          | -0.06         | 0.037        | SUVIMAX                |              |
| rs2338104         |                | C        | T        | 1132         | 0.1107          | -0.067        | 0.042        | InCHIANTI              |              |
| rs2338104         |                | C        | T        | 2728         | 0.1946          | -0.035        | 0.027        | DGI                    |              |
| rs2338104         |                | C        | T        | 1872         | 0.001491        | -0.108        | 0.034        | FUSION Stage 1         |              |
| rs2338104         |                | C        | T        | 4184         | 0.0002332       | -0.092        | 0.025        | SardiNIA               |              |
| <b>rs2338104</b>  |                | <b>C</b> | <b>T</b> | <b>19633</b> | <b>1.28E-10</b> | <b>-0.069</b> | <b>0.011</b> | <b>Stage 1</b>         | <b>0.33</b>  |
| rs1883025         | ABCA1          | C        | T        | 7135         | 0.0002652       | -0.077        | 0.021        | Framingham Heart Study |              |
| rs1883025         |                | C        | T        | 1050         | 0.5354          | -0.043        | 0.069        | LOLIPOP                |              |
| rs1883025         |                | C        | T        | 1533         | 0.0329          | -0.096        | 0.045        | SUVIMAX                |              |
| rs1883025         |                | C        | T        | 1132         | 0.6662          | -0.022        | 0.051        | InCHIANTI              |              |
| rs1883025         |                | C        | T        | 2728         | 1.06E-05        | -0.142        | 0.032        | DGI                    |              |
| rs1883025         |                | C        | T        | 1872         | 0.2404          | -0.054        | 0.046        | FUSION Stage 1         |              |
| rs1883025         |                | C        | T        | 4184         | 0.000285        | -0.127        | 0.035        | SardiNIA               |              |
| <b>rs1883025</b>  |                | <b>C</b> | <b>T</b> | <b>19634</b> | <b>1.86E-11</b> | <b>-0.09</b>  | <b>0.013</b> | <b>Stage 1</b>         | <b>0.43</b>  |
| rs4846914         | GALNT2         | A        | G        | 7135         | 0.02072         | -0.042        | 0.018        | Framingham Heart Study |              |
| rs4846914         |                | A        | G        | 1050         | 0.09004         | -0.077        | 0.046        | LOLIPOP                |              |

|                  |          |          |              |                 |               |              |                |             |
|------------------|----------|----------|--------------|-----------------|---------------|--------------|----------------|-------------|
| rs4846914        | A        | G        | 1533         | 0.07787         | -0.067        | 0.038        | SUVIMAX        |             |
| rs4846914        | A        | G        | 1132         | 0.03314         | 0.098         | 0.046        | InCHIANTI      |             |
| rs4846914        | A        | G        | 2728         | 0.02329         | -0.062        | 0.027        | DGI            |             |
| rs4846914        | A        | G        | 1872         | 0.002972        | -0.101        | 0.034        | FUSION Stage 1 |             |
| rs4846914        | A        | G        | 4184         | 0.008854        | -0.089        | 0.034        | SardiNIA       |             |
| <b>rs4846914</b> | <b>A</b> | <b>G</b> | <b>19634</b> | <b>2.93E-06</b> | <b>-0.053</b> | <b>0.011</b> | <b>Stage 1</b> | <b>0.04</b> |

**Supplementary Table 6. Study-specific and meta-analytic association evidence for triglyceride SNPs using an uniform analysis strategy**

| SNP             | Locus                     | Major Allele | Minor Allele | N            | P-value          | Effect Size for Minor Allele | s.e.         | Cohort                 | Heterogeneity P |                        |
|-----------------|---------------------------|--------------|--------------|--------------|------------------|------------------------------|--------------|------------------------|-----------------|------------------------|
| rs174547        | FADS1-<br>FADS2-<br>FADS3 | T            | C            | 7120         | 6.77E-05         | 0.075                        | 0.019        | Framingham Heart Study | <b>0.95</b>     |                        |
| rs174547        |                           | T            | C            | 1050         | 0.5491           | 0.027                        | 0.045        | LOLIPOP                |                 |                        |
| rs174547        |                           | T            | C            | 1552         | 0.1824           | 0.052                        | 0.039        | SUVIMAX                |                 |                        |
| rs174547        |                           | T            | C            | 1132         | 0.7658           | 0.014                        | 0.047        | InCHIANTI              |                 |                        |
| rs174547        |                           | T            | C            | 2773         | 0.01498          | 0.066                        | 0.027        | DGI                    |                 |                        |
| rs174547        |                           | T            | C            | 1872         | 0.05245          | 0.064                        | 0.033        | FUSION Stage 1         |                 |                        |
| rs174547        |                           | T            | C            | 4184         | 0.006386         | 0.09                         | 0.033        | SardiNIA               |                 |                        |
| rs174547        |                           | T            | C            | 4820         | 0.0181           | 0.052                        | 0.022        | MDC-CC                 |                 |                        |
| rs174547        |                           | T            | C            | 7590         | 0.001093         | 0.054                        | 0.016        | FINRISK 97             |                 |                        |
| rs174547        |                           | T            | C            | 1689         | 0.003252         | 0.103                        | 0.035        | FUSION Stage 2         |                 |                        |
| rs174547        |                           | T            | C            | 3638         | 0.005244         | 0.067                        | 0.024        | METSIM                 |                 |                        |
| rs174547        |                           | T            | C            | 1161         | 0.4866           | 0.032                        | 0.046        | ISIS                   |                 |                        |
| <b>rs174547</b> |                           | <b>T</b>     | <b>C</b>     | <b>19683</b> | <b>1.43E-08</b>  | <b>0.065</b>                 | <b>0.011</b> | <b>Stage 1</b>         |                 |                        |
| <b>rs174547</b> |                           | <b>T</b>     | <b>C</b>     | <b>18898</b> | <b>2.83E-08</b>  | <b>0.059</b>                 | <b>0.011</b> | <b>Stage 2</b>         |                 |                        |
| <b>rs174547</b> |                           | <b>T</b>     | <b>C</b>     | <b>38581</b> | <b>1.70E-15</b>  | <b>0.062</b>                 | <b>0.008</b> | <b>Stage 1+2</b>       |                 |                        |
| rs7679          |                           | PLTP         | T            | C            | 7076             | 0.01942                      | 0.053        | 0.023                  |                 | Framingham Heart Study |
| rs7679          |                           |              | T            | C            | 1050             | 0.3131                       | 0.058        | 0.057                  |                 | LOLIPOP                |
| rs7679          | T                         |              | C            | 1552         | 0.2235           | 0.056                        | 0.046        | SUVIMAX                |                 |                        |
| rs7679          | T                         |              | C            | 1132         | 0.4871           | -0.041                       | 0.059        | InCHIANTI              |                 |                        |
| rs7679          | T                         |              | C            | 2773         | 0.8568           | 0.007                        | 0.037        | DGI                    |                 |                        |
| rs7679          | T                         |              | C            | 1872         | 0.1336           | 0.072                        | 0.048        | FUSION Stage 1         |                 |                        |
| rs7679          | T                         |              | C            | 4184         | 9.26E-05         | 0.172                        | 0.044        | SardiNIA               |                 |                        |
| rs7679          | T                         |              | C            | 4827         | 0.0003477        | 0.093                        | 0.026        | MDC-CC                 |                 |                        |
| rs7679          | T                         |              | C            | 7376         | 0.1049           | 0.037                        | 0.023        | FINRISK 97             |                 |                        |
| rs7679          | T                         |              | C            | 1639         | 0.04342          | 0.103                        | 0.051        | FUSION Stage 2         |                 |                        |
| rs7679          | T                         |              | C            | 3624         | 0.07279          | 0.061                        | 0.034        | METSIM                 |                 |                        |
| rs7679          | T                         |              | C            | 1192         | 0.05378          | 0.108                        | 0.056        | ISIS                   |                 |                        |
| <b>rs7679</b>   | <b>T</b>                  |              | <b>C</b>     | <b>19639</b> | <b>0.0001471</b> | <b>0.056</b>                 | <b>0.015</b> | <b>Stage 1</b>         |                 |                        |
| <b>rs7679</b>   | <b>T</b>                  |              | <b>C</b>     | <b>18658</b> | <b>2.00E-06</b>  | <b>0.068</b>                 | <b>0.014</b> | <b>Stage 2</b>         |                 |                        |

| <b>rs7679</b>     |                    | <b>T</b> | <b>C</b> | <b>38297</b> | <b>1.29E-09</b> | <b>0.062</b>  | <b>0.01</b>  | <b>Stage 1+2</b>       | <b>0.21</b> |
|-------------------|--------------------|----------|----------|--------------|-----------------|---------------|--------------|------------------------|-------------|
| rs7819412         | XKR6,<br>AMAC1L2   | A        | G        | 7102         | 0.001488        | -0.056        | 0.018        | Framingham Heart Study |             |
| rs7819412         |                    | A        | G        | 1050         | 0.799           | -0.011        | 0.043        | LOLIPOP                |             |
| rs7819412         |                    | A        | G        | 1552         | 0.002288        | -0.122        | 0.04         | SUVIMAX                |             |
| rs7819412         |                    | A        | G        | 1132         | 0.1531          | -0.06         | 0.042        | InCHIANTI              |             |
| rs7819412         |                    | A        | G        | 2773         | 0.1343          | -0.04         | 0.027        | DGI                    |             |
| rs7819412         |                    | A        | G        | 1872         | 0.0181          | -0.078        | 0.033        | FUSION Stage 1         |             |
| rs7819412         |                    | A        | G        | 4184         | 0.001065        | -0.108        | 0.033        | SardiNIA               |             |
| rs7819412         |                    | A        | G        | 4829         | 0.3953          | -0.017        | 0.02         | MDC-CC                 |             |
| rs7819412         |                    | A        | G        | 7402         | 0.2043          | -0.021        | 0.016        | FINRISK 97             |             |
| rs7819412         |                    | A        | G        | 1177         | 0.2226          | -0.05         | 0.041        | ISIS                   |             |
| <b>rs7819412</b>  |                    | <b>A</b> | <b>G</b> | <b>19665</b> | <b>8.58E-09</b> | <b>-0.064</b> | <b>0.011</b> | <b>Stage 1</b>         |             |
| <b>rs7819412</b>  |                    | <b>A</b> | <b>G</b> | <b>13408</b> | <b>0.06904</b>  | <b>-0.022</b> | <b>0.012</b> | <b>Stage 2</b>         |             |
| <b>rs7819412</b>  |                    | <b>A</b> | <b>G</b> | <b>33073</b> | <b>4.36E-08</b> | <b>-0.045</b> | <b>0.008</b> | <b>Stage 1+2</b>       | <b>0.19</b> |
| rs964184          | APOA1-C3-<br>A4-A5 | C        | G        | 7137         | 4.13E-30        | 0.287         | 0.025        | Framingham Heart Study |             |
| rs964184          |                    | C        | G        | 1050         | 2.21E-05        | 0.277         | 0.065        | LOLIPOP                |             |
| rs964184          |                    | C        | G        | 1552         | 3.41E-09        | 0.331         | 0.056        | SUVIMAX                |             |
| rs964184          |                    | C        | G        | 1132         | 3.80E-08        | 0.33          | 0.06         | InCHIANTI              |             |
| rs964184          |                    | C        | G        | 2773         | 2.72E-12        | 0.26          | 0.037        | DGI                    |             |
| rs964184          |                    | C        | G        | 1872         | 2.87E-09        | 0.291         | 0.049        | FUSION Stage 1         |             |
| rs964184          |                    | C        | G        | 4184         | 5.86E-05        | 0.217         | 0.054        | SardiNIA               |             |
| <b>rs964184</b>   |                    | <b>C</b> | <b>G</b> | <b>19700</b> | <b>1.02E-69</b> | <b>0.282</b>  | <b>0.016</b> | <b>Stage 1</b>         | <b>0.7</b>  |
| rs12678919        | LPL                | A        | G        | 7137         | 1.08E-13        | -0.226        | 0.03         | Framingham Heart Study |             |
| rs12678919        |                    | A        | G        | 1050         | 1.69E-05        | -0.306        | 0.071        | LOLIPOP                |             |
| rs12678919        |                    | A        | G        | 1552         | 9.35E-08        | -0.315        | 0.059        | SUVIMAX                |             |
| rs12678919        |                    | A        | G        | 1132         | 2.22E-07        | -0.316        | 0.061        | InCHIANTI              |             |
| rs12678919        |                    | A        | G        | 2773         | 8.00E-07        | -0.225        | 0.046        | DGI                    |             |
| rs12678919        |                    | A        | G        | 1872         | 0.0005134       | -0.198        | 0.057        | FUSION Stage 1         |             |
| rs12678919        |                    | A        | G        | 4184         | 1.66E-06        | -0.206        | 0.043        | SardiNIA               |             |
| <b>rs12678919</b> |                    | <b>A</b> | <b>G</b> | <b>19700</b> | <b>1.45E-41</b> | <b>-0.24</b>  | <b>0.018</b> | <b>Stage 1</b>         | <b>0.59</b> |
| rs1260326         | GCKR               | C        | T        | 7137         | 3.51E-11        | 0.118         | 0.018        | Framingham Heart Study |             |
| rs1260326         |                    | C        | T        | 1050         | 7.42E-05        | 0.179         | 0.045        | LOLIPOP                |             |
| rs1260326         |                    | C        | T        | 1552         | 0.006484        | 0.098         | 0.036        | SUVIMAX                |             |
| rs1260326         |                    | C        | T        | 1132         | 0.003387        | 0.126         | 0.043        | InCHIANTI              |             |
| rs1260326         |                    | C        | T        | 2773         | 2.82E-10        | 0.177         | 0.028        | DGI                    |             |

|                   |                       |          |          |              |                 |               |              |                        |             |
|-------------------|-----------------------|----------|----------|--------------|-----------------|---------------|--------------|------------------------|-------------|
| rs1260326         |                       | C        | T        | 1872         | 6.33E-05        | 0.136         | 0.034        | FUSION Stage 1         |             |
| rs1260326         |                       | C        | T        | 4184         | 7.33E-06        | 0.139         | 0.031        | SardiNIA               |             |
| <b>rs1260326</b>  |                       | <b>C</b> | <b>T</b> | <b>19700</b> | <b>1.66E-33</b> | <b>0.134</b>  | <b>0.011</b> | <b>Stage 1</b>         | <b>0.55</b> |
| rs2954029         | TRIB1                 | A        | T        | 7137         | 2.55E-07        | -0.093        | 0.018        | Framingham Heart Study |             |
| rs2954029         |                       | A        | T        | 1050         | 0.09697         | -0.072        | 0.043        | LOLIPOP                |             |
| rs2954029         |                       | A        | T        | 1552         | 0.1049          | -0.06         | 0.037        | SUVIMAX                |             |
| rs2954029         |                       | A        | T        | 1132         | 0.001692        | -0.135        | 0.043        | InCHIANTI              |             |
| rs2954029         |                       | A        | T        | 2773         | 0.0002402       | -0.098        | 0.027        | DGI                    |             |
| rs2954029         |                       | A        | T        | 1872         | 0.0003919       | -0.117        | 0.033        | FUSION Stage 1         |             |
| rs2954029         |                       | A        | T        | 4184         | 0.008165        | -0.082        | 0.031        | SardiNIA               |             |
| <b>rs2954029</b>  |                       | <b>A</b> | <b>T</b> | <b>19700</b> | <b>1.62E-17</b> | <b>-0.094</b> | <b>0.011</b> | <b>Stage 1</b>         | <b>0.83</b> |
| rs714052          | MLXIPL                | A        | G        | 7137         | 1.29E-08        | -0.158        | 0.028        | Framingham Heart Study |             |
| rs714052          |                       | A        | G        | 1050         | 0.09532         | -0.126        | 0.076        | LOLIPOP                |             |
| rs714052          |                       | A        | G        | 1552         | 0.03747         | -0.129        | 0.062        | SUVIMAX                |             |
| rs714052          |                       | A        | G        | 1132         | 0.01091         | -0.196        | 0.077        | InCHIANTI              |             |
| rs714052          |                       | A        | G        | 2773         | 0.002014        | -0.117        | 0.038        | DGI                    |             |
| rs714052          |                       | A        | G        | 1872         | 0.0002276       | -0.188        | 0.051        | FUSION Stage 1         |             |
| rs714052          |                       | A        | G        | 4184         | 0.006421        | -0.139        | 0.051        | SardiNIA               |             |
| <b>rs714052</b>   |                       | <b>A</b> | <b>G</b> | <b>19700</b> | <b>5.64E-18</b> | <b>-0.149</b> | <b>0.017</b> | <b>Stage 1</b>         | <b>0.71</b> |
| rs7557067         | APOB                  | A        | G        | 7137         | 8.27E-05        | -0.083        | 0.021        | Framingham Heart Study |             |
| rs7557067         |                       | A        | G        | 1050         | 0.002824        | -0.153        | 0.051        | LOLIPOP                |             |
| rs7557067         |                       | A        | G        | 1552         | 0.06379         | -0.076        | 0.041        | SUVIMAX                |             |
| rs7557067         |                       | A        | G        | 1132         | 0.06625         | -0.09         | 0.049        | InCHIANTI              |             |
| rs7557067         |                       | A        | G        | 2773         | 0.003274        | -0.089        | 0.03         | DGI                    |             |
| rs7557067         |                       | A        | G        | 1872         | 0.08368         | -0.064        | 0.037        | FUSION Stage 1         |             |
| rs7557067         |                       | A        | G        | 4184         | 0.0265          | -0.071        | 0.032        | SardiNIA               |             |
| <b>rs7557067</b>  |                       | <b>A</b> | <b>G</b> | <b>19700</b> | <b>1.92E-11</b> | <b>-0.084</b> | <b>0.013</b> | <b>Stage 1</b>         | <b>0.93</b> |
| rs17216525        | CSPG3,<br>CILP2, PBX4 | C        | T        | 7137         | 1.84E-05        | -0.144        | 0.034        | Framingham Heart Study |             |
| rs17216525        |                       | C        | T        | 1050         | 0.09301         | -0.124        | 0.074        | LOLIPOP                |             |
| rs17216525        |                       | C        | T        | 1552         | 0.8392          | 0.014         | 0.069        | SUVIMAX                |             |
| rs17216525        |                       | C        | T        | 1132         | 0.001141        | -0.257        | 0.079        | InCHIANTI              |             |
| rs17216525        |                       | C        | T        | 2773         | 0.02675         | -0.101        | 0.046        | DGI                    |             |
| rs17216525        |                       | C        | T        | 1872         | 0.001344        | -0.202        | 0.063        | FUSION Stage 1         |             |
| rs17216525        |                       | C        | T        | 4184         | 0.0005792       | -0.234        | 0.068        | SardiNIA               |             |
| <b>rs17216525</b> |                       | <b>C</b> | <b>T</b> | <b>19700</b> | <b>4.46E-12</b> | <b>-0.142</b> | <b>0.021</b> | <b>Stage 1</b>         | <b>0.13</b> |
| rs10889353        | ANGPTL3               | A        | C        | 7137         | 0.02092         | -0.043        | 0.019        | Framingham Heart Study |             |



|                   |          |          |              |                 |              |              |                |            |
|-------------------|----------|----------|--------------|-----------------|--------------|--------------|----------------|------------|
| rs10889353        | A        | C        | 1050         | 0.7787          | -0.013       | 0.046        | LOLIPOP        |            |
| rs10889353        | A        | C        | 1552         | 0.001128        | -0.127       | 0.039        | SUVIMAX        |            |
| rs10889353        | A        | C        | 1132         | 0.4212          | -0.037       | 0.046        | InCHIANTI      |            |
| rs10889353        | A        | C        | 2773         | 0.005378        | -0.078       | 0.028        | DGI            |            |
| rs10889353        | A        | C        | 1872         | 0.0485          | -0.073       | 0.037        | FUSION Stage 1 |            |
| rs10889353        | A        | C        | 4184         | 0.06546         | -0.07        | 0.038        | SardiNIA       |            |
| <b>rs10889353</b> | <b>A</b> | <b>C</b> | <b>19700</b> | <b>3.08E-07</b> | <b>-0.06</b> | <b>0.012</b> | <b>Stage 1</b> | <b>0.5</b> |

**Supplementary Table 7. Association of SNPs with specialized lipoprotein-related phenotypes in Framingham Heart Study 2<sup>nd</sup> generation participants**

| Phenotype                             | SNP        | Chr | Position | Locus              | n    | beta  | se   | P for association | MAF  |
|---------------------------------------|------------|-----|----------|--------------------|------|-------|------|-------------------|------|
| apo A-I                               | rs10401969 | 19  | 19268718 | CSPG3, CILP2, PBX4 | 3023 | 0.02  | 0.06 | 7.7E-01           | 0.07 |
| apo B                                 | rs10401969 | 19  | 19268718 | CSPG3, CILP2, PBX4 | 3023 | -0.01 | 0.06 | 8.9E-01           | 0.07 |
| apo C-III                             | rs10401969 | 19  | 19268718 | CSPG3, CILP2, PBX4 | 2486 | -0.13 | 0.07 | 4.8E-02           | 0.06 |
| total chol exam 1                     | rs10401969 | 19  | 19268718 | CSPG3, CILP2, PBX4 | 3496 | -0.15 | 0.05 | 6.5E-03           | 0.06 |
| total chol/hdl chol ratio exam 1      | rs10401969 | 19  | 19268718 | CSPG3, CILP2, PBX4 | 3481 | -0.10 | 0.05 | 7.2E-02           | 0.06 |
| hdl chol exam 1                       | rs10401969 | 19  | 19268718 | CSPG3, CILP2, PBX4 | 3495 | 0.01  | 0.06 | 8.4E-01           | 0.06 |
| hdl-2                                 | rs10401969 | 19  | 19268718 | CSPG3, CILP2, PBX4 | 3166 | 0.07  | 0.06 | 2.2E-01           | 0.06 |
| hdl-3                                 | rs10401969 | 19  | 19268718 | CSPG3, CILP2, PBX4 | 3009 | 0.01  | 0.06 | 9.0E-01           | 0.07 |
| intermediate HDL concentration - NMR  | rs10401969 | 19  | 19268718 | CSPG3, CILP2, PBX4 | 2744 | 0.00  | 0.06 | 9.6E-01           | 0.07 |
| large HDL concentration - NMR         | rs10401969 | 19  | 19268718 | CSPG3, CILP2, PBX4 | 2744 | -0.07 | 0.06 | 2.7E-01           | 0.07 |
| small HDL concentration - NMR         | rs10401969 | 19  | 19268718 | CSPG3, CILP2, PBX4 | 2744 | 0.07  | 0.06 | 2.6E-01           | 0.07 |
| HDL size - NMR                        | rs10401969 | 19  | 19268718 | CSPG3, CILP2, PBX4 | 2744 | -0.08 | 0.06 | 2.3E-01           | 0.07 |
| IDL concentration - NMR               | rs10401969 | 19  | 19268718 | CSPG3, CILP2, PBX4 | 2744 | -0.04 | 0.06 | 5.3E-01           | 0.07 |
| ldl chol exam 1                       | rs10401969 | 19  | 19268718 | CSPG3, CILP2, PBX4 | 3458 | -0.12 | 0.05 | 2.3E-02           | 0.06 |
| large LDL concentration - NMR         | rs10401969 | 19  | 19268718 | CSPG3, CILP2, PBX4 | 2744 | 0.02  | 0.06 | 7.2E-01           | 0.07 |
| small LDL concentration - NMR         | rs10401969 | 19  | 19268718 | CSPG3, CILP2, PBX4 | 2744 | 0.00  | 0.06 | 9.6E-01           | 0.07 |
| LDL size - NMR                        | rs10401969 | 19  | 19268718 | CSPG3, CILP2, PBX4 | 2744 | 0.00  | 0.06 | 1.0E+00           | 0.07 |
| lipoprotein (a)                       | rs10401969 | 19  | 19268718 | CSPG3, CILP2, PBX4 | 2193 | 0.04  | 0.07 | 6.0E-01           | 0.06 |
| apo E                                 | rs10401969 | 19  | 19268718 | CSPG3, CILP2, PBX4 | 2262 | -0.02 | 0.07 | 7.6E-01           | 0.07 |
| remnant lipoprotein chol              | rs10401969 | 19  | 19268718 | CSPG3, CILP2, PBX4 | 2470 | -0.07 | 0.07 | 2.8E-01           | 0.06 |
| remnant lipoprotein triglycerides     | rs10401969 | 19  | 19268718 | CSPG3, CILP2, PBX4 | 2387 | 0.00  | 0.07 | 1.0E+00           | 0.06 |
| triglycerides exam 1                  | rs10401969 | 19  | 19268718 | CSPG3, CILP2, PBX4 | 3494 | -0.10 | 0.06 | 8.1E-02           | 0.06 |
| triglycerides/hdl ratio exam 1        | rs10401969 | 19  | 19268718 | CSPG3, CILP2, PBX4 | 3480 | -0.08 | 0.06 | 1.4E-01           | 0.06 |
| intermediate VLDL concentration - NMR | rs10401969 | 19  | 19268718 | CSPG3, CILP2, PBX4 | 2897 | -0.11 | 0.06 | 8.5E-02           | 0.06 |
| large VLDL concentration - NMR        | rs10401969 | 19  | 19268718 | CSPG3, CILP2, PBX4 | 2408 | -0.02 | 0.07 | 7.7E-01           | 0.07 |
| small VLDL concentration - NMR        | rs10401969 | 19  | 19268718 | CSPG3, CILP2, PBX4 | 2744 | -0.04 | 0.06 | 4.9E-01           | 0.07 |
| VLDL size - NMR                       | rs10401969 | 19  | 19268718 | CSPG3, CILP2, PBX4 | 2744 | 0.03  | 0.06 | 6.5E-01           | 0.07 |
| apo A-I                               | rs10468017 | 15  | 56465804 | LIPC               | 3023 | 0.11  | 0.03 | 2.6E-04           | 0.30 |
| apo B                                 | rs10468017 | 15  | 56465804 | LIPC               | 3023 | 0.04  | 0.03 | 1.8E-01           | 0.30 |
| apo C-III                             | rs10468017 | 15  | 56465804 | LIPC               | 2486 | 0.03  | 0.03 | 3.9E-01           | 0.31 |
| total chol exam 1                     | rs10468017 | 15  | 56465804 | LIPC               | 3496 | 0.12  | 0.03 | 5.1E-06           | 0.31 |
| total chol/hdl chol ratio exam 1      | rs10468017 | 15  | 56465804 | LIPC               | 3481 | -0.02 | 0.03 | 4.9E-01           | 0.31 |
| hdl chol exam 1                       | rs10468017 | 15  | 56465804 | LIPC               | 3495 | 0.10  | 0.03 | 1.4E-04           | 0.31 |
| hdl-2                                 | rs10468017 | 15  | 56465804 | LIPC               | 3166 | 0.13  | 0.03 | 3.8E-06           | 0.31 |
| hdl-3                                 | rs10468017 | 15  | 56465804 | LIPC               | 3009 | 0.07  | 0.03 | 1.3E-02           | 0.31 |
| intermediate HDL concentration - NMR  | rs10468017 | 15  | 56465804 | LIPC               | 2744 | -0.08 | 0.03 | 9.2E-03           | 0.30 |
| large HDL concentration - NMR         | rs10468017 | 15  | 56465804 | LIPC               | 2744 | 0.18  | 0.03 | 2.9E-09           | 0.30 |
| small HDL concentration - NMR         | rs10468017 | 15  | 56465804 | LIPC               | 2744 | -0.07 | 0.03 | 3.4E-02           | 0.30 |

|                                       |            |    |          |         |      |       |      |         |      |
|---------------------------------------|------------|----|----------|---------|------|-------|------|---------|------|
| HDL size - NMR                        | rs10468017 | 15 | 56465804 | LIPC    | 2744 | 0.18  | 0.03 | 1.8E-09 | 0.30 |
| IDL concentration - NMR               | rs10468017 | 15 | 56465804 | LIPC    | 2744 | 0.10  | 0.03 | 1.1E-03 | 0.30 |
| ldl chol exam 1                       | rs10468017 | 15 | 56465804 | LIPC    | 3458 | 0.07  | 0.03 | 1.2E-02 | 0.31 |
| large LDL concentration - NMR         | rs10468017 | 15 | 56465804 | LIPC    | 2744 | 0.10  | 0.03 | 1.9E-03 | 0.30 |
| small LDL concentration - NMR         | rs10468017 | 15 | 56465804 | LIPC    | 2744 | -0.02 | 0.03 | 6.1E-01 | 0.30 |
| LDL size - NMR                        | rs10468017 | 15 | 56465804 | LIPC    | 2744 | 0.09  | 0.03 | 5.1E-03 | 0.30 |
| lipoprotein (a)                       | rs10468017 | 15 | 56465804 | LIPC    | 2193 | 0.04  | 0.03 | 2.0E-01 | 0.31 |
| apo E                                 | rs10468017 | 15 | 56465804 | LIPC    | 2262 | 0.01  | 0.03 | 7.1E-01 | 0.31 |
| remnant lipoprotein chol              | rs10468017 | 15 | 56465804 | LIPC    | 2470 | 0.04  | 0.03 | 2.4E-01 | 0.31 |
| remnant lipoprotein triglycerides     | rs10468017 | 15 | 56465804 | LIPC    | 2387 | -0.01 | 0.03 | 8.7E-01 | 0.31 |
| triglycerides exam 1                  | rs10468017 | 15 | 56465804 | LIPC    | 3494 | 0.07  | 0.03 | 8.5E-03 | 0.31 |
| triglycerides/hdl ratio exam 1        | rs10468017 | 15 | 56465804 | LIPC    | 3480 | 0.02  | 0.03 | 3.9E-01 | 0.31 |
| intermediate VLDL concentration - NMR | rs10468017 | 15 | 56465804 | LIPC    | 2897 | -0.02 | 0.03 | 4.1E-01 | 0.30 |
| large VLDL concentration - NMR        | rs10468017 | 15 | 56465804 | LIPC    | 2408 | -0.01 | 0.03 | 8.7E-01 | 0.30 |
| small VLDL concentration - NMR        | rs10468017 | 15 | 56465804 | LIPC    | 2744 | 0.14  | 0.03 | 8.1E-06 | 0.30 |
| VLDL size - NMR                       | rs10468017 | 15 | 56465804 | LIPC    | 2744 | -0.07 | 0.03 | 1.6E-02 | 0.30 |
| apo A-I                               | rs10889353 | 1  | 62890784 | ANGPTL3 | 3023 | -0.01 | 0.03 | 5.9E-01 | 0.33 |
| apo B                                 | rs10889353 | 1  | 62890784 | ANGPTL3 | 3023 | -0.07 | 0.03 | 1.4E-02 | 0.33 |
| apo C-III                             | rs10889353 | 1  | 62890784 | ANGPTL3 | 2486 | -0.09 | 0.03 | 3.9E-03 | 0.33 |
| total chol exam 1                     | rs10889353 | 1  | 62890784 | ANGPTL3 | 3496 | -0.09 | 0.03 | 2.4E-04 | 0.33 |
| total chol/hdl chol ratio exam 1      | rs10889353 | 1  | 62890784 | ANGPTL3 | 3481 | -0.02 | 0.03 | 4.2E-01 | 0.33 |
| hdl chol exam 1                       | rs10889353 | 1  | 62890784 | ANGPTL3 | 3495 | -0.05 | 0.03 | 4.1E-02 | 0.33 |
| hdl-2                                 | rs10889353 | 1  | 62890784 | ANGPTL3 | 3166 | 0.03  | 0.03 | 2.4E-01 | 0.33 |
| hdl-3                                 | rs10889353 | 1  | 62890784 | ANGPTL3 | 3009 | -0.03 | 0.03 | 3.0E-01 | 0.33 |
| intermediate HDL concentration - NMR  | rs10889353 | 1  | 62890784 | ANGPTL3 | 2744 | -0.08 | 0.03 | 7.8E-03 | 0.33 |
| large HDL concentration - NMR         | rs10889353 | 1  | 62890784 | ANGPTL3 | 2744 | -0.03 | 0.03 | 3.7E-01 | 0.33 |
| small HDL concentration - NMR         | rs10889353 | 1  | 62890784 | ANGPTL3 | 2744 | 0.07  | 0.03 | 1.2E-02 | 0.33 |
| HDL size - NMR                        | rs10889353 | 1  | 62890784 | ANGPTL3 | 2744 | -0.02 | 0.03 | 5.6E-01 | 0.33 |
| IDL concentration - NMR               | rs10889353 | 1  | 62890784 | ANGPTL3 | 2744 | -0.01 | 0.03 | 8.5E-01 | 0.33 |
| ldl chol exam 1                       | rs10889353 | 1  | 62890784 | ANGPTL3 | 3458 | -0.06 | 0.03 | 1.6E-02 | 0.33 |
| large LDL concentration - NMR         | rs10889353 | 1  | 62890784 | ANGPTL3 | 2744 | -0.05 | 0.03 | 7.6E-02 | 0.33 |
| small LDL concentration - NMR         | rs10889353 | 1  | 62890784 | ANGPTL3 | 2744 | -0.03 | 0.03 | 3.9E-01 | 0.33 |
| LDL size - NMR                        | rs10889353 | 1  | 62890784 | ANGPTL3 | 2744 | -0.03 | 0.03 | 3.7E-01 | 0.33 |
| lipoprotein (a)                       | rs10889353 | 1  | 62890784 | ANGPTL3 | 2193 | 0.01  | 0.03 | 7.0E-01 | 0.33 |
| apo E                                 | rs10889353 | 1  | 62890784 | ANGPTL3 | 2262 | -0.04 | 0.03 | 2.3E-01 | 0.33 |
| remnant lipoprotein chol              | rs10889353 | 1  | 62890784 | ANGPTL3 | 2470 | -0.10 | 0.03 | 1.4E-03 | 0.33 |
| remnant lipoprotein triglycerides     | rs10889353 | 1  | 62890784 | ANGPTL3 | 2387 | -0.06 | 0.03 | 5.4E-02 | 0.33 |
| triglycerides exam 1                  | rs10889353 | 1  | 62890784 | ANGPTL3 | 3494 | -0.05 | 0.03 | 4.1E-02 | 0.33 |
| triglycerides/hdl ratio exam 1        | rs10889353 | 1  | 62890784 | ANGPTL3 | 3480 | -0.03 | 0.03 | 3.0E-01 | 0.33 |
| intermediate VLDL concentration - NMR | rs10889353 | 1  | 62890784 | ANGPTL3 | 2897 | -0.05 | 0.03 | 9.2E-02 | 0.33 |
| large VLDL concentration - NMR        | rs10889353 | 1  | 62890784 | ANGPTL3 | 2408 | 0.02  | 0.03 | 6.0E-01 | 0.33 |
| small VLDL concentration - NMR        | rs10889353 | 1  | 62890784 | ANGPTL3 | 2744 | -0.11 | 0.03 | 7.7E-05 | 0.33 |

|                                       |            |   |          |         |      |       |      |         |      |
|---------------------------------------|------------|---|----------|---------|------|-------|------|---------|------|
| VLDL size - NMR                       | rs10889353 | 1 | 62890784 | ANGPTL3 | 2744 | 0.04  | 0.03 | 1.2E-01 | 0.33 |
| apo A-I                               | rs11206510 | 1 | 55268627 | PCSK9   | 3023 | 0.01  | 0.04 | 7.1E-01 | 0.18 |
| apo B                                 | rs11206510 | 1 | 55268627 | PCSK9   | 3023 | -0.03 | 0.04 | 4.7E-01 | 0.18 |
| apo C-III                             | rs11206510 | 1 | 55268627 | PCSK9   | 2486 | -0.03 | 0.04 | 4.8E-01 | 0.17 |
| total chol exam 1                     | rs11206510 | 1 | 55268627 | PCSK9   | 3496 | -0.08 | 0.03 | 1.6E-02 | 0.18 |
| total chol/hdl chol ratio exam 1      | rs11206510 | 1 | 55268627 | PCSK9   | 3481 | -0.08 | 0.03 | 2.0E-02 | 0.17 |
| hdl chol exam 1                       | rs11206510 | 1 | 55268627 | PCSK9   | 3495 | 0.03  | 0.04 | 3.5E-01 | 0.17 |
| hdl-2                                 | rs11206510 | 1 | 55268627 | PCSK9   | 3166 | 0.04  | 0.04 | 3.2E-01 | 0.18 |
| hdl-3                                 | rs11206510 | 1 | 55268627 | PCSK9   | 3009 | 0.00  | 0.04 | 9.4E-01 | 0.18 |
| intermediate HDL concentration - NMR  | rs11206510 | 1 | 55268627 | PCSK9   | 2744 | 0.04  | 0.04 | 2.8E-01 | 0.18 |
| large HDL concentration - NMR         | rs11206510 | 1 | 55268627 | PCSK9   | 2744 | 0.00  | 0.04 | 9.9E-01 | 0.18 |
| small HDL concentration - NMR         | rs11206510 | 1 | 55268627 | PCSK9   | 2744 | -0.01 | 0.04 | 8.6E-01 | 0.18 |
| HDL size - NMR                        | rs11206510 | 1 | 55268627 | PCSK9   | 2744 | 0.00  | 0.04 | 9.2E-01 | 0.18 |
| IDL concentration - NMR               | rs11206510 | 1 | 55268627 | PCSK9   | 2744 | 0.03  | 0.04 | 3.9E-01 | 0.18 |
| ldl chol exam 1                       | rs11206510 | 1 | 55268627 | PCSK9   | 3458 | -0.10 | 0.03 | 3.9E-03 | 0.17 |
| large LDL concentration - NMR         | rs11206510 | 1 | 55268627 | PCSK9   | 2744 | -0.04 | 0.04 | 3.6E-01 | 0.18 |
| small LDL concentration - NMR         | rs11206510 | 1 | 55268627 | PCSK9   | 2744 | -0.02 | 0.04 | 7.0E-01 | 0.18 |
| LDL size - NMR                        | rs11206510 | 1 | 55268627 | PCSK9   | 2744 | -0.01 | 0.04 | 7.7E-01 | 0.18 |
| lipoprotein (a)                       | rs11206510 | 1 | 55268627 | PCSK9   | 2193 | -0.10 | 0.04 | 2.4E-02 | 0.18 |
| apo E                                 | rs11206510 | 1 | 55268627 | PCSK9   | 2262 | 0.04  | 0.04 | 3.8E-01 | 0.17 |
| remnant lipoprotein chol              | rs11206510 | 1 | 55268627 | PCSK9   | 2470 | 0.03  | 0.04 | 4.0E-01 | 0.18 |
| remnant lipoprotein triglycerides     | rs11206510 | 1 | 55268627 | PCSK9   | 2387 | 0.05  | 0.04 | 2.4E-01 | 0.18 |
| triglycerides exam 1                  | rs11206510 | 1 | 55268627 | PCSK9   | 3494 | -0.05 | 0.04 | 1.3E-01 | 0.17 |
| triglycerides/hdl ratio exam 1        | rs11206510 | 1 | 55268627 | PCSK9   | 3480 | -0.06 | 0.04 | 1.1E-01 | 0.17 |
| intermediate VLDL concentration - NMR | rs11206510 | 1 | 55268627 | PCSK9   | 2897 | 0.01  | 0.04 | 8.0E-01 | 0.18 |
| large VLDL concentration - NMR        | rs11206510 | 1 | 55268627 | PCSK9   | 2408 | -0.02 | 0.04 | 6.1E-01 | 0.18 |
| small VLDL concentration - NMR        | rs11206510 | 1 | 55268627 | PCSK9   | 2744 | -0.05 | 0.04 | 2.4E-01 | 0.18 |
| VLDL size - NMR                       | rs11206510 | 1 | 55268627 | PCSK9   | 2744 | 0.00  | 0.04 | 9.4E-01 | 0.18 |
| hdl chol exam 1                       | rs11591147 | 1 | 55278235 | PCSK9   | 2273 | -0.10 | 0.12 | 3.9E-01 | 0.02 |
| hdl-3                                 | rs11591147 | 1 | 55278235 | PCSK9   | 1999 | -0.04 | 0.13 | 7.7E-01 | 0.02 |
| hdl-2                                 | rs11591147 | 1 | 55278235 | PCSK9   | 2095 | -0.24 | 0.13 | 5.6E-02 | 0.02 |
| total chol exam 1                     | rs11591147 | 1 | 55278235 | PCSK9   | 2273 | -0.59 | 0.12 | 1.4E-06 | 0.02 |
| total chol/hdl chol ratio exam 1      | rs11591147 | 1 | 55278235 | PCSK9   | 2263 | -0.28 | 0.12 | 2.3E-02 | 0.02 |
| ldl chol exam 1                       | rs11591147 | 1 | 55278235 | PCSK9   | 2249 | -0.54 | 0.12 | 9.0E-06 | 0.02 |
| lipoprotein (a)                       | rs11591147 | 1 | 55278235 | PCSK9   | 1468 | -0.28 | 0.14 | 5.3E-02 | 0.02 |
| triglycerides exam 1                  | rs11591147 | 1 | 55278235 | PCSK9   | 2272 | -0.11 | 0.12 | 3.5E-01 | 0.02 |
| triglycerides/hdl ratio exam 1        | rs11591147 | 1 | 55278235 | PCSK9   | 2263 | -0.06 | 0.12 | 6.2E-01 | 0.02 |
| HDL size - NMR                        | rs11591147 | 1 | 55278235 | PCSK9   | 1814 | -0.16 | 0.13 | 2.1E-01 | 0.02 |
| LDL size - NMR                        | rs11591147 | 1 | 55278235 | PCSK9   | 1814 | -0.01 | 0.13 | 9.2E-01 | 0.02 |
| VLDL size - NMR                       | rs11591147 | 1 | 55278235 | PCSK9   | 1814 | 0.16  | 0.13 | 2.3E-01 | 0.02 |
| small HDL concentration - NMR         | rs11591147 | 1 | 55278235 | PCSK9   | 1814 | -0.23 | 0.13 | 8.6E-02 | 0.02 |
| intermediate HDL concentration - NMR  | rs11591147 | 1 | 55278235 | PCSK9   | 1814 | 0.28  | 0.13 | 3.5E-02 | 0.02 |

|                                       |            |   |          |       |      |       |      |         |      |
|---------------------------------------|------------|---|----------|-------|------|-------|------|---------|------|
| large HDL concentration - NMR         | rs11591147 | 1 | 55278235 | PCSK9 | 1814 | -0.14 | 0.13 | 2.7E-01 | 0.02 |
| small LDL concentration - NMR         | rs11591147 | 1 | 55278235 | PCSK9 | 1814 | -0.21 | 0.13 | 1.2E-01 | 0.02 |
| large LDL concentration - NMR         | rs11591147 | 1 | 55278235 | PCSK9 | 1814 | -0.14 | 0.13 | 2.8E-01 | 0.02 |
| small VLDL concentration - NMR        | rs11591147 | 1 | 55278235 | PCSK9 | 1814 | -0.12 | 0.13 | 3.3E-01 | 0.02 |
| intermediate VLDL concentration - NMR | rs11591147 | 1 | 55278235 | PCSK9 | 1907 | 0.07  | 0.13 | 5.7E-01 | 0.02 |
| IDL concentration - NMR               | rs11591147 | 1 | 55278235 | PCSK9 | 1814 | -0.22 | 0.13 | 7.9E-02 | 0.02 |
| large VLDL concentration - NMR        | rs11591147 | 1 | 55278235 | PCSK9 | 1605 | -0.02 | 0.14 | 9.0E-01 | 0.02 |
| remnant lipoprotein chol              | rs11591147 | 1 | 55278235 | PCSK9 | 1616 | -0.17 | 0.14 | 2.1E-01 | 0.02 |
| remnant lipoprotein triglycerides     | rs11591147 | 1 | 55278235 | PCSK9 | 1561 | -0.05 | 0.14 | 7.2E-01 | 0.02 |
| apo E                                 | rs11591147 | 1 | 55278235 | PCSK9 | 1551 | 0.03  | 0.15 | 8.5E-01 | 0.02 |
| apo A-I                               | rs11591147 | 1 | 55278235 | PCSK9 | 2008 | -0.06 | 0.12 | 6.3E-01 | 0.02 |
| apo B                                 | rs11591147 | 1 | 55278235 | PCSK9 | 2008 | -0.37 | 0.13 | 3.4E-03 | 0.02 |
| apo C-III                             | rs11591147 | 1 | 55278235 | PCSK9 | 1696 | 0.24  | 0.14 | 1.0E-01 | 0.02 |
| apo A-I                               | rs1260326  | 2 | 27584444 | GCKR  | 3023 | 0.04  | 0.03 | 1.4E-01 | 0.45 |
| apo B                                 | rs1260326  | 2 | 27584444 | GCKR  | 3023 | 0.04  | 0.03 | 1.0E-01 | 0.45 |
| apo C-III                             | rs1260326  | 2 | 27584444 | GCKR  | 2486 | 0.19  | 0.03 | 8.7E-12 | 0.45 |
| total chol exam 1                     | rs1260326  | 2 | 27584444 | GCKR  | 3496 | 0.08  | 0.02 | 8.0E-04 | 0.45 |
| total chol/hdl chol ratio exam 1      | rs1260326  | 2 | 27584444 | GCKR  | 3481 | 0.02  | 0.02 | 3.9E-01 | 0.45 |
| hdl chol exam 1                       | rs1260326  | 2 | 27584444 | GCKR  | 3495 | 0.03  | 0.02 | 1.8E-01 | 0.45 |
| hdl-2                                 | rs1260326  | 2 | 27584444 | GCKR  | 3166 | 0.00  | 0.03 | 9.6E-01 | 0.45 |
| hdl-3                                 | rs1260326  | 2 | 27584444 | GCKR  | 3009 | 0.05  | 0.03 | 7.6E-02 | 0.45 |
| intermediate HDL concentration - NMR  | rs1260326  | 2 | 27584444 | GCKR  | 2744 | 0.07  | 0.03 | 1.7E-02 | 0.45 |
| large HDL concentration - NMR         | rs1260326  | 2 | 27584444 | GCKR  | 2744 | 0.02  | 0.03 | 4.6E-01 | 0.45 |
| small HDL concentration - NMR         | rs1260326  | 2 | 27584444 | GCKR  | 2744 | -0.03 | 0.03 | 3.0E-01 | 0.45 |
| HDL size - NMR                        | rs1260326  | 2 | 27584444 | GCKR  | 2744 | 0.02  | 0.03 | 5.3E-01 | 0.45 |
| IDL concentration - NMR               | rs1260326  | 2 | 27584444 | GCKR  | 2744 | -0.02 | 0.03 | 4.7E-01 | 0.45 |
| ldl chol exam 1                       | rs1260326  | 2 | 27584444 | GCKR  | 3458 | 0.04  | 0.02 | 9.6E-02 | 0.45 |
| large LDL concentration - NMR         | rs1260326  | 2 | 27584444 | GCKR  | 2744 | 0.03  | 0.03 | 3.5E-01 | 0.45 |
| small LDL concentration - NMR         | rs1260326  | 2 | 27584444 | GCKR  | 2744 | 0.02  | 0.03 | 4.8E-01 | 0.45 |
| LDL size - NMR                        | rs1260326  | 2 | 27584444 | GCKR  | 2744 | -0.01 | 0.03 | 8.5E-01 | 0.45 |
| lipoprotein (a)                       | rs1260326  | 2 | 27584444 | GCKR  | 2193 | -0.06 | 0.03 | 6.3E-02 | 0.45 |
| apo E                                 | rs1260326  | 2 | 27584444 | GCKR  | 2262 | 0.08  | 0.03 | 6.4E-03 | 0.45 |
| remnant lipoprotein chol              | rs1260326  | 2 | 27584444 | GCKR  | 2470 | 0.08  | 0.03 | 6.2E-03 | 0.45 |
| remnant lipoprotein triglycerides     | rs1260326  | 2 | 27584444 | GCKR  | 2387 | 0.09  | 0.03 | 3.8E-03 | 0.45 |
| triglycerides exam 1                  | rs1260326  | 2 | 27584444 | GCKR  | 3494 | 0.10  | 0.02 | 5.8E-05 | 0.45 |
| triglycerides/hdl ratio exam 1        | rs1260326  | 2 | 27584444 | GCKR  | 3480 | 0.07  | 0.02 | 4.7E-03 | 0.45 |
| intermediate VLDL concentration - NMR | rs1260326  | 2 | 27584444 | GCKR  | 2897 | 0.11  | 0.03 | 2.5E-05 | 0.46 |
| large VLDL concentration - NMR        | rs1260326  | 2 | 27584444 | GCKR  | 2408 | 0.12  | 0.03 | 6.3E-05 | 0.46 |
| small VLDL concentration - NMR        | rs1260326  | 2 | 27584444 | GCKR  | 2744 | 0.02  | 0.03 | 4.5E-01 | 0.45 |
| VLDL size - NMR                       | rs1260326  | 2 | 27584444 | GCKR  | 2744 | 0.10  | 0.03 | 4.1E-04 | 0.45 |
| apo A-I                               | rs12678919 | 8 | 19888502 | LPL   | 3023 | 0.13  | 0.05 | 5.2E-03 | 0.10 |
| apo B                                 | rs12678919 | 8 | 19888502 | LPL   | 3023 | 0.00  | 0.05 | 9.6E-01 | 0.10 |

|                                       |            |   |           |                      |      |       |      |         |      |
|---------------------------------------|------------|---|-----------|----------------------|------|-------|------|---------|------|
| apo C-III                             | rs12678919 | 8 | 19888502  | LPL                  | 2486 | -0.07 | 0.05 | 1.3E-01 | 0.10 |
| total chol exam 1                     | rs12678919 | 8 | 19888502  | LPL                  | 3496 | 0.04  | 0.04 | 3.3E-01 | 0.10 |
| total chol/hdl chol ratio exam 1      | rs12678919 | 8 | 19888502  | LPL                  | 3481 | -0.14 | 0.04 | 1.0E-03 | 0.10 |
| hdl chol exam 1                       | rs12678919 | 8 | 19888502  | LPL                  | 3495 | 0.19  | 0.04 | 6.7E-06 | 0.10 |
| hdl-2                                 | rs12678919 | 8 | 19888502  | LPL                  | 3166 | 0.16  | 0.04 | 1.8E-04 | 0.10 |
| hdl-3                                 | rs12678919 | 8 | 19888502  | LPL                  | 3009 | 0.17  | 0.05 | 1.2E-04 | 0.10 |
| intermediate HDL concentration - NMR  | rs12678919 | 8 | 19888502  | LPL                  | 2744 | -0.07 | 0.05 | 1.5E-01 | 0.10 |
| large HDL concentration - NMR         | rs12678919 | 8 | 19888502  | LPL                  | 2744 | 0.16  | 0.05 | 7.9E-04 | 0.10 |
| small HDL concentration - NMR         | rs12678919 | 8 | 19888502  | LPL                  | 2744 | 0.00  | 0.05 | 1.0E+00 | 0.10 |
| HDL size - NMR                        | rs12678919 | 8 | 19888502  | LPL                  | 2744 | 0.16  | 0.05 | 9.0E-04 | 0.10 |
| IDL concentration - NMR               | rs12678919 | 8 | 19888502  | LPL                  | 2744 | 0.02  | 0.05 | 7.4E-01 | 0.10 |
| ldl chol exam 1                       | rs12678919 | 8 | 19888502  | LPL                  | 3458 | 0.03  | 0.04 | 5.4E-01 | 0.10 |
| large LDL concentration - NMR         | rs12678919 | 8 | 19888502  | LPL                  | 2744 | 0.12  | 0.05 | 1.2E-02 | 0.10 |
| small LDL concentration - NMR         | rs12678919 | 8 | 19888502  | LPL                  | 2744 | -0.12 | 0.05 | 9.6E-03 | 0.10 |
| LDL size - NMR                        | rs12678919 | 8 | 19888502  | LPL                  | 2744 | 0.10  | 0.05 | 2.8E-02 | 0.10 |
| lipoprotein (a)                       | rs12678919 | 8 | 19888502  | LPL                  | 2193 | 0.06  | 0.05 | 2.6E-01 | 0.10 |
| apo E                                 | rs12678919 | 8 | 19888502  | LPL                  | 2262 | 0.07  | 0.05 | 1.7E-01 | 0.10 |
| remnant lipoprotein chol              | rs12678919 | 8 | 19888502  | LPL                  | 2470 | -0.03 | 0.05 | 5.8E-01 | 0.10 |
| remnant lipoprotein triglycerides     | rs12678919 | 8 | 19888502  | LPL                  | 2387 | -0.06 | 0.05 | 2.6E-01 | 0.10 |
| triglycerides exam 1                  | rs12678919 | 8 | 19888502  | LPL                  | 3494 | -0.14 | 0.04 | 7.9E-04 | 0.10 |
| triglycerides/hdl ratio exam 1        | rs12678919 | 8 | 19888502  | LPL                  | 3480 | -0.18 | 0.04 | 1.8E-05 | 0.10 |
| intermediate VLDL concentration - NMR | rs12678919 | 8 | 19888502  | LPL                  | 2897 | -0.19 | 0.05 | 2.5E-05 | 0.10 |
| large VLDL concentration - NMR        | rs12678919 | 8 | 19888502  | LPL                  | 2408 | -0.09 | 0.05 | 6.9E-02 | 0.10 |
| small VLDL concentration - NMR        | rs12678919 | 8 | 19888502  | LPL                  | 2744 | -0.03 | 0.05 | 5.5E-01 | 0.10 |
| VLDL size - NMR                       | rs12678919 | 8 | 19888502  | LPL                  | 2744 | -0.07 | 0.05 | 1.4E-01 | 0.10 |
| apo A-I                               | rs12740374 | 1 | 109619113 | CELSR2, PSRC1, SORT1 | 3023 | 0.02  | 0.03 | 5.7E-01 | 0.22 |
| apo B                                 | rs12740374 | 1 | 109619113 | CELSR2, PSRC1, SORT1 | 3023 | -0.19 | 0.03 | 1.2E-08 | 0.22 |
| apo C-III                             | rs12740374 | 1 | 109619113 | CELSR2, PSRC1, SORT1 | 2486 | 0.05  | 0.04 | 1.3E-01 | 0.22 |
| total chol exam 1                     | rs12740374 | 1 | 109619113 | CELSR2, PSRC1, SORT1 | 3496 | -0.19 | 0.03 | 9.2E-11 | 0.21 |
| total chol/hdl chol ratio exam 1      | rs12740374 | 1 | 109619113 | CELSR2, PSRC1, SORT1 | 3481 | -0.15 | 0.03 | 1.8E-06 | 0.21 |
| hdl chol exam 1                       | rs12740374 | 1 | 109619113 | CELSR2, PSRC1, SORT1 | 3495 | 0.04  | 0.03 | 2.1E-01 | 0.21 |
| hdl-2                                 | rs12740374 | 1 | 109619113 | CELSR2, PSRC1, SORT1 | 3166 | 0.02  | 0.03 | 6.0E-01 | 0.21 |
| hdl-3                                 | rs12740374 | 1 | 109619113 | CELSR2, PSRC1, SORT1 | 3009 | 0.06  | 0.03 | 6.5E-02 | 0.22 |
| intermediate HDL concentration - NMR  | rs12740374 | 1 | 109619113 | CELSR2, PSRC1, SORT1 | 2744 | 0.06  | 0.03 | 8.7E-02 | 0.22 |
| large HDL concentration - NMR         | rs12740374 | 1 | 109619113 | CELSR2, PSRC1, SORT1 | 2744 | 0.02  | 0.03 | 6.5E-01 | 0.22 |
| small HDL concentration - NMR         | rs12740374 | 1 | 109619113 | CELSR2, PSRC1, SORT1 | 2744 | -0.07 | 0.03 | 4.8E-02 | 0.22 |
| HDL size - NMR                        | rs12740374 | 1 | 109619113 | CELSR2, PSRC1, SORT1 | 2744 | -0.01 | 0.03 | 7.4E-01 | 0.22 |
| IDL concentration - NMR               | rs12740374 | 1 | 109619113 | CELSR2, PSRC1, SORT1 | 2744 | -0.03 | 0.03 | 4.4E-01 | 0.22 |
| ldl chol exam 1                       | rs12740374 | 1 | 109619113 | CELSR2, PSRC1, SORT1 | 3458 | -0.21 | 0.03 | 6.2E-12 | 0.22 |
| large LDL concentration - NMR         | rs12740374 | 1 | 109619113 | CELSR2, PSRC1, SORT1 | 2744 | -0.10 | 0.03 | 4.2E-03 | 0.22 |
| small LDL concentration - NMR         | rs12740374 | 1 | 109619113 | CELSR2, PSRC1, SORT1 | 2744 | -0.08 | 0.03 | 1.9E-02 | 0.22 |
| LDL size - NMR                        | rs12740374 | 1 | 109619113 | CELSR2, PSRC1, SORT1 | 2744 | 0.03  | 0.03 | 4.0E-01 | 0.22 |

|                                       |            |    |           |                      |      |       |      |         |      |
|---------------------------------------|------------|----|-----------|----------------------|------|-------|------|---------|------|
| lipoprotein (a)                       | rs12740374 | 1  | 109619113 | CELSR2, PSRC1, SORT1 | 2193 | -0.01 | 0.04 | 8.5E-01 | 0.21 |
| apo E                                 | rs12740374 | 1  | 109619113 | CELSR2, PSRC1, SORT1 | 2262 | 0.03  | 0.04 | 4.0E-01 | 0.21 |
| remnant lipoprotein chol              | rs12740374 | 1  | 109619113 | CELSR2, PSRC1, SORT1 | 2470 | 0.01  | 0.04 | 8.5E-01 | 0.22 |
| remnant lipoprotein triglycerides     | rs12740374 | 1  | 109619113 | CELSR2, PSRC1, SORT1 | 2387 | 0.05  | 0.04 | 1.7E-01 | 0.22 |
| triglycerides exam 1                  | rs12740374 | 1  | 109619113 | CELSR2, PSRC1, SORT1 | 3494 | -0.03 | 0.03 | 3.4E-01 | 0.21 |
| triglycerides/hdl ratio exam 1        | rs12740374 | 1  | 109619113 | CELSR2, PSRC1, SORT1 | 3480 | -0.04 | 0.03 | 2.4E-01 | 0.22 |
| intermediate VLDL concentration - NMR | rs12740374 | 1  | 109619113 | CELSR2, PSRC1, SORT1 | 2897 | -0.01 | 0.03 | 8.6E-01 | 0.22 |
| large VLDL concentration - NMR        | rs12740374 | 1  | 109619113 | CELSR2, PSRC1, SORT1 | 2408 | 0.03  | 0.04 | 4.5E-01 | 0.22 |
| small VLDL concentration - NMR        | rs12740374 | 1  | 109619113 | CELSR2, PSRC1, SORT1 | 2744 | -0.11 | 0.03 | 1.5E-03 | 0.22 |
| VLDL size - NMR                       | rs12740374 | 1  | 109619113 | CELSR2, PSRC1, SORT1 | 2744 | 0.08  | 0.03 | 1.7E-02 | 0.22 |
| apo A-I                               | rs1501908  | 5  | 156330747 | TIMD4, TIMD1         | 3023 | -0.01 | 0.03 | 7.1E-01 | 0.37 |
| apo B                                 | rs1501908  | 5  | 156330747 | TIMD4, TIMD1         | 3023 | -0.01 | 0.03 | 7.1E-01 | 0.37 |
| apo C-III                             | rs1501908  | 5  | 156330747 | TIMD4, TIMD1         | 2486 | -0.02 | 0.03 | 5.3E-01 | 0.38 |
| total chol exam 1                     | rs1501908  | 5  | 156330747 | TIMD4, TIMD1         | 3496 | -0.01 | 0.02 | 5.9E-01 | 0.38 |
| total chol/hdl chol ratio exam 1      | rs1501908  | 5  | 156330747 | TIMD4, TIMD1         | 3481 | 0.00  | 0.02 | 9.2E-01 | 0.38 |
| hdl chol exam 1                       | rs1501908  | 5  | 156330747 | TIMD4, TIMD1         | 3495 | 0.00  | 0.02 | 9.5E-01 | 0.38 |
| hdl-2                                 | rs1501908  | 5  | 156330747 | TIMD4, TIMD1         | 3166 | 0.00  | 0.03 | 9.1E-01 | 0.37 |
| hdl-3                                 | rs1501908  | 5  | 156330747 | TIMD4, TIMD1         | 3009 | -0.01 | 0.03 | 8.2E-01 | 0.38 |
| intermediate HDL concentration - NMR  | rs1501908  | 5  | 156330747 | TIMD4, TIMD1         | 2744 | 0.02  | 0.03 | 4.7E-01 | 0.37 |
| large HDL concentration - NMR         | rs1501908  | 5  | 156330747 | TIMD4, TIMD1         | 2744 | -0.02 | 0.03 | 5.8E-01 | 0.37 |
| small HDL concentration - NMR         | rs1501908  | 5  | 156330747 | TIMD4, TIMD1         | 2744 | 0.01  | 0.03 | 7.2E-01 | 0.37 |
| HDL size - NMR                        | rs1501908  | 5  | 156330747 | TIMD4, TIMD1         | 2744 | -0.03 | 0.03 | 2.4E-01 | 0.37 |
| IDL concentration - NMR               | rs1501908  | 5  | 156330747 | TIMD4, TIMD1         | 2744 | 0.01  | 0.03 | 7.6E-01 | 0.37 |
| ldl chol exam 1                       | rs1501908  | 5  | 156330747 | TIMD4, TIMD1         | 3458 | -0.01 | 0.02 | 6.6E-01 | 0.38 |
| large LDL concentration - NMR         | rs1501908  | 5  | 156330747 | TIMD4, TIMD1         | 2744 | -0.01 | 0.03 | 6.6E-01 | 0.37 |
| small LDL concentration - NMR         | rs1501908  | 5  | 156330747 | TIMD4, TIMD1         | 2744 | 0.05  | 0.03 | 9.1E-02 | 0.37 |
| LDL size - NMR                        | rs1501908  | 5  | 156330747 | TIMD4, TIMD1         | 2744 | -0.04 | 0.03 | 2.1E-01 | 0.37 |
| lipoprotein (a)                       | rs1501908  | 5  | 156330747 | TIMD4, TIMD1         | 2193 | -0.01 | 0.03 | 7.1E-01 | 0.38 |
| apo E                                 | rs1501908  | 5  | 156330747 | TIMD4, TIMD1         | 2262 | -0.03 | 0.03 | 2.9E-01 | 0.37 |
| remnant lipoprotein chol              | rs1501908  | 5  | 156330747 | TIMD4, TIMD1         | 2470 | 0.03  | 0.03 | 2.5E-01 | 0.37 |
| remnant lipoprotein triglycerides     | rs1501908  | 5  | 156330747 | TIMD4, TIMD1         | 2387 | 0.01  | 0.03 | 7.5E-01 | 0.37 |
| triglycerides exam 1                  | rs1501908  | 5  | 156330747 | TIMD4, TIMD1         | 3494 | -0.03 | 0.02 | 1.7E-01 | 0.38 |
| triglycerides/hdl ratio exam 1        | rs1501908  | 5  | 156330747 | TIMD4, TIMD1         | 3480 | -0.03 | 0.02 | 3.0E-01 | 0.38 |
| intermediate VLDL concentration - NMR | rs1501908  | 5  | 156330747 | TIMD4, TIMD1         | 2897 | 0.00  | 0.03 | 8.7E-01 | 0.37 |
| large VLDL concentration - NMR        | rs1501908  | 5  | 156330747 | TIMD4, TIMD1         | 2408 | 0.00  | 0.03 | 9.1E-01 | 0.38 |
| small VLDL concentration - NMR        | rs1501908  | 5  | 156330747 | TIMD4, TIMD1         | 2744 | 0.01  | 0.03 | 8.5E-01 | 0.37 |
| VLDL size - NMR                       | rs1501908  | 5  | 156330747 | TIMD4, TIMD1         | 2744 | 0.01  | 0.03 | 7.2E-01 | 0.37 |
| apo A-I                               | rs17216525 | 19 | 19523220  | CSPG3, CILP2, PBX4   | 3023 | 0.03  | 0.05 | 5.0E-01 | 0.08 |
| apo B                                 | rs17216525 | 19 | 19523220  | CSPG3, CILP2, PBX4   | 3023 | 0.01  | 0.05 | 8.6E-01 | 0.08 |
| apo C-III                             | rs17216525 | 19 | 19523220  | CSPG3, CILP2, PBX4   | 2486 | -0.13 | 0.05 | 1.4E-02 | 0.08 |
| total chol exam 1                     | rs17216525 | 19 | 19523220  | CSPG3, CILP2, PBX4   | 3496 | -0.11 | 0.05 | 1.3E-02 | 0.08 |
| total chol/hdl chol ratio exam 1      | rs17216525 | 19 | 19523220  | CSPG3, CILP2, PBX4   | 3481 | -0.07 | 0.05 | 1.5E-01 | 0.08 |

|                                       |            |    |          |                    |      |       |      |         |      |
|---------------------------------------|------------|----|----------|--------------------|------|-------|------|---------|------|
| hdl chol exam 1                       | rs17216525 | 19 | 19523220 | CSPG3, CILP2, PBX4 | 3495 | 0.00  | 0.05 | 9.8E-01 | 0.08 |
| hdl-2                                 | rs17216525 | 19 | 19523220 | CSPG3, CILP2, PBX4 | 3166 | 0.08  | 0.05 | 9.3E-02 | 0.08 |
| hdl-3                                 | rs17216525 | 19 | 19523220 | CSPG3, CILP2, PBX4 | 3009 | 0.02  | 0.05 | 6.6E-01 | 0.08 |
| intermediate HDL concentration - NMR  | rs17216525 | 19 | 19523220 | CSPG3, CILP2, PBX4 | 2744 | 0.00  | 0.05 | 9.5E-01 | 0.08 |
| large HDL concentration - NMR         | rs17216525 | 19 | 19523220 | CSPG3, CILP2, PBX4 | 2744 | -0.03 | 0.05 | 6.2E-01 | 0.08 |
| small HDL concentration - NMR         | rs17216525 | 19 | 19523220 | CSPG3, CILP2, PBX4 | 2744 | 0.05  | 0.05 | 3.0E-01 | 0.08 |
| HDL size - NMR                        | rs17216525 | 19 | 19523220 | CSPG3, CILP2, PBX4 | 2744 | -0.02 | 0.05 | 7.3E-01 | 0.08 |
| IDL concentration - NMR               | rs17216525 | 19 | 19523220 | CSPG3, CILP2, PBX4 | 2744 | -0.04 | 0.05 | 3.9E-01 | 0.08 |
| ldl chol exam 1                       | rs17216525 | 19 | 19523220 | CSPG3, CILP2, PBX4 | 3458 | -0.09 | 0.05 | 5.9E-02 | 0.08 |
| large LDL concentration - NMR         | rs17216525 | 19 | 19523220 | CSPG3, CILP2, PBX4 | 2744 | 0.03  | 0.05 | 5.5E-01 | 0.08 |
| small LDL concentration - NMR         | rs17216525 | 19 | 19523220 | CSPG3, CILP2, PBX4 | 2744 | -0.01 | 0.05 | 8.7E-01 | 0.08 |
| LDL size - NMR                        | rs17216525 | 19 | 19523220 | CSPG3, CILP2, PBX4 | 2744 | 0.05  | 0.05 | 3.3E-01 | 0.08 |
| lipoprotein (a)                       | rs17216525 | 19 | 19523220 | CSPG3, CILP2, PBX4 | 2193 | 0.07  | 0.06 | 2.1E-01 | 0.08 |
| apo E                                 | rs17216525 | 19 | 19523220 | CSPG3, CILP2, PBX4 | 2262 | -0.07 | 0.06 | 2.1E-01 | 0.08 |
| remnant lipoprotein chol              | rs17216525 | 19 | 19523220 | CSPG3, CILP2, PBX4 | 2470 | -0.07 | 0.05 | 2.0E-01 | 0.08 |
| remnant lipoprotein triglycerides     | rs17216525 | 19 | 19523220 | CSPG3, CILP2, PBX4 | 2387 | -0.04 | 0.06 | 5.1E-01 | 0.08 |
| triglycerides exam 1                  | rs17216525 | 19 | 19523220 | CSPG3, CILP2, PBX4 | 3494 | -0.11 | 0.05 | 2.3E-02 | 0.08 |
| triglycerides/hdl ratio exam 1        | rs17216525 | 19 | 19523220 | CSPG3, CILP2, PBX4 | 3480 | -0.08 | 0.05 | 7.1E-02 | 0.08 |
| intermediate VLDL concentration - NMR | rs17216525 | 19 | 19523220 | CSPG3, CILP2, PBX4 | 2897 | -0.13 | 0.05 | 1.0E-02 | 0.08 |
| large VLDL concentration - NMR        | rs17216525 | 19 | 19523220 | CSPG3, CILP2, PBX4 | 2408 | -0.06 | 0.06 | 2.9E-01 | 0.08 |
| small VLDL concentration - NMR        | rs17216525 | 19 | 19523220 | CSPG3, CILP2, PBX4 | 2744 | -0.02 | 0.05 | 7.1E-01 | 0.08 |
| VLDL size - NMR                       | rs17216525 | 19 | 19523220 | CSPG3, CILP2, PBX4 | 2744 | -0.04 | 0.05 | 4.3E-01 | 0.08 |
| apo A-I                               | rs173539   | 16 | 55545545 | CETP               | 3023 | 0.19  | 0.03 | 1.3E-10 | 0.32 |
| apo B                                 | rs173539   | 16 | 55545545 | CETP               | 3023 | -0.03 | 0.03 | 3.6E-01 | 0.32 |
| apo C-III                             | rs173539   | 16 | 55545545 | CETP               | 2486 | 0.04  | 0.03 | 1.6E-01 | 0.32 |
| total chol exam 1                     | rs173539   | 16 | 55545545 | CETP               | 3496 | 0.05  | 0.03 | 5.8E-02 | 0.31 |
| total chol/hdl chol ratio exam 1      | rs173539   | 16 | 55545545 | CETP               | 3481 | -0.21 | 0.03 | 5.6E-15 | 0.31 |
| hdl chol exam 1                       | rs173539   | 16 | 55545545 | CETP               | 3495 | 0.29  | 0.03 | 1.5E-26 | 0.31 |
| hdl-2                                 | rs173539   | 16 | 55545545 | CETP               | 3166 | 0.18  | 0.03 | 6.5E-10 | 0.31 |
| hdl-3                                 | rs173539   | 16 | 55545545 | CETP               | 3009 | 0.24  | 0.03 | 2.2E-16 | 0.31 |
| intermediate HDL concentration - NMR  | rs173539   | 16 | 55545545 | CETP               | 2744 | 0.00  | 0.03 | 9.5E-01 | 0.32 |
| large HDL concentration - NMR         | rs173539   | 16 | 55545545 | CETP               | 2744 | 0.23  | 0.03 | 1.6E-13 | 0.32 |
| small HDL concentration - NMR         | rs173539   | 16 | 55545545 | CETP               | 2744 | -0.02 | 0.03 | 5.1E-01 | 0.32 |
| HDL size - NMR                        | rs173539   | 16 | 55545545 | CETP               | 2744 | 0.19  | 0.03 | 3.1E-10 | 0.32 |
| IDL concentration - NMR               | rs173539   | 16 | 55545545 | CETP               | 2744 | -0.15 | 0.03 | 1.1E-06 | 0.32 |
| ldl chol exam 1                       | rs173539   | 16 | 55545545 | CETP               | 3458 | -0.03 | 0.03 | 2.2E-01 | 0.31 |
| large LDL concentration - NMR         | rs173539   | 16 | 55545545 | CETP               | 2744 | 0.14  | 0.03 | 7.4E-06 | 0.32 |
| small LDL concentration - NMR         | rs173539   | 16 | 55545545 | CETP               | 2744 | -0.16 | 0.03 | 5.3E-07 | 0.32 |
| LDL size - NMR                        | rs173539   | 16 | 55545545 | CETP               | 2744 | 0.17  | 0.03 | 3.6E-08 | 0.32 |
| lipoprotein (a)                       | rs173539   | 16 | 55545545 | CETP               | 2193 | -0.06 | 0.03 | 7.2E-02 | 0.31 |
| apo E                                 | rs173539   | 16 | 55545545 | CETP               | 2262 | 0.02  | 0.03 | 5.7E-01 | 0.32 |
| remnant lipoprotein chol              | rs173539   | 16 | 55545545 | CETP               | 2470 | 0.00  | 0.03 | 9.8E-01 | 0.32 |



|                                       |           |    |          |                     |      |       |      |         |      |
|---------------------------------------|-----------|----|----------|---------------------|------|-------|------|---------|------|
| remnant lipoprotein triglycerides     | rs173539  | 16 | 55545545 | CETP                | 2387 | -0.01 | 0.03 | 7.7E-01 | 0.32 |
| triglycerides exam 1                  | rs173539  | 16 | 55545545 | CETP                | 3494 | -0.07 | 0.03 | 1.8E-02 | 0.31 |
| triglycerides/hdl ratio exam 1        | rs173539  | 16 | 55545545 | CETP                | 3480 | -0.15 | 0.03 | 4.8E-08 | 0.31 |
| intermediate VLDL concentration - NMR | rs173539  | 16 | 55545545 | CETP                | 2897 | 0.00  | 0.03 | 9.7E-01 | 0.31 |
| large VLDL concentration - NMR        | rs173539  | 16 | 55545545 | CETP                | 2408 | 0.07  | 0.03 | 2.9E-02 | 0.31 |
| small VLDL concentration - NMR        | rs173539  | 16 | 55545545 | CETP                | 2744 | 0.00  | 0.03 | 9.0E-01 | 0.32 |
| VLDL size - NMR                       | rs173539  | 16 | 55545545 | CETP                | 2744 | 0.02  | 0.03 | 4.3E-01 | 0.32 |
| apo A-I                               | rs174547  | 11 | 61327359 | FADS1, FADS2, FADS3 | 3023 | -0.03 | 0.03 | 2.9E-01 | 0.33 |
| apo B                                 | rs174547  | 11 | 61327359 | FADS1, FADS2, FADS3 | 3023 | -0.03 | 0.03 | 2.3E-01 | 0.33 |
| apo C-III                             | rs174547  | 11 | 61327359 | FADS1, FADS2, FADS3 | 2486 | 0.01  | 0.03 | 6.6E-01 | 0.33 |
| total chol exam 1                     | rs174547  | 11 | 61327359 | FADS1, FADS2, FADS3 | 3496 | -0.06 | 0.03 | 2.3E-02 | 0.33 |
| total chol/hdl chol ratio exam 1      | rs174547  | 11 | 61327359 | FADS1, FADS2, FADS3 | 3481 | 0.03  | 0.03 | 2.9E-01 | 0.33 |
| hdl chol exam 1                       | rs174547  | 11 | 61327359 | FADS1, FADS2, FADS3 | 3495 | -0.07 | 0.03 | 4.7E-03 | 0.33 |
| hdl-2                                 | rs174547  | 11 | 61327359 | FADS1, FADS2, FADS3 | 3166 | -0.08 | 0.03 | 2.8E-03 | 0.33 |
| hdl-3                                 | rs174547  | 11 | 61327359 | FADS1, FADS2, FADS3 | 3009 | -0.05 | 0.03 | 9.5E-02 | 0.33 |
| intermediate HDL concentration - NMR  | rs174547  | 11 | 61327359 | FADS1, FADS2, FADS3 | 2744 | 0.08  | 0.03 | 4.1E-03 | 0.33 |
| large HDL concentration - NMR         | rs174547  | 11 | 61327359 | FADS1, FADS2, FADS3 | 2744 | -0.08 | 0.03 | 5.5E-03 | 0.33 |
| small HDL concentration - NMR         | rs174547  | 11 | 61327359 | FADS1, FADS2, FADS3 | 2744 | 0.00  | 0.03 | 8.8E-01 | 0.33 |
| HDL size - NMR                        | rs174547  | 11 | 61327359 | FADS1, FADS2, FADS3 | 2744 | -0.07 | 0.03 | 1.7E-02 | 0.33 |
| IDL concentration - NMR               | rs174547  | 11 | 61327359 | FADS1, FADS2, FADS3 | 2744 | 0.05  | 0.03 | 1.1E-01 | 0.33 |
| ldl chol exam 1                       | rs174547  | 11 | 61327359 | FADS1, FADS2, FADS3 | 3458 | -0.05 | 0.03 | 7.7E-02 | 0.33 |
| large LDL concentration - NMR         | rs174547  | 11 | 61327359 | FADS1, FADS2, FADS3 | 2744 | -0.05 | 0.03 | 7.9E-02 | 0.33 |
| small LDL concentration - NMR         | rs174547  | 11 | 61327359 | FADS1, FADS2, FADS3 | 2744 | -0.04 | 0.03 | 2.1E-01 | 0.33 |
| LDL size - NMR                        | rs174547  | 11 | 61327359 | FADS1, FADS2, FADS3 | 2744 | -0.02 | 0.03 | 6.0E-01 | 0.33 |
| lipoprotein (a)                       | rs174547  | 11 | 61327359 | FADS1, FADS2, FADS3 | 2193 | 0.00  | 0.03 | 9.6E-01 | 0.33 |
| apo E                                 | rs174547  | 11 | 61327359 | FADS1, FADS2, FADS3 | 2262 | -0.05 | 0.03 | 1.5E-01 | 0.33 |
| remnant lipoprotein chol              | rs174547  | 11 | 61327359 | FADS1, FADS2, FADS3 | 2470 | 0.09  | 0.03 | 5.8E-03 | 0.33 |
| remnant lipoprotein triglycerides     | rs174547  | 11 | 61327359 | FADS1, FADS2, FADS3 | 2387 | 0.09  | 0.03 | 5.4E-03 | 0.33 |
| triglycerides exam 1                  | rs174547  | 11 | 61327359 | FADS1, FADS2, FADS3 | 3494 | 0.05  | 0.03 | 6.3E-02 | 0.33 |
| triglycerides/hdl ratio exam 1        | rs174547  | 11 | 61327359 | FADS1, FADS2, FADS3 | 3480 | 0.06  | 0.03 | 1.5E-02 | 0.33 |
| intermediate VLDL concentration - NMR | rs174547  | 11 | 61327359 | FADS1, FADS2, FADS3 | 2897 | 0.09  | 0.03 | 1.6E-03 | 0.33 |
| large VLDL concentration - NMR        | rs174547  | 11 | 61327359 | FADS1, FADS2, FADS3 | 2408 | 0.10  | 0.03 | 1.7E-03 | 0.33 |
| small VLDL concentration - NMR        | rs174547  | 11 | 61327359 | FADS1, FADS2, FADS3 | 2744 | -0.02 | 0.03 | 4.3E-01 | 0.33 |
| VLDL size - NMR                       | rs174547  | 11 | 61327359 | FADS1, FADS2, FADS3 | 2744 | 0.11  | 0.03 | 2.9E-04 | 0.33 |
| apo A-I                               | rs1800961 | 20 | 42475778 | HNF4A               | 3023 | -0.06 | 0.14 | 6.7E-01 | 0.05 |
| apo B                                 | rs1800961 | 20 | 42475778 | HNF4A               | 3023 | -0.08 | 0.14 | 5.6E-01 | 0.05 |
| apo C-III                             | rs1800961 | 20 | 42475778 | HNF4A               | 2486 | 0.01  | 0.14 | 9.4E-01 | 0.05 |
| total chol exam 1                     | rs1800961 | 20 | 42475778 | HNF4A               | 3496 | 0.09  | 0.12 | 4.5E-01 | 0.05 |
| total chol/hdl chol ratio exam 1      | rs1800961 | 20 | 42475778 | HNF4A               | 3481 | 0.06  | 0.12 | 6.5E-01 | 0.05 |
| hdl chol exam 1                       | rs1800961 | 20 | 42475778 | HNF4A               | 3495 | 0.00  | 0.12 | 9.8E-01 | 0.05 |
| hdl-2                                 | rs1800961 | 20 | 42475778 | HNF4A               | 3166 | 0.11  | 0.13 | 4.1E-01 | 0.05 |
| hdl-3                                 | rs1800961 | 20 | 42475778 | HNF4A               | 3009 | -0.02 | 0.14 | 8.8E-01 | 0.05 |

|                                       |           |    |           |       |      |       |      |         |      |
|---------------------------------------|-----------|----|-----------|-------|------|-------|------|---------|------|
| intermediate HDL concentration - NMR  | rs1800961 | 20 | 42475778  | HNF4A | 2744 | 0.04  | 0.14 | 7.6E-01 | 0.05 |
| large HDL concentration - NMR         | rs1800961 | 20 | 42475778  | HNF4A | 2744 | 0.03  | 0.14 | 8.3E-01 | 0.05 |
| small HDL concentration - NMR         | rs1800961 | 20 | 42475778  | HNF4A | 2744 | -0.08 | 0.14 | 5.6E-01 | 0.05 |
| HDL size - NMR                        | rs1800961 | 20 | 42475778  | HNF4A | 2744 | 0.07  | 0.14 | 6.4E-01 | 0.05 |
| IDL concentration - NMR               | rs1800961 | 20 | 42475778  | HNF4A | 2744 | 0.08  | 0.14 | 5.8E-01 | 0.05 |
| ldl chol exam 1                       | rs1800961 | 20 | 42475778  | HNF4A | 3458 | 0.02  | 0.12 | 9.0E-01 | 0.05 |
| large LDL concentration - NMR         | rs1800961 | 20 | 42475778  | HNF4A | 2744 | -0.17 | 0.14 | 2.5E-01 | 0.05 |
| small LDL concentration - NMR         | rs1800961 | 20 | 42475778  | HNF4A | 2744 | 0.10  | 0.14 | 4.7E-01 | 0.05 |
| LDL size - NMR                        | rs1800961 | 20 | 42475778  | HNF4A | 2744 | -0.04 | 0.14 | 7.8E-01 | 0.05 |
| lipoprotein (a)                       | rs1800961 | 20 | 42475778  | HNF4A | 2193 | -0.16 | 0.15 | 3.0E-01 | 0.05 |
| apo E                                 | rs1800961 | 20 | 42475778  | HNF4A | 2262 | 0.02  | 0.15 | 8.9E-01 | 0.05 |
| remnant lipoprotein chol              | rs1800961 | 20 | 42475778  | HNF4A | 2470 | -0.01 | 0.15 | 9.2E-01 | 0.05 |
| remnant lipoprotein triglycerides     | rs1800961 | 20 | 42475778  | HNF4A | 2387 | -0.01 | 0.15 | 9.4E-01 | 0.05 |
| triglycerides exam 1                  | rs1800961 | 20 | 42475778  | HNF4A | 3494 | 0.08  | 0.12 | 5.3E-01 | 0.05 |
| triglycerides/hdl ratio exam 1        | rs1800961 | 20 | 42475778  | HNF4A | 3480 | 0.07  | 0.12 | 5.7E-01 | 0.05 |
| intermediate VLDL concentration - NMR | rs1800961 | 20 | 42475778  | HNF4A | 2897 | -0.05 | 0.14 | 7.4E-01 | 0.05 |
| large VLDL concentration - NMR        | rs1800961 | 20 | 42475778  | HNF4A | 2408 | -0.22 | 0.15 | 1.5E-01 | 0.05 |
| small VLDL concentration - NMR        | rs1800961 | 20 | 42475778  | HNF4A | 2744 | 0.21  | 0.14 | 1.4E-01 | 0.05 |
| VLDL size - NMR                       | rs1800961 | 20 | 42475778  | HNF4A | 2744 | -0.13 | 0.14 | 3.5E-01 | 0.05 |
| apo A-I                               | rs1883025 | 9  | 106704122 | ABCA1 | 3023 | -0.08 | 0.03 | 7.1E-03 | 0.26 |
| apo B                                 | rs1883025 | 9  | 106704122 | ABCA1 | 3023 | -0.02 | 0.03 | 5.1E-01 | 0.26 |
| apo C-III                             | rs1883025 | 9  | 106704122 | ABCA1 | 2486 | -0.05 | 0.03 | 1.7E-01 | 0.26 |
| total chol exam 1                     | rs1883025 | 9  | 106704122 | ABCA1 | 3496 | -0.07 | 0.03 | 1.9E-02 | 0.26 |
| total chol/hdl chol ratio exam 1      | rs1883025 | 9  | 106704122 | ABCA1 | 3481 | 0.01  | 0.03 | 7.0E-01 | 0.26 |
| hdl chol exam 1                       | rs1883025 | 9  | 106704122 | ABCA1 | 3495 | -0.07 | 0.03 | 1.2E-02 | 0.26 |
| hdl-2                                 | rs1883025 | 9  | 106704122 | ABCA1 | 3166 | -0.07 | 0.03 | 2.6E-02 | 0.26 |
| hdl-3                                 | rs1883025 | 9  | 106704122 | ABCA1 | 3009 | -0.08 | 0.03 | 7.6E-03 | 0.26 |
| intermediate HDL concentration - NMR  | rs1883025 | 9  | 106704122 | ABCA1 | 2744 | 0.06  | 0.03 | 8.1E-02 | 0.26 |
| large HDL concentration - NMR         | rs1883025 | 9  | 106704122 | ABCA1 | 2744 | -0.09 | 0.03 | 8.9E-03 | 0.26 |
| small HDL concentration - NMR         | rs1883025 | 9  | 106704122 | ABCA1 | 2744 | -0.08 | 0.03 | 1.5E-02 | 0.26 |
| HDL size - NMR                        | rs1883025 | 9  | 106704122 | ABCA1 | 2744 | -0.08 | 0.03 | 1.7E-02 | 0.26 |
| IDL concentration - NMR               | rs1883025 | 9  | 106704122 | ABCA1 | 2744 | -0.02 | 0.03 | 6.0E-01 | 0.26 |
| ldl chol exam 1                       | rs1883025 | 9  | 106704122 | ABCA1 | 3458 | -0.04 | 0.03 | 1.3E-01 | 0.26 |
| large LDL concentration - NMR         | rs1883025 | 9  | 106704122 | ABCA1 | 2744 | -0.01 | 0.03 | 6.6E-01 | 0.26 |
| small LDL concentration - NMR         | rs1883025 | 9  | 106704122 | ABCA1 | 2744 | 0.03  | 0.03 | 3.0E-01 | 0.26 |
| LDL size - NMR                        | rs1883025 | 9  | 106704122 | ABCA1 | 2744 | -0.02 | 0.03 | 6.0E-01 | 0.26 |
| lipoprotein (a)                       | rs1883025 | 9  | 106704122 | ABCA1 | 2193 | -0.04 | 0.04 | 2.4E-01 | 0.26 |
| apo E                                 | rs1883025 | 9  | 106704122 | ABCA1 | 2262 | 0.02  | 0.04 | 6.2E-01 | 0.26 |
| remnant lipoprotein chol              | rs1883025 | 9  | 106704122 | ABCA1 | 2470 | 0.00  | 0.03 | 8.9E-01 | 0.25 |
| remnant lipoprotein triglycerides     | rs1883025 | 9  | 106704122 | ABCA1 | 2387 | 0.03  | 0.03 | 3.3E-01 | 0.26 |
| triglycerides exam 1                  | rs1883025 | 9  | 106704122 | ABCA1 | 3494 | -0.02 | 0.03 | 4.0E-01 | 0.26 |
| triglycerides/hdl ratio exam 1        | rs1883025 | 9  | 106704122 | ABCA1 | 3480 | 0.00  | 0.03 | 9.6E-01 | 0.26 |

|                                       |           |    |           |           |      |       |      |         |      |
|---------------------------------------|-----------|----|-----------|-----------|------|-------|------|---------|------|
| intermediate VLDL concentration - NMR | rs1883025 | 9  | 106704122 | ABCA1     | 2897 | -0.03 | 0.03 | 3.0E-01 | 0.26 |
| large VLDL concentration - NMR        | rs1883025 | 9  | 106704122 | ABCA1     | 2408 | 0.01  | 0.04 | 8.5E-01 | 0.26 |
| small VLDL concentration - NMR        | rs1883025 | 9  | 106704122 | ABCA1     | 2744 | -0.05 | 0.03 | 1.2E-01 | 0.26 |
| VLDL size - NMR                       | rs1883025 | 9  | 106704122 | ABCA1     | 2744 | 0.03  | 0.03 | 3.5E-01 | 0.26 |
| apo A-I                               | rs2271293 | 16 | 66459571  | LCAT      | 3023 | 0.08  | 0.04 | 6.5E-02 | 0.10 |
| apo B                                 | rs2271293 | 16 | 66459571  | LCAT      | 3023 | -0.05 | 0.04 | 2.3E-01 | 0.10 |
| apo C-III                             | rs2271293 | 16 | 66459571  | LCAT      | 2486 | -0.01 | 0.05 | 8.5E-01 | 0.10 |
| total chol exam 1                     | rs2271293 | 16 | 66459571  | LCAT      | 3496 | 0.07  | 0.04 | 6.8E-02 | 0.10 |
| total chol/hdl chol ratio exam 1      | rs2271293 | 16 | 66459571  | LCAT      | 3481 | -0.05 | 0.04 | 2.0E-01 | 0.10 |
| hdl chol exam 1                       | rs2271293 | 16 | 66459571  | LCAT      | 3495 | 0.10  | 0.04 | 1.2E-02 | 0.10 |
| hdl-2                                 | rs2271293 | 16 | 66459571  | LCAT      | 3166 | 0.10  | 0.04 | 2.0E-02 | 0.10 |
| hdl-3                                 | rs2271293 | 16 | 66459571  | LCAT      | 3009 | 0.11  | 0.04 | 8.8E-03 | 0.10 |
| intermediate HDL concentration - NMR  | rs2271293 | 16 | 66459571  | LCAT      | 2744 | -0.06 | 0.04 | 2.2E-01 | 0.10 |
| large HDL concentration - NMR         | rs2271293 | 16 | 66459571  | LCAT      | 2744 | 0.13  | 0.05 | 2.9E-03 | 0.10 |
| small HDL concentration - NMR         | rs2271293 | 16 | 66459571  | LCAT      | 2744 | -0.02 | 0.04 | 6.5E-01 | 0.10 |
| HDL size - NMR                        | rs2271293 | 16 | 66459571  | LCAT      | 2744 | 0.13  | 0.04 | 4.9E-03 | 0.10 |
| IDL concentration - NMR               | rs2271293 | 16 | 66459571  | LCAT      | 2744 | 0.00  | 0.04 | 9.7E-01 | 0.10 |
| ldl chol exam 1                       | rs2271293 | 16 | 66459571  | LCAT      | 3458 | 0.04  | 0.04 | 2.6E-01 | 0.10 |
| large LDL concentration - NMR         | rs2271293 | 16 | 66459571  | LCAT      | 2744 | 0.13  | 0.05 | 5.7E-03 | 0.10 |
| small LDL concentration - NMR         | rs2271293 | 16 | 66459571  | LCAT      | 2744 | -0.13 | 0.05 | 4.8E-03 | 0.10 |
| LDL size - NMR                        | rs2271293 | 16 | 66459571  | LCAT      | 2744 | 0.17  | 0.05 | 1.5E-04 | 0.10 |
| lipoprotein (a)                       | rs2271293 | 16 | 66459571  | LCAT      | 2193 | 0.04  | 0.05 | 4.6E-01 | 0.11 |
| apo E                                 | rs2271293 | 16 | 66459571  | LCAT      | 2262 | -0.04 | 0.05 | 4.4E-01 | 0.10 |
| remnant lipoprotein chol              | rs2271293 | 16 | 66459571  | LCAT      | 2470 | -0.10 | 0.05 | 3.5E-02 | 0.10 |
| remnant lipoprotein triglycerides     | rs2271293 | 16 | 66459571  | LCAT      | 2387 | -0.09 | 0.05 | 6.6E-02 | 0.10 |
| triglycerides exam 1                  | rs2271293 | 16 | 66459571  | LCAT      | 3494 | -0.05 | 0.04 | 2.2E-01 | 0.10 |
| triglycerides/hdl ratio exam 1        | rs2271293 | 16 | 66459571  | LCAT      | 3480 | -0.07 | 0.04 | 5.6E-02 | 0.10 |
| intermediate VLDL concentration - NMR | rs2271293 | 16 | 66459571  | LCAT      | 2897 | -0.07 | 0.04 | 1.2E-01 | 0.10 |
| large VLDL concentration - NMR        | rs2271293 | 16 | 66459571  | LCAT      | 2408 | -0.07 | 0.05 | 1.7E-01 | 0.10 |
| small VLDL concentration - NMR        | rs2271293 | 16 | 66459571  | LCAT      | 2744 | -0.01 | 0.04 | 8.5E-01 | 0.10 |
| VLDL size - NMR                       | rs2271293 | 16 | 66459571  | LCAT      | 2744 | -0.06 | 0.04 | 2.1E-01 | 0.10 |
| apo A-I                               | rs2338104 | 12 | 108379551 | MMAB, MVK | 3023 | 0.04  | 0.03 | 9.5E-02 | 0.55 |
| apo B                                 | rs2338104 | 12 | 108379551 | MMAB, MVK | 3023 | -0.03 | 0.03 | 3.1E-01 | 0.55 |
| apo C-III                             | rs2338104 | 12 | 108379551 | MMAB, MVK | 2486 | 0.03  | 0.03 | 2.9E-01 | 0.54 |
| total chol exam 1                     | rs2338104 | 12 | 108379551 | MMAB, MVK | 3496 | 0.06  | 0.02 | 1.7E-02 | 0.55 |
| total chol/hdl chol ratio exam 1      | rs2338104 | 12 | 108379551 | MMAB, MVK | 3481 | -0.02 | 0.02 | 4.2E-01 | 0.55 |
| hdl chol exam 1                       | rs2338104 | 12 | 108379551 | MMAB, MVK | 3495 | 0.06  | 0.02 | 1.3E-02 | 0.55 |
| hdl-2                                 | rs2338104 | 12 | 108379551 | MMAB, MVK | 3166 | 0.05  | 0.03 | 5.1E-02 | 0.55 |
| hdl-3                                 | rs2338104 | 12 | 108379551 | MMAB, MVK | 3009 | 0.08  | 0.03 | 3.6E-03 | 0.55 |
| intermediate HDL concentration - NMR  | rs2338104 | 12 | 108379551 | MMAB, MVK | 2744 | -0.02 | 0.03 | 4.2E-01 | 0.55 |
| large HDL concentration - NMR         | rs2338104 | 12 | 108379551 | MMAB, MVK | 2744 | 0.07  | 0.03 | 1.0E-02 | 0.55 |
| small HDL concentration - NMR         | rs2338104 | 12 | 108379551 | MMAB, MVK | 2744 | 0.00  | 0.03 | 8.9E-01 | 0.55 |

|                                       |           |    |           |           |      |       |      |         |      |
|---------------------------------------|-----------|----|-----------|-----------|------|-------|------|---------|------|
| HDL size - NMR                        | rs2338104 | 12 | 108379551 | MMAB, MVK | 2744 | 0.06  | 0.03 | 3.7E-02 | 0.55 |
| IDL concentration - NMR               | rs2338104 | 12 | 108379551 | MMAB, MVK | 2744 | 0.05  | 0.03 | 9.1E-02 | 0.55 |
| ldl chol exam 1                       | rs2338104 | 12 | 108379551 | MMAB, MVK | 3458 | 0.02  | 0.02 | 3.3E-01 | 0.55 |
| large LDL concentration - NMR         | rs2338104 | 12 | 108379551 | MMAB, MVK | 2744 | -0.03 | 0.03 | 2.9E-01 | 0.55 |
| small LDL concentration - NMR         | rs2338104 | 12 | 108379551 | MMAB, MVK | 2744 | 0.02  | 0.03 | 5.8E-01 | 0.55 |
| LDL size - NMR                        | rs2338104 | 12 | 108379551 | MMAB, MVK | 2744 | -0.01 | 0.03 | 8.4E-01 | 0.55 |
| lipoprotein (a)                       | rs2338104 | 12 | 108379551 | MMAB, MVK | 2193 | 0.01  | 0.03 | 6.9E-01 | 0.55 |
| apo E                                 | rs2338104 | 12 | 108379551 | MMAB, MVK | 2262 | 0.01  | 0.03 | 6.3E-01 | 0.56 |
| remnant lipoprotein chol              | rs2338104 | 12 | 108379551 | MMAB, MVK | 2470 | 0.02  | 0.03 | 4.9E-01 | 0.55 |
| remnant lipoprotein triglycerides     | rs2338104 | 12 | 108379551 | MMAB, MVK | 2387 | -0.01 | 0.03 | 6.9E-01 | 0.55 |
| triglycerides exam 1                  | rs2338104 | 12 | 108379551 | MMAB, MVK | 3494 | 0.03  | 0.02 | 2.2E-01 | 0.55 |
| triglycerides/hdl ratio exam 1        | rs2338104 | 12 | 108379551 | MMAB, MVK | 3480 | 0.00  | 0.02 | 8.5E-01 | 0.55 |
| intermediate VLDL concentration - NMR | rs2338104 | 12 | 108379551 | MMAB, MVK | 2897 | 0.00  | 0.03 | 9.9E-01 | 0.55 |
| large VLDL concentration - NMR        | rs2338104 | 12 | 108379551 | MMAB, MVK | 2408 | 0.00  | 0.03 | 8.7E-01 | 0.55 |
| small VLDL concentration - NMR        | rs2338104 | 12 | 108379551 | MMAB, MVK | 2744 | -0.04 | 0.03 | 1.4E-01 | 0.55 |
| VLDL size - NMR                       | rs2338104 | 12 | 108379551 | MMAB, MVK | 2744 | 0.00  | 0.03 | 8.8E-01 | 0.55 |
| apo A-I                               | rs2650000 | 12 | 119873345 | TCF1      | 3023 | 0.03  | 0.03 | 3.1E-01 | 0.36 |
| apo B                                 | rs2650000 | 12 | 119873345 | TCF1      | 3023 | 0.06  | 0.03 | 2.9E-02 | 0.36 |
| apo C-III                             | rs2650000 | 12 | 119873345 | TCF1      | 2486 | 0.05  | 0.03 | 7.9E-02 | 0.36 |
| total chol exam 1                     | rs2650000 | 12 | 119873345 | TCF1      | 3496 | 0.08  | 0.02 | 1.5E-03 | 0.36 |
| total chol/hdl chol ratio exam 1      | rs2650000 | 12 | 119873345 | TCF1      | 3481 | 0.03  | 0.03 | 2.2E-01 | 0.36 |
| hdl chol exam 1                       | rs2650000 | 12 | 119873345 | TCF1      | 3495 | 0.01  | 0.03 | 6.4E-01 | 0.36 |
| hdl-2                                 | rs2650000 | 12 | 119873345 | TCF1      | 3166 | 0.01  | 0.03 | 6.8E-01 | 0.36 |
| hdl-3                                 | rs2650000 | 12 | 119873345 | TCF1      | 3009 | 0.00  | 0.03 | 9.8E-01 | 0.36 |
| intermediate HDL concentration - NMR  | rs2650000 | 12 | 119873345 | TCF1      | 2744 | 0.03  | 0.03 | 2.7E-01 | 0.36 |
| large HDL concentration - NMR         | rs2650000 | 12 | 119873345 | TCF1      | 2744 | 0.04  | 0.03 | 1.3E-01 | 0.36 |
| small HDL concentration - NMR         | rs2650000 | 12 | 119873345 | TCF1      | 2744 | -0.05 | 0.03 | 5.9E-02 | 0.36 |
| HDL size - NMR                        | rs2650000 | 12 | 119873345 | TCF1      | 2744 | 0.04  | 0.03 | 1.2E-01 | 0.36 |
| IDL concentration - NMR               | rs2650000 | 12 | 119873345 | TCF1      | 2744 | -0.01 | 0.03 | 7.2E-01 | 0.36 |
| ldl chol exam 1                       | rs2650000 | 12 | 119873345 | TCF1      | 3458 | 0.06  | 0.03 | 1.2E-02 | 0.36 |
| large LDL concentration - NMR         | rs2650000 | 12 | 119873345 | TCF1      | 2744 | 0.09  | 0.03 | 2.6E-03 | 0.36 |
| small LDL concentration - NMR         | rs2650000 | 12 | 119873345 | TCF1      | 2744 | -0.01 | 0.03 | 7.9E-01 | 0.36 |
| LDL size - NMR                        | rs2650000 | 12 | 119873345 | TCF1      | 2744 | 0.06  | 0.03 | 3.0E-02 | 0.36 |
| lipoprotein (a)                       | rs2650000 | 12 | 119873345 | TCF1      | 2193 | 0.01  | 0.03 | 7.2E-01 | 0.36 |
| apo E                                 | rs2650000 | 12 | 119873345 | TCF1      | 2262 | -0.04 | 0.03 | 1.6E-01 | 0.35 |
| remnant lipoprotein chol              | rs2650000 | 12 | 119873345 | TCF1      | 2470 | 0.00  | 0.03 | 9.9E-01 | 0.36 |
| remnant lipoprotein triglycerides     | rs2650000 | 12 | 119873345 | TCF1      | 2387 | 0.00  | 0.03 | 9.1E-01 | 0.36 |
| triglycerides exam 1                  | rs2650000 | 12 | 119873345 | TCF1      | 3494 | 0.04  | 0.03 | 8.4E-02 | 0.36 |
| triglycerides/hdl ratio exam 1        | rs2650000 | 12 | 119873345 | TCF1      | 3480 | 0.03  | 0.03 | 2.0E-01 | 0.36 |
| intermediate VLDL concentration - NMR | rs2650000 | 12 | 119873345 | TCF1      | 2897 | 0.02  | 0.03 | 4.2E-01 | 0.36 |
| large VLDL concentration - NMR        | rs2650000 | 12 | 119873345 | TCF1      | 2408 | -0.01 | 0.03 | 7.1E-01 | 0.36 |
| small VLDL concentration - NMR        | rs2650000 | 12 | 119873345 | TCF1      | 2744 | 0.08  | 0.03 | 5.1E-03 | 0.36 |

|                                       |           |    |           |         |      |       |      |         |      |
|---------------------------------------|-----------|----|-----------|---------|------|-------|------|---------|------|
| VLDL size - NMR                       | rs2650000 | 12 | 119873345 | TCF1    | 2744 | -0.04 | 0.03 | 1.6E-01 | 0.36 |
| apo A-I                               | rs2954029 | 8  | 126560154 | TRIB1   | 3023 | 0.02  | 0.03 | 3.7E-01 | 0.45 |
| apo B                                 | rs2954029 | 8  | 126560154 | TRIB1   | 3023 | -0.09 | 0.03 | 9.7E-04 | 0.45 |
| apo C-III                             | rs2954029 | 8  | 126560154 | TRIB1   | 2486 | -0.10 | 0.03 | 5.8E-04 | 0.45 |
| total chol exam 1                     | rs2954029 | 8  | 126560154 | TRIB1   | 3496 | -0.06 | 0.02 | 1.5E-02 | 0.44 |
| total chol/hdl chol ratio exam 1      | rs2954029 | 8  | 126560154 | TRIB1   | 3481 | -0.07 | 0.02 | 7.4E-03 | 0.44 |
| hdl chol exam 1                       | rs2954029 | 8  | 126560154 | TRIB1   | 3495 | 0.03  | 0.02 | 2.0E-01 | 0.44 |
| hdl-2                                 | rs2954029 | 8  | 126560154 | TRIB1   | 3166 | 0.04  | 0.03 | 1.5E-01 | 0.45 |
| hdl-3                                 | rs2954029 | 8  | 126560154 | TRIB1   | 3009 | 0.04  | 0.03 | 1.6E-01 | 0.45 |
| intermediate HDL concentration - NMR  | rs2954029 | 8  | 126560154 | TRIB1   | 2744 | 0.02  | 0.03 | 4.2E-01 | 0.45 |
| large HDL concentration - NMR         | rs2954029 | 8  | 126560154 | TRIB1   | 2744 | 0.05  | 0.03 | 5.3E-02 | 0.45 |
| small HDL concentration - NMR         | rs2954029 | 8  | 126560154 | TRIB1   | 2744 | -0.06 | 0.03 | 2.1E-02 | 0.45 |
| HDL size - NMR                        | rs2954029 | 8  | 126560154 | TRIB1   | 2744 | 0.05  | 0.03 | 6.2E-02 | 0.45 |
| IDL concentration - NMR               | rs2954029 | 8  | 126560154 | TRIB1   | 2744 | -0.05 | 0.03 | 5.0E-02 | 0.45 |
| ldl chol exam 1                       | rs2954029 | 8  | 126560154 | TRIB1   | 3458 | -0.06 | 0.02 | 1.2E-02 | 0.44 |
| large LDL concentration - NMR         | rs2954029 | 8  | 126560154 | TRIB1   | 2744 | 0.01  | 0.03 | 6.0E-01 | 0.45 |
| small LDL concentration - NMR         | rs2954029 | 8  | 126560154 | TRIB1   | 2744 | -0.09 | 0.03 | 1.1E-03 | 0.45 |
| LDL size - NMR                        | rs2954029 | 8  | 126560154 | TRIB1   | 2744 | 0.07  | 0.03 | 1.6E-02 | 0.45 |
| lipoprotein (a)                       | rs2954029 | 8  | 126560154 | TRIB1   | 2193 | -0.08 | 0.03 | 1.1E-02 | 0.45 |
| apo E                                 | rs2954029 | 8  | 126560154 | TRIB1   | 2262 | -0.02 | 0.03 | 5.2E-01 | 0.45 |
| remnant lipoprotein chol              | rs2954029 | 8  | 126560154 | TRIB1   | 2470 | -0.05 | 0.03 | 6.2E-02 | 0.45 |
| remnant lipoprotein triglycerides     | rs2954029 | 8  | 126560154 | TRIB1   | 2387 | -0.06 | 0.03 | 2.9E-02 | 0.46 |
| triglycerides exam 1                  | rs2954029 | 8  | 126560154 | TRIB1   | 3494 | -0.06 | 0.02 | 1.6E-02 | 0.44 |
| triglycerides/hdl ratio exam 1        | rs2954029 | 8  | 126560154 | TRIB1   | 3480 | -0.06 | 0.02 | 1.3E-02 | 0.44 |
| intermediate VLDL concentration - NMR | rs2954029 | 8  | 126560154 | TRIB1   | 2897 | -0.06 | 0.03 | 2.4E-02 | 0.45 |
| large VLDL concentration - NMR        | rs2954029 | 8  | 126560154 | TRIB1   | 2408 | -0.03 | 0.03 | 2.5E-01 | 0.45 |
| small VLDL concentration - NMR        | rs2954029 | 8  | 126560154 | TRIB1   | 2744 | -0.03 | 0.03 | 3.4E-01 | 0.45 |
| VLDL size - NMR                       | rs2954029 | 8  | 126560154 | TRIB1   | 2744 | -0.02 | 0.03 | 5.8E-01 | 0.45 |
| apo A-I                               | rs2967605 | 19 | 8375738   | ANGPTL4 | 3023 | -0.08 | 0.05 | 1.3E-01 | 0.16 |
| apo B                                 | rs2967605 | 19 | 8375738   | ANGPTL4 | 3023 | 0.09  | 0.05 | 8.2E-02 | 0.16 |
| apo C-III                             | rs2967605 | 19 | 8375738   | ANGPTL4 | 2486 | 0.02  | 0.06 | 7.7E-01 | 0.16 |
| total chol exam 1                     | rs2967605 | 19 | 8375738   | ANGPTL4 | 3496 | 0.02  | 0.05 | 6.7E-01 | 0.16 |
| total chol/hdl chol ratio exam 1      | rs2967605 | 19 | 8375738   | ANGPTL4 | 3481 | 0.12  | 0.05 | 1.6E-02 | 0.16 |
| hdl chol exam 1                       | rs2967605 | 19 | 8375738   | ANGPTL4 | 3495 | -0.11 | 0.05 | 2.1E-02 | 0.16 |
| hdl-2                                 | rs2967605 | 19 | 8375738   | ANGPTL4 | 3166 | -0.13 | 0.05 | 9.9E-03 | 0.16 |
| hdl-3                                 | rs2967605 | 19 | 8375738   | ANGPTL4 | 3009 | -0.16 | 0.05 | 3.8E-03 | 0.16 |
| intermediate HDL concentration - NMR  | rs2967605 | 19 | 8375738   | ANGPTL4 | 2744 | 0.03  | 0.06 | 5.9E-01 | 0.16 |
| large HDL concentration - NMR         | rs2967605 | 19 | 8375738   | ANGPTL4 | 2744 | -0.15 | 0.06 | 7.1E-03 | 0.16 |
| small HDL concentration - NMR         | rs2967605 | 19 | 8375738   | ANGPTL4 | 2744 | 0.01  | 0.06 | 8.9E-01 | 0.16 |
| HDL size - NMR                        | rs2967605 | 19 | 8375738   | ANGPTL4 | 2744 | -0.14 | 0.06 | 1.1E-02 | 0.16 |
| IDL concentration - NMR               | rs2967605 | 19 | 8375738   | ANGPTL4 | 2744 | 0.08  | 0.06 | 1.4E-01 | 0.16 |
| ldl chol exam 1                       | rs2967605 | 19 | 8375738   | ANGPTL4 | 3458 | 0.06  | 0.05 | 2.1E-01 | 0.16 |

|                                       |           |    |           |         |      |       |      |         |      |
|---------------------------------------|-----------|----|-----------|---------|------|-------|------|---------|------|
| large LDL concentration - NMR         | rs2967605 | 19 | 8375738   | ANGPTL4 | 2744 | -0.10 | 0.06 | 8.5E-02 | 0.16 |
| small LDL concentration - NMR         | rs2967605 | 19 | 8375738   | ANGPTL4 | 2744 | 0.14  | 0.06 | 1.2E-02 | 0.16 |
| LDL size - NMR                        | rs2967605 | 19 | 8375738   | ANGPTL4 | 2744 | -0.15 | 0.06 | 9.6E-03 | 0.16 |
| lipoprotein (a)                       | rs2967605 | 19 | 8375738   | ANGPTL4 | 2193 | -0.02 | 0.06 | 7.4E-01 | 0.16 |
| apo E                                 | rs2967605 | 19 | 8375738   | ANGPTL4 | 2262 | 0.05  | 0.06 | 3.9E-01 | 0.16 |
| remnant lipoprotein chol              | rs2967605 | 19 | 8375738   | ANGPTL4 | 2470 | 0.02  | 0.06 | 6.8E-01 | 0.16 |
| remnant lipoprotein triglycerides     | rs2967605 | 19 | 8375738   | ANGPTL4 | 2387 | -0.02 | 0.06 | 7.0E-01 | 0.16 |
| triglycerides exam 1                  | rs2967605 | 19 | 8375738   | ANGPTL4 | 3494 | 0.06  | 0.05 | 2.2E-01 | 0.16 |
| triglycerides/hdl ratio exam 1        | rs2967605 | 19 | 8375738   | ANGPTL4 | 3480 | 0.09  | 0.05 | 6.1E-02 | 0.16 |
| intermediate VLDL concentration - NMR | rs2967605 | 19 | 8375738   | ANGPTL4 | 2897 | 0.06  | 0.05 | 2.5E-01 | 0.16 |
| large VLDL concentration - NMR        | rs2967605 | 19 | 8375738   | ANGPTL4 | 2408 | -0.03 | 0.06 | 5.7E-01 | 0.16 |
| small VLDL concentration - NMR        | rs2967605 | 19 | 8375738   | ANGPTL4 | 2744 | -0.09 | 0.06 | 1.1E-01 | 0.16 |
| VLDL size - NMR                       | rs2967605 | 19 | 8375738   | ANGPTL4 | 2744 | 0.02  | 0.06 | 7.5E-01 | 0.16 |
| hdl chol exam 1                       | rs3798220 | 6  | 160881127 | LPA     | 3500 | -0.09 | 0.10 | 3.5E-01 | 0.02 |
| hdl-3                                 | rs3798220 | 6  | 160881127 | LPA     | 3010 | -0.12 | 0.11 | 2.8E-01 | 0.02 |
| hdl-2                                 | rs3798220 | 6  | 160881127 | LPA     | 3168 | -0.03 | 0.10 | 8.0E-01 | 0.02 |
| total chol exam 1                     | rs3798220 | 6  | 160881127 | LPA     | 3501 | 0.26  | 0.10 | 6.6E-03 | 0.02 |
| total chol/hdl chol ratio exam 1      | rs3798220 | 6  | 160881127 | LPA     | 3486 | 0.21  | 0.10 | 3.6E-02 | 0.02 |
| ldl chol exam 1                       | rs3798220 | 6  | 160881127 | LPA     | 3463 | 0.33  | 0.10 | 6.6E-04 | 0.02 |
| lipoprotein (a)                       | rs3798220 | 6  | 160881127 | LPA     | 2197 | 1.84  | 0.12 | 1.6E-49 | 0.02 |
| triglycerides exam 1                  | rs3798220 | 6  | 160881127 | LPA     | 3499 | 0.03  | 0.10 | 7.3E-01 | 0.02 |
| triglycerides/hdl ratio exam 1        | rs3798220 | 6  | 160881127 | LPA     | 3485 | 0.05  | 0.10 | 6.1E-01 | 0.02 |
| HDL size - NMR                        | rs3798220 | 6  | 160881127 | LPA     | 2745 | 0.03  | 0.11 | 7.6E-01 | 0.02 |
| LDL size - NMR                        | rs3798220 | 6  | 160881127 | LPA     | 2745 | 0.07  | 0.11 | 5.2E-01 | 0.02 |
| VLDL size - NMR                       | rs3798220 | 6  | 160881127 | LPA     | 2745 | -0.10 | 0.11 | 3.7E-01 | 0.02 |
| small HDL concentration - NMR         | rs3798220 | 6  | 160881127 | LPA     | 2745 | -0.01 | 0.11 | 9.1E-01 | 0.02 |
| intermediate HDL concentration - NMR  | rs3798220 | 6  | 160881127 | LPA     | 2745 | -0.08 | 0.11 | 4.9E-01 | 0.02 |
| large HDL concentration - NMR         | rs3798220 | 6  | 160881127 | LPA     | 2745 | -0.03 | 0.11 | 8.1E-01 | 0.02 |
| small LDL concentration - NMR         | rs3798220 | 6  | 160881127 | LPA     | 2745 | -0.02 | 0.11 | 8.3E-01 | 0.02 |
| large LDL concentration - NMR         | rs3798220 | 6  | 160881127 | LPA     | 2745 | 0.10  | 0.11 | 3.5E-01 | 0.02 |
| small VLDL concentration - NMR        | rs3798220 | 6  | 160881127 | LPA     | 2745 | 0.21  | 0.11 | 5.9E-02 | 0.02 |
| intermediate VLDL concentration - NMR | rs3798220 | 6  | 160881127 | LPA     | 2899 | -0.14 | 0.11 | 1.9E-01 | 0.02 |
| IDL concentration - NMR               | rs3798220 | 6  | 160881127 | LPA     | 2745 | -0.10 | 0.11 | 3.5E-01 | 0.02 |
| large VLDL concentration - NMR        | rs3798220 | 6  | 160881127 | LPA     | 2409 | 0.05  | 0.12 | 6.6E-01 | 0.02 |
| remnant lipoprotein chol              | rs3798220 | 6  | 160881127 | LPA     | 2472 | 0.20  | 0.12 | 1.1E-01 | 0.02 |
| remnant lipoprotein triglycerides     | rs3798220 | 6  | 160881127 | LPA     | 2388 | -0.02 | 0.12 | 8.5E-01 | 0.02 |
| apo E                                 | rs3798220 | 6  | 160881127 | LPA     | 2268 | 0.12  | 0.13 | 3.7E-01 | 0.02 |
| apo A-I                               | rs3798220 | 6  | 160881127 | LPA     | 3024 | -0.06 | 0.11 | 5.5E-01 | 0.02 |
| apo B                                 | rs3798220 | 6  | 160881127 | LPA     | 3024 | 0.22  | 0.11 | 3.8E-02 | 0.02 |
| apo C-III                             | rs3798220 | 6  | 160881127 | LPA     | 2490 | 0.01  | 0.11 | 9.1E-01 | 0.02 |
| apo A-I                               | rs3846663 | 5  | 74691482  | HMGCR   | 3023 | -0.08 | 0.03 | 5.0E-03 | 0.37 |
| apo B                                 | rs3846663 | 5  | 74691482  | HMGCR   | 3023 | 0.07  | 0.03 | 1.5E-02 | 0.37 |

|                                       |           |    |          |       |      |       |      |         |      |
|---------------------------------------|-----------|----|----------|-------|------|-------|------|---------|------|
| apo C-III                             | rs3846663 | 5  | 74691482 | HMGCR | 2486 | -0.02 | 0.03 | 5.4E-01 | 0.37 |
| total chol exam 1                     | rs3846663 | 5  | 74691482 | HMGCR | 3496 | 0.06  | 0.02 | 1.5E-02 | 0.37 |
| total chol/hdl chol ratio exam 1      | rs3846663 | 5  | 74691482 | HMGCR | 3481 | 0.04  | 0.02 | 1.1E-01 | 0.37 |
| hdl chol exam 1                       | rs3846663 | 5  | 74691482 | HMGCR | 3495 | 0.00  | 0.02 | 8.5E-01 | 0.37 |
| hdl-2                                 | rs3846663 | 5  | 74691482 | HMGCR | 3166 | -0.02 | 0.03 | 4.8E-01 | 0.38 |
| hdl-3                                 | rs3846663 | 5  | 74691482 | HMGCR | 3009 | -0.05 | 0.03 | 7.1E-02 | 0.37 |
| intermediate HDL concentration - NMR  | rs3846663 | 5  | 74691482 | HMGCR | 2744 | -0.07 | 0.03 | 9.7E-03 | 0.37 |
| large HDL concentration - NMR         | rs3846663 | 5  | 74691482 | HMGCR | 2744 | -0.03 | 0.03 | 3.4E-01 | 0.37 |
| small HDL concentration - NMR         | rs3846663 | 5  | 74691482 | HMGCR | 2744 | 0.04  | 0.03 | 1.2E-01 | 0.37 |
| HDL size - NMR                        | rs3846663 | 5  | 74691482 | HMGCR | 2744 | 0.00  | 0.03 | 9.0E-01 | 0.37 |
| IDL concentration - NMR               | rs3846663 | 5  | 74691482 | HMGCR | 2744 | 0.04  | 0.03 | 1.3E-01 | 0.37 |
| ldl chol exam 1                       | rs3846663 | 5  | 74691482 | HMGCR | 3458 | 0.07  | 0.02 | 2.9E-03 | 0.37 |
| large LDL concentration - NMR         | rs3846663 | 5  | 74691482 | HMGCR | 2744 | 0.04  | 0.03 | 2.1E-01 | 0.37 |
| small LDL concentration - NMR         | rs3846663 | 5  | 74691482 | HMGCR | 2744 | 0.05  | 0.03 | 1.1E-01 | 0.37 |
| LDL size - NMR                        | rs3846663 | 5  | 74691482 | HMGCR | 2744 | -0.02 | 0.03 | 5.5E-01 | 0.37 |
| lipoprotein (a)                       | rs3846663 | 5  | 74691482 | HMGCR | 2193 | 0.00  | 0.03 | 9.4E-01 | 0.38 |
| apo E                                 | rs3846663 | 5  | 74691482 | HMGCR | 2262 | 0.01  | 0.03 | 7.5E-01 | 0.37 |
| remnant lipoprotein chol              | rs3846663 | 5  | 74691482 | HMGCR | 2470 | 0.01  | 0.03 | 7.3E-01 | 0.37 |
| remnant lipoprotein triglycerides     | rs3846663 | 5  | 74691482 | HMGCR | 2387 | 0.02  | 0.03 | 5.3E-01 | 0.37 |
| triglycerides exam 1                  | rs3846663 | 5  | 74691482 | HMGCR | 3494 | -0.02 | 0.02 | 3.4E-01 | 0.37 |
| triglycerides/hdl ratio exam 1        | rs3846663 | 5  | 74691482 | HMGCR | 3480 | -0.02 | 0.02 | 4.6E-01 | 0.37 |
| intermediate VLDL concentration - NMR | rs3846663 | 5  | 74691482 | HMGCR | 2897 | 0.00  | 0.03 | 9.2E-01 | 0.38 |
| large VLDL concentration - NMR        | rs3846663 | 5  | 74691482 | HMGCR | 2408 | 0.02  | 0.03 | 5.4E-01 | 0.38 |
| small VLDL concentration - NMR        | rs3846663 | 5  | 74691482 | HMGCR | 2744 | 0.04  | 0.03 | 1.5E-01 | 0.37 |
| VLDL size - NMR                       | rs3846663 | 5  | 74691482 | HMGCR | 2744 | -0.01 | 0.03 | 6.5E-01 | 0.37 |
| apo A-I                               | rs4420638 | 19 | 50114786 | APOE  | 3023 | 0.25  | 0.09 | 4.9E-03 | 0.16 |
| apo B                                 | rs4420638 | 19 | 50114786 | APOE  | 3023 | 0.35  | 0.09 | 6.5E-05 | 0.16 |
| apo C-III                             | rs4420638 | 19 | 50114786 | APOE  | 2486 | 0.08  | 0.10 | 4.1E-01 | 0.16 |
| total chol exam 1                     | rs4420638 | 19 | 50114786 | APOE  | 3496 | 0.25  | 0.08 | 1.9E-03 | 0.16 |
| total chol/hdl chol ratio exam 1      | rs4420638 | 19 | 50114786 | APOE  | 3481 | 0.13  | 0.08 | 1.2E-01 | 0.16 |
| hdl chol exam 1                       | rs4420638 | 19 | 50114786 | APOE  | 3495 | 0.03  | 0.08 | 6.8E-01 | 0.16 |
| hdl-2                                 | rs4420638 | 19 | 50114786 | APOE  | 3166 | 0.03  | 0.09 | 7.3E-01 | 0.16 |
| hdl-3                                 | rs4420638 | 19 | 50114786 | APOE  | 3009 | 0.09  | 0.09 | 3.1E-01 | 0.16 |
| intermediate HDL concentration - NMR  | rs4420638 | 19 | 50114786 | APOE  | 2744 | 0.14  | 0.09 | 1.5E-01 | 0.16 |
| large HDL concentration - NMR         | rs4420638 | 19 | 50114786 | APOE  | 2744 | 0.11  | 0.09 | 2.4E-01 | 0.16 |
| small HDL concentration - NMR         | rs4420638 | 19 | 50114786 | APOE  | 2744 | -0.08 | 0.09 | 3.9E-01 | 0.16 |
| HDL size - NMR                        | rs4420638 | 19 | 50114786 | APOE  | 2744 | 0.11  | 0.09 | 2.5E-01 | 0.16 |
| IDL concentration - NMR               | rs4420638 | 19 | 50114786 | APOE  | 2744 | -0.06 | 0.09 | 5.0E-01 | 0.16 |
| ldl chol exam 1                       | rs4420638 | 19 | 50114786 | APOE  | 3458 | 0.25  | 0.08 | 1.7E-03 | 0.16 |
| large LDL concentration - NMR         | rs4420638 | 19 | 50114786 | APOE  | 2744 | 0.17  | 0.09 | 7.4E-02 | 0.16 |
| small LDL concentration - NMR         | rs4420638 | 19 | 50114786 | APOE  | 2744 | 0.08  | 0.09 | 4.1E-01 | 0.16 |
| LDL size - NMR                        | rs4420638 | 19 | 50114786 | APOE  | 2744 | 0.03  | 0.09 | 7.7E-01 | 0.16 |

|                                       |           |    |           |         |      |       |      |         |      |
|---------------------------------------|-----------|----|-----------|---------|------|-------|------|---------|------|
| lipoprotein (a)                       | rs4420638 | 19 | 50114786  | APOE    | 2193 | 0.07  | 0.10 | 5.2E-01 | 0.16 |
| apo E                                 | rs4420638 | 19 | 50114786  | APOE    | 2262 | -0.55 | 0.10 | 3.3E-08 | 0.16 |
| remnant lipoprotein chol              | rs4420638 | 19 | 50114786  | APOE    | 2470 | 0.12  | 0.10 | 2.2E-01 | 0.16 |
| remnant lipoprotein triglycerides     | rs4420638 | 19 | 50114786  | APOE    | 2387 | 0.21  | 0.10 | 3.5E-02 | 0.16 |
| triglycerides exam 1                  | rs4420638 | 19 | 50114786  | APOE    | 3494 | 0.09  | 0.08 | 2.6E-01 | 0.16 |
| triglycerides/hdl ratio exam 1        | rs4420638 | 19 | 50114786  | APOE    | 3480 | 0.07  | 0.08 | 4.2E-01 | 0.16 |
| intermediate VLDL concentration - NMR | rs4420638 | 19 | 50114786  | APOE    | 2897 | -0.01 | 0.09 | 8.8E-01 | 0.16 |
| large VLDL concentration - NMR        | rs4420638 | 19 | 50114786  | APOE    | 2408 | 0.00  | 0.10 | 9.9E-01 | 0.16 |
| small VLDL concentration - NMR        | rs4420638 | 19 | 50114786  | APOE    | 2744 | 0.01  | 0.09 | 9.1E-01 | 0.16 |
| VLDL size - NMR                       | rs4420638 | 19 | 50114786  | APOE    | 2744 | 0.08  | 0.09 | 4.0E-01 | 0.16 |
| apo A-I                               | rs471364  | 9  | 15279578  | C9orf52 | 3023 | -0.08 | 0.04 | 4.4E-02 | 0.12 |
| apo B                                 | rs471364  | 9  | 15279578  | C9orf52 | 3023 | 0.05  | 0.04 | 1.9E-01 | 0.12 |
| apo C-III                             | rs471364  | 9  | 15279578  | C9orf52 | 2486 | -0.02 | 0.04 | 5.9E-01 | 0.11 |
| total chol exam 1                     | rs471364  | 9  | 15279578  | C9orf52 | 3496 | 0.01  | 0.04 | 8.4E-01 | 0.12 |
| total chol/hdl chol ratio exam 1      | rs471364  | 9  | 15279578  | C9orf52 | 3481 | 0.11  | 0.04 | 4.7E-03 | 0.12 |
| hdl chol exam 1                       | rs471364  | 9  | 15279578  | C9orf52 | 3495 | -0.12 | 0.04 | 1.3E-03 | 0.12 |
| hdl-2                                 | rs471364  | 9  | 15279578  | C9orf52 | 3166 | -0.05 | 0.04 | 2.5E-01 | 0.12 |
| hdl-3                                 | rs471364  | 9  | 15279578  | C9orf52 | 3009 | -0.08 | 0.04 | 5.1E-02 | 0.12 |
| intermediate HDL concentration - NMR  | rs471364  | 9  | 15279578  | C9orf52 | 2744 | -0.01 | 0.04 | 8.6E-01 | 0.12 |
| large HDL concentration - NMR         | rs471364  | 9  | 15279578  | C9orf52 | 2744 | -0.07 | 0.04 | 7.6E-02 | 0.12 |
| small HDL concentration - NMR         | rs471364  | 9  | 15279578  | C9orf52 | 2744 | -0.02 | 0.04 | 5.8E-01 | 0.12 |
| HDL size - NMR                        | rs471364  | 9  | 15279578  | C9orf52 | 2744 | -0.08 | 0.04 | 4.2E-02 | 0.12 |
| IDL concentration - NMR               | rs471364  | 9  | 15279578  | C9orf52 | 2744 | 0.03  | 0.04 | 5.2E-01 | 0.12 |
| ldl chol exam 1                       | rs471364  | 9  | 15279578  | C9orf52 | 3458 | 0.06  | 0.04 | 1.1E-01 | 0.12 |
| large LDL concentration - NMR         | rs471364  | 9  | 15279578  | C9orf52 | 2744 | 0.02  | 0.04 | 6.3E-01 | 0.12 |
| small LDL concentration - NMR         | rs471364  | 9  | 15279578  | C9orf52 | 2744 | 0.02  | 0.04 | 5.8E-01 | 0.12 |
| LDL size - NMR                        | rs471364  | 9  | 15279578  | C9orf52 | 2744 | 0.00  | 0.04 | 9.6E-01 | 0.12 |
| lipoprotein (a)                       | rs471364  | 9  | 15279578  | C9orf52 | 2193 | 0.02  | 0.05 | 6.4E-01 | 0.12 |
| apo E                                 | rs471364  | 9  | 15279578  | C9orf52 | 2262 | -0.02 | 0.05 | 7.2E-01 | 0.11 |
| remnant lipoprotein chol              | rs471364  | 9  | 15279578  | C9orf52 | 2470 | 0.07  | 0.04 | 1.1E-01 | 0.12 |
| remnant lipoprotein triglycerides     | rs471364  | 9  | 15279578  | C9orf52 | 2387 | 0.11  | 0.04 | 1.7E-02 | 0.12 |
| triglycerides exam 1                  | rs471364  | 9  | 15279578  | C9orf52 | 3494 | -0.02 | 0.04 | 5.9E-01 | 0.12 |
| triglycerides/hdl ratio exam 1        | rs471364  | 9  | 15279578  | C9orf52 | 3480 | 0.03  | 0.04 | 5.0E-01 | 0.12 |
| intermediate VLDL concentration - NMR | rs471364  | 9  | 15279578  | C9orf52 | 2897 | 0.04  | 0.04 | 3.6E-01 | 0.12 |
| large VLDL concentration - NMR        | rs471364  | 9  | 15279578  | C9orf52 | 2408 | 0.07  | 0.04 | 9.9E-02 | 0.13 |
| small VLDL concentration - NMR        | rs471364  | 9  | 15279578  | C9orf52 | 2744 | -0.02 | 0.04 | 6.2E-01 | 0.12 |
| VLDL size - NMR                       | rs471364  | 9  | 15279578  | C9orf52 | 2744 | 0.05  | 0.04 | 2.7E-01 | 0.12 |
| apo A-I                               | rs4846914 | 1  | 228362314 | GALNT2  | 3023 | -0.03 | 0.03 | 2.2E-01 | 0.39 |
| apo B                                 | rs4846914 | 1  | 228362314 | GALNT2  | 3023 | 0.03  | 0.03 | 3.3E-01 | 0.39 |
| apo C-III                             | rs4846914 | 1  | 228362314 | GALNT2  | 2486 | 0.02  | 0.03 | 4.3E-01 | 0.39 |
| total chol exam 1                     | rs4846914 | 1  | 228362314 | GALNT2  | 3496 | 0.03  | 0.02 | 1.8E-01 | 0.40 |
| total chol/hdl chol ratio exam 1      | rs4846914 | 1  | 228362314 | GALNT2  | 3481 | 0.05  | 0.02 | 3.0E-02 | 0.40 |



|                                       |           |    |           |        |      |       |      |         |      |
|---------------------------------------|-----------|----|-----------|--------|------|-------|------|---------|------|
| hdl chol exam 1                       | rs4846914 | 1  | 228362314 | GALNT2 | 3495 | -0.04 | 0.02 | 1.2E-01 | 0.40 |
| hdl-2                                 | rs4846914 | 1  | 228362314 | GALNT2 | 3166 | -0.06 | 0.03 | 2.8E-02 | 0.40 |
| hdl-3                                 | rs4846914 | 1  | 228362314 | GALNT2 | 3009 | -0.04 | 0.03 | 1.8E-01 | 0.40 |
| intermediate HDL concentration - NMR  | rs4846914 | 1  | 228362314 | GALNT2 | 2744 | -0.03 | 0.03 | 2.9E-01 | 0.40 |
| large HDL concentration - NMR         | rs4846914 | 1  | 228362314 | GALNT2 | 2744 | -0.08 | 0.03 | 6.8E-03 | 0.40 |
| small HDL concentration - NMR         | rs4846914 | 1  | 228362314 | GALNT2 | 2744 | 0.04  | 0.03 | 1.4E-01 | 0.40 |
| HDL size - NMR                        | rs4846914 | 1  | 228362314 | GALNT2 | 2744 | -0.06 | 0.03 | 3.9E-02 | 0.40 |
| IDL concentration - NMR               | rs4846914 | 1  | 228362314 | GALNT2 | 2744 | 0.00  | 0.03 | 9.7E-01 | 0.40 |
| ldl chol exam 1                       | rs4846914 | 1  | 228362314 | GALNT2 | 3458 | 0.03  | 0.02 | 1.7E-01 | 0.40 |
| large LDL concentration - NMR         | rs4846914 | 1  | 228362314 | GALNT2 | 2744 | -0.04 | 0.03 | 1.8E-01 | 0.40 |
| small LDL concentration - NMR         | rs4846914 | 1  | 228362314 | GALNT2 | 2744 | 0.03  | 0.03 | 2.4E-01 | 0.40 |
| LDL size - NMR                        | rs4846914 | 1  | 228362314 | GALNT2 | 2744 | -0.08 | 0.03 | 7.0E-03 | 0.40 |
| lipoprotein (a)                       | rs4846914 | 1  | 228362314 | GALNT2 | 2193 | -0.03 | 0.03 | 2.8E-01 | 0.39 |
| apo E                                 | rs4846914 | 1  | 228362314 | GALNT2 | 2262 | -0.01 | 0.03 | 8.4E-01 | 0.40 |
| remnant lipoprotein chol              | rs4846914 | 1  | 228362314 | GALNT2 | 2470 | 0.03  | 0.03 | 2.6E-01 | 0.40 |
| remnant lipoprotein triglycerides     | rs4846914 | 1  | 228362314 | GALNT2 | 2387 | 0.02  | 0.03 | 5.1E-01 | 0.40 |
| triglycerides exam 1                  | rs4846914 | 1  | 228362314 | GALNT2 | 3494 | 0.03  | 0.02 | 1.6E-01 | 0.40 |
| triglycerides/hdl ratio exam 1        | rs4846914 | 1  | 228362314 | GALNT2 | 3480 | 0.04  | 0.02 | 9.1E-02 | 0.40 |
| intermediate VLDL concentration - NMR | rs4846914 | 1  | 228362314 | GALNT2 | 2897 | 0.04  | 0.03 | 1.2E-01 | 0.39 |
| large VLDL concentration - NMR        | rs4846914 | 1  | 228362314 | GALNT2 | 2408 | 0.04  | 0.03 | 2.2E-01 | 0.40 |
| small VLDL concentration - NMR        | rs4846914 | 1  | 228362314 | GALNT2 | 2744 | -0.03 | 0.03 | 3.4E-01 | 0.40 |
| VLDL size - NMR                       | rs4846914 | 1  | 228362314 | GALNT2 | 2744 | 0.04  | 0.03 | 1.4E-01 | 0.40 |
| apo A-I                               | rs4939883 | 18 | 45421212  | LIPG   | 3023 | -0.14 | 0.04 | 1.2E-04 | 0.17 |
| apo B                                 | rs4939883 | 18 | 45421212  | LIPG   | 3023 | 0.00  | 0.04 | 9.8E-01 | 0.17 |
| apo C-III                             | rs4939883 | 18 | 45421212  | LIPG   | 2486 | -0.09 | 0.04 | 2.5E-02 | 0.17 |
| total chol exam 1                     | rs4939883 | 18 | 45421212  | LIPG   | 3496 | -0.06 | 0.03 | 6.8E-02 | 0.17 |
| total chol/hdl chol ratio exam 1      | rs4939883 | 18 | 45421212  | LIPG   | 3481 | 0.08  | 0.03 | 1.0E-02 | 0.17 |
| hdl chol exam 1                       | rs4939883 | 18 | 45421212  | LIPG   | 3495 | -0.14 | 0.03 | 2.1E-05 | 0.17 |
| hdl-2                                 | rs4939883 | 18 | 45421212  | LIPG   | 3166 | -0.13 | 0.03 | 2.5E-04 | 0.17 |
| hdl-3                                 | rs4939883 | 18 | 45421212  | LIPG   | 3009 | -0.15 | 0.04 | 3.3E-05 | 0.17 |
| intermediate HDL concentration - NMR  | rs4939883 | 18 | 45421212  | LIPG   | 2744 | -0.08 | 0.04 | 4.0E-02 | 0.17 |
| large HDL concentration - NMR         | rs4939883 | 18 | 45421212  | LIPG   | 2744 | -0.15 | 0.04 | 8.1E-05 | 0.17 |
| small HDL concentration - NMR         | rs4939883 | 18 | 45421212  | LIPG   | 2744 | 0.06  | 0.04 | 9.0E-02 | 0.17 |
| HDL size - NMR                        | rs4939883 | 18 | 45421212  | LIPG   | 2744 | -0.12 | 0.04 | 1.2E-03 | 0.17 |
| IDL concentration - NMR               | rs4939883 | 18 | 45421212  | LIPG   | 2744 | 0.01  | 0.04 | 8.5E-01 | 0.17 |
| ldl chol exam 1                       | rs4939883 | 18 | 45421212  | LIPG   | 3458 | -0.01 | 0.03 | 7.9E-01 | 0.17 |
| large LDL concentration - NMR         | rs4939883 | 18 | 45421212  | LIPG   | 2744 | -0.02 | 0.04 | 5.1E-01 | 0.17 |
| small LDL concentration - NMR         | rs4939883 | 18 | 45421212  | LIPG   | 2744 | 0.05  | 0.04 | 2.0E-01 | 0.17 |
| LDL size - NMR                        | rs4939883 | 18 | 45421212  | LIPG   | 2744 | -0.05 | 0.04 | 1.5E-01 | 0.17 |
| lipoprotein (a)                       | rs4939883 | 18 | 45421212  | LIPG   | 2193 | 0.00  | 0.04 | 9.6E-01 | 0.17 |
| apo E                                 | rs4939883 | 18 | 45421212  | LIPG   | 2262 | -0.02 | 0.04 | 6.6E-01 | 0.16 |
| remnant lipoprotein chol              | rs4939883 | 18 | 45421212  | LIPG   | 2470 | -0.04 | 0.04 | 2.5E-01 | 0.16 |

|                                       |           |    |          |      |      |       |      |         |      |
|---------------------------------------|-----------|----|----------|------|------|-------|------|---------|------|
| remnant lipoprotein triglycerides     | rs4939883 | 18 | 45421212 | LIPG | 2387 | -0.03 | 0.04 | 5.0E-01 | 0.16 |
| triglycerides exam 1                  | rs4939883 | 18 | 45421212 | LIPG | 3494 | 0.00  | 0.03 | 9.9E-01 | 0.17 |
| triglycerides/hdl ratio exam 1        | rs4939883 | 18 | 45421212 | LIPG | 3480 | 0.05  | 0.03 | 1.6E-01 | 0.17 |
| intermediate VLDL concentration - NMR | rs4939883 | 18 | 45421212 | LIPG | 2897 | -0.02 | 0.04 | 6.2E-01 | 0.17 |
| large VLDL concentration - NMR        | rs4939883 | 18 | 45421212 | LIPG | 2408 | 0.00  | 0.04 | 9.9E-01 | 0.17 |
| small VLDL concentration - NMR        | rs4939883 | 18 | 45421212 | LIPG | 2744 | 0.01  | 0.04 | 7.3E-01 | 0.17 |
| VLDL size - NMR                       | rs4939883 | 18 | 45421212 | LIPG | 2744 | 0.00  | 0.04 | 9.8E-01 | 0.17 |
| apo A-I                               | rs515135  | 2  | 21139562 | APOB | 3023 | 0.01  | 0.03 | 7.5E-01 | 0.20 |
| apo B                                 | rs515135  | 2  | 21139562 | APOB | 3023 | -0.16 | 0.03 | 9.6E-07 | 0.20 |
| apo C-III                             | rs515135  | 2  | 21139562 | APOB | 2486 | -0.01 | 0.04 | 7.9E-01 | 0.20 |
| total chol exam 1                     | rs515135  | 2  | 21139562 | APOB | 3496 | -0.12 | 0.03 | 7.5E-05 | 0.20 |
| total chol/hdl chol ratio exam 1      | rs515135  | 2  | 21139562 | APOB | 3481 | -0.10 | 0.03 | 6.1E-04 | 0.20 |
| hdl chol exam 1                       | rs515135  | 2  | 21139562 | APOB | 3495 | 0.04  | 0.03 | 2.3E-01 | 0.20 |
| hdl-2                                 | rs515135  | 2  | 21139562 | APOB | 3166 | 0.00  | 0.03 | 9.6E-01 | 0.20 |
| hdl-3                                 | rs515135  | 2  | 21139562 | APOB | 3009 | 0.04  | 0.03 | 2.0E-01 | 0.20 |
| intermediate HDL concentration - NMR  | rs515135  | 2  | 21139562 | APOB | 2744 | 0.03  | 0.03 | 4.1E-01 | 0.20 |
| large HDL concentration - NMR         | rs515135  | 2  | 21139562 | APOB | 2744 | 0.00  | 0.03 | 9.6E-01 | 0.20 |
| small HDL concentration - NMR         | rs515135  | 2  | 21139562 | APOB | 2744 | 0.01  | 0.03 | 7.9E-01 | 0.20 |
| HDL size - NMR                        | rs515135  | 2  | 21139562 | APOB | 2744 | -0.02 | 0.03 | 4.7E-01 | 0.20 |
| IDL concentration - NMR               | rs515135  | 2  | 21139562 | APOB | 2744 | -0.03 | 0.03 | 4.5E-01 | 0.20 |
| ldl chol exam 1                       | rs515135  | 2  | 21139562 | APOB | 3458 | -0.14 | 0.03 | 5.1E-06 | 0.20 |
| large LDL concentration - NMR         | rs515135  | 2  | 21139562 | APOB | 2744 | -0.11 | 0.03 | 1.0E-03 | 0.20 |
| small LDL concentration - NMR         | rs515135  | 2  | 21139562 | APOB | 2744 | -0.07 | 0.03 | 3.7E-02 | 0.20 |
| LDL size - NMR                        | rs515135  | 2  | 21139562 | APOB | 2744 | -0.01 | 0.03 | 6.6E-01 | 0.20 |
| lipoprotein (a)                       | rs515135  | 2  | 21139562 | APOB | 2193 | -0.01 | 0.04 | 7.5E-01 | 0.20 |
| apo E                                 | rs515135  | 2  | 21139562 | APOB | 2262 | -0.03 | 0.04 | 3.9E-01 | 0.20 |
| remnant lipoprotein chol              | rs515135  | 2  | 21139562 | APOB | 2470 | -0.04 | 0.04 | 2.5E-01 | 0.20 |
| remnant lipoprotein triglycerides     | rs515135  | 2  | 21139562 | APOB | 2387 | -0.02 | 0.04 | 5.9E-01 | 0.20 |
| triglycerides exam 1                  | rs515135  | 2  | 21139562 | APOB | 3494 | -0.03 | 0.03 | 4.0E-01 | 0.20 |
| triglycerides/hdl ratio exam 1        | rs515135  | 2  | 21139562 | APOB | 3480 | -0.03 | 0.03 | 2.8E-01 | 0.20 |
| intermediate VLDL concentration - NMR | rs515135  | 2  | 21139562 | APOB | 2897 | 0.01  | 0.03 | 7.1E-01 | 0.20 |
| large VLDL concentration - NMR        | rs515135  | 2  | 21139562 | APOB | 2408 | -0.06 | 0.04 | 1.2E-01 | 0.20 |
| small VLDL concentration - NMR        | rs515135  | 2  | 21139562 | APOB | 2744 | -0.08 | 0.03 | 1.3E-02 | 0.20 |
| VLDL size - NMR                       | rs515135  | 2  | 21139562 | APOB | 2744 | 0.00  | 0.03 | 9.1E-01 | 0.20 |
| apo A-I                               | rs6511720 | 19 | 11063306 | LDLR | 3023 | 0.06  | 0.07 | 4.0E-01 | 0.10 |
| apo B                                 | rs6511720 | 19 | 11063306 | LDLR | 3023 | -0.11 | 0.07 | 1.0E-01 | 0.10 |
| apo C-III                             | rs6511720 | 19 | 11063306 | LDLR | 2486 | 0.08  | 0.07 | 2.9E-01 | 0.10 |
| total chol exam 1                     | rs6511720 | 19 | 11063306 | LDLR | 3496 | -0.22 | 0.06 | 3.4E-04 | 0.10 |
| total chol/hdl chol ratio exam 1      | rs6511720 | 19 | 11063306 | LDLR | 3481 | -0.17 | 0.06 | 5.4E-03 | 0.10 |
| hdl chol exam 1                       | rs6511720 | 19 | 11063306 | LDLR | 3495 | 0.05  | 0.06 | 3.9E-01 | 0.10 |
| hdl-2                                 | rs6511720 | 19 | 11063306 | LDLR | 3166 | 0.11  | 0.07 | 1.0E-01 | 0.10 |
| hdl-3                                 | rs6511720 | 19 | 11063306 | LDLR | 3009 | 0.14  | 0.07 | 4.4E-02 | 0.10 |

|                                       |           |    |          |       |      |       |      |         |      |
|---------------------------------------|-----------|----|----------|-------|------|-------|------|---------|------|
| intermediate HDL concentration - NMR  | rs6511720 | 19 | 11063306 | LDLR  | 2744 | 0.03  | 0.07 | 6.6E-01 | 0.10 |
| large HDL concentration - NMR         | rs6511720 | 19 | 11063306 | LDLR  | 2744 | 0.06  | 0.07 | 3.9E-01 | 0.10 |
| small HDL concentration - NMR         | rs6511720 | 19 | 11063306 | LDLR  | 2744 | -0.06 | 0.07 | 4.3E-01 | 0.10 |
| HDL size - NMR                        | rs6511720 | 19 | 11063306 | LDLR  | 2744 | 0.07  | 0.07 | 3.0E-01 | 0.10 |
| IDL concentration - NMR               | rs6511720 | 19 | 11063306 | LDLR  | 2744 | -0.11 | 0.07 | 1.0E-01 | 0.10 |
| ldl chol exam 1                       | rs6511720 | 19 | 11063306 | LDLR  | 3458 | -0.22 | 0.06 | 3.0E-04 | 0.10 |
| large LDL concentration - NMR         | rs6511720 | 19 | 11063306 | LDLR  | 2744 | -0.08 | 0.07 | 2.5E-01 | 0.10 |
| small LDL concentration - NMR         | rs6511720 | 19 | 11063306 | LDLR  | 2744 | -0.08 | 0.07 | 2.7E-01 | 0.10 |
| LDL size - NMR                        | rs6511720 | 19 | 11063306 | LDLR  | 2744 | 0.00  | 0.07 | 9.9E-01 | 0.10 |
| lipoprotein (a)                       | rs6511720 | 19 | 11063306 | LDLR  | 2193 | 0.08  | 0.07 | 2.9E-01 | 0.10 |
| apo E                                 | rs6511720 | 19 | 11063306 | LDLR  | 2262 | -0.03 | 0.08 | 7.1E-01 | 0.10 |
| remnant lipoprotein chol              | rs6511720 | 19 | 11063306 | LDLR  | 2470 | -0.06 | 0.07 | 4.4E-01 | 0.10 |
| remnant lipoprotein triglycerides     | rs6511720 | 19 | 11063306 | LDLR  | 2387 | -0.04 | 0.08 | 6.4E-01 | 0.10 |
| triglycerides exam 1                  | rs6511720 | 19 | 11063306 | LDLR  | 3494 | -0.03 | 0.06 | 5.8E-01 | 0.10 |
| triglycerides/hdl ratio exam 1        | rs6511720 | 19 | 11063306 | LDLR  | 3480 | -0.04 | 0.06 | 4.8E-01 | 0.10 |
| intermediate VLDL concentration - NMR | rs6511720 | 19 | 11063306 | LDLR  | 2897 | 0.01  | 0.07 | 8.6E-01 | 0.10 |
| large VLDL concentration - NMR        | rs6511720 | 19 | 11063306 | LDLR  | 2408 | 0.03  | 0.08 | 6.9E-01 | 0.10 |
| small VLDL concentration - NMR        | rs6511720 | 19 | 11063306 | LDLR  | 2744 | 0.01  | 0.07 | 8.9E-01 | 0.10 |
| VLDL size - NMR                       | rs6511720 | 19 | 11063306 | LDLR  | 2744 | 0.04  | 0.07 | 5.6E-01 | 0.10 |
| apo A-I                               | rs6544713 | 2  | 43927385 | ABCG8 | 3023 | -0.01 | 0.03 | 6.3E-01 | 0.31 |
| apo B                                 | rs6544713 | 2  | 43927385 | ABCG8 | 3023 | 0.12  | 0.03 | 9.6E-05 | 0.31 |
| apo C-III                             | rs6544713 | 2  | 43927385 | ABCG8 | 2486 | -0.03 | 0.03 | 3.8E-01 | 0.31 |
| total chol exam 1                     | rs6544713 | 2  | 43927385 | ABCG8 | 3496 | 0.12  | 0.03 | 1.0E-05 | 0.32 |
| total chol/hdl chol ratio exam 1      | rs6544713 | 2  | 43927385 | ABCG8 | 3481 | 0.08  | 0.03 | 3.9E-03 | 0.32 |
| hdl chol exam 1                       | rs6544713 | 2  | 43927385 | ABCG8 | 3495 | -0.02 | 0.03 | 4.9E-01 | 0.32 |
| hdl-2                                 | rs6544713 | 2  | 43927385 | ABCG8 | 3166 | -0.06 | 0.03 | 5.4E-02 | 0.31 |
| hdl-3                                 | rs6544713 | 2  | 43927385 | ABCG8 | 3009 | 0.02  | 0.03 | 6.0E-01 | 0.31 |
| intermediate HDL concentration - NMR  | rs6544713 | 2  | 43927385 | ABCG8 | 2744 | -0.03 | 0.03 | 4.2E-01 | 0.31 |
| large HDL concentration - NMR         | rs6544713 | 2  | 43927385 | ABCG8 | 2744 | -0.01 | 0.03 | 7.3E-01 | 0.31 |
| small HDL concentration - NMR         | rs6544713 | 2  | 43927385 | ABCG8 | 2744 | 0.07  | 0.03 | 2.8E-02 | 0.31 |
| HDL size - NMR                        | rs6544713 | 2  | 43927385 | ABCG8 | 2744 | -0.03 | 0.03 | 2.6E-01 | 0.31 |
| IDL concentration - NMR               | rs6544713 | 2  | 43927385 | ABCG8 | 2744 | 0.08  | 0.03 | 7.7E-03 | 0.31 |
| ldl chol exam 1                       | rs6544713 | 2  | 43927385 | ABCG8 | 3458 | 0.12  | 0.03 | 5.2E-06 | 0.32 |
| large LDL concentration - NMR         | rs6544713 | 2  | 43927385 | ABCG8 | 2744 | 0.06  | 0.03 | 4.1E-02 | 0.31 |
| small LDL concentration - NMR         | rs6544713 | 2  | 43927385 | ABCG8 | 2744 | 0.08  | 0.03 | 1.1E-02 | 0.31 |
| LDL size - NMR                        | rs6544713 | 2  | 43927385 | ABCG8 | 2744 | 0.00  | 0.03 | 9.9E-01 | 0.31 |
| lipoprotein (a)                       | rs6544713 | 2  | 43927385 | ABCG8 | 2193 | 0.03  | 0.03 | 4.0E-01 | 0.31 |
| apo E                                 | rs6544713 | 2  | 43927385 | ABCG8 | 2262 | 0.06  | 0.03 | 7.8E-02 | 0.31 |
| remnant lipoprotein chol              | rs6544713 | 2  | 43927385 | ABCG8 | 2470 | 0.05  | 0.03 | 1.1E-01 | 0.31 |
| remnant lipoprotein triglycerides     | rs6544713 | 2  | 43927385 | ABCG8 | 2387 | 0.04  | 0.03 | 2.1E-01 | 0.31 |
| triglycerides exam 1                  | rs6544713 | 2  | 43927385 | ABCG8 | 3494 | 0.02  | 0.03 | 4.2E-01 | 0.32 |
| triglycerides/hdl ratio exam 1        | rs6544713 | 2  | 43927385 | ABCG8 | 3480 | 0.02  | 0.03 | 4.0E-01 | 0.32 |

|                                       |           |   |          |        |      |       |      |         |      |
|---------------------------------------|-----------|---|----------|--------|------|-------|------|---------|------|
| intermediate VLDL concentration - NMR | rs6544713 | 2 | 43927385 | ABCG8  | 2897 | 0.01  | 0.03 | 7.8E-01 | 0.31 |
| large VLDL concentration - NMR        | rs6544713 | 2 | 43927385 | ABCG8  | 2408 | 0.01  | 0.03 | 7.5E-01 | 0.31 |
| small VLDL concentration - NMR        | rs6544713 | 2 | 43927385 | ABCG8  | 2744 | 0.00  | 0.03 | 9.8E-01 | 0.31 |
| VLDL size - NMR                       | rs6544713 | 2 | 43927385 | ABCG8  | 2744 | -0.01 | 0.03 | 8.5E-01 | 0.31 |
| apo A-I                               | rs714052  | 7 | 72502805 | MLXIPL | 3023 | 0.09  | 0.04 | 3.2E-02 | 0.12 |
| apo B                                 | rs714052  | 7 | 72502805 | MLXIPL | 3023 | 0.00  | 0.04 | 9.2E-01 | 0.12 |
| apo C-III                             | rs714052  | 7 | 72502805 | MLXIPL | 2486 | -0.15 | 0.04 | 4.9E-04 | 0.12 |
| total chol exam 1                     | rs714052  | 7 | 72502805 | MLXIPL | 3496 | -0.03 | 0.04 | 4.6E-01 | 0.12 |
| total chol/hdl chol ratio exam 1      | rs714052  | 7 | 72502805 | MLXIPL | 3481 | -0.05 | 0.04 | 2.2E-01 | 0.11 |
| hdl chol exam 1                       | rs714052  | 7 | 72502805 | MLXIPL | 3495 | 0.04  | 0.04 | 3.2E-01 | 0.11 |
| hdl-2                                 | rs714052  | 7 | 72502805 | MLXIPL | 3166 | 0.11  | 0.04 | 8.7E-03 | 0.11 |
| hdl-3                                 | rs714052  | 7 | 72502805 | MLXIPL | 3009 | 0.05  | 0.04 | 1.9E-01 | 0.12 |
| intermediate HDL concentration - NMR  | rs714052  | 7 | 72502805 | MLXIPL | 2744 | 0.00  | 0.04 | 9.4E-01 | 0.12 |
| large HDL concentration - NMR         | rs714052  | 7 | 72502805 | MLXIPL | 2744 | 0.08  | 0.04 | 5.9E-02 | 0.12 |
| small HDL concentration - NMR         | rs714052  | 7 | 72502805 | MLXIPL | 2744 | -0.05 | 0.04 | 2.1E-01 | 0.12 |
| HDL size - NMR                        | rs714052  | 7 | 72502805 | MLXIPL | 2744 | 0.12  | 0.04 | 7.1E-03 | 0.12 |
| IDL concentration - NMR               | rs714052  | 7 | 72502805 | MLXIPL | 2744 | -0.07 | 0.04 | 8.4E-02 | 0.12 |
| ldl chol exam 1                       | rs714052  | 7 | 72502805 | MLXIPL | 3458 | -0.01 | 0.04 | 8.4E-01 | 0.11 |
| large LDL concentration - NMR         | rs714052  | 7 | 72502805 | MLXIPL | 2744 | 0.08  | 0.04 | 7.4E-02 | 0.12 |
| small LDL concentration - NMR         | rs714052  | 7 | 72502805 | MLXIPL | 2744 | -0.08 | 0.04 | 8.0E-02 | 0.12 |
| LDL size - NMR                        | rs714052  | 7 | 72502805 | MLXIPL | 2744 | 0.09  | 0.04 | 3.1E-02 | 0.12 |
| lipoprotein (a)                       | rs714052  | 7 | 72502805 | MLXIPL | 2193 | 0.01  | 0.05 | 8.7E-01 | 0.11 |
| apo E                                 | rs714052  | 7 | 72502805 | MLXIPL | 2262 | -0.05 | 0.05 | 2.6E-01 | 0.12 |
| remnant lipoprotein chol              | rs714052  | 7 | 72502805 | MLXIPL | 2470 | -0.08 | 0.05 | 8.0E-02 | 0.12 |
| remnant lipoprotein triglycerides     | rs714052  | 7 | 72502805 | MLXIPL | 2387 | -0.09 | 0.05 | 5.8E-02 | 0.12 |
| triglycerides exam 1                  | rs714052  | 7 | 72502805 | MLXIPL | 3494 | -0.10 | 0.04 | 1.0E-02 | 0.11 |
| triglycerides/hdl ratio exam 1        | rs714052  | 7 | 72502805 | MLXIPL | 3480 | -0.10 | 0.04 | 1.2E-02 | 0.11 |
| intermediate VLDL concentration - NMR | rs714052  | 7 | 72502805 | MLXIPL | 2897 | -0.14 | 0.04 | 6.3E-04 | 0.12 |
| large VLDL concentration - NMR        | rs714052  | 7 | 72502805 | MLXIPL | 2408 | -0.08 | 0.05 | 1.0E-01 | 0.11 |
| small VLDL concentration - NMR        | rs714052  | 7 | 72502805 | MLXIPL | 2744 | 0.05  | 0.04 | 2.0E-01 | 0.12 |
| VLDL size - NMR                       | rs714052  | 7 | 72502805 | MLXIPL | 2744 | -0.09 | 0.04 | 3.8E-02 | 0.12 |
| apo A-I                               | rs7557067 | 2 | 21061717 | APOB   | 3023 | 0.05  | 0.03 | 1.5E-01 | 0.22 |
| apo B                                 | rs7557067 | 2 | 21061717 | APOB   | 3023 | -0.12 | 0.03 | 1.4E-04 | 0.22 |
| apo C-III                             | rs7557067 | 2 | 21061717 | APOB   | 2486 | -0.04 | 0.03 | 2.8E-01 | 0.22 |
| total chol exam 1                     | rs7557067 | 2 | 21061717 | APOB   | 3496 | -0.07 | 0.03 | 1.0E-02 | 0.22 |
| total chol/hdl chol ratio exam 1      | rs7557067 | 2 | 21061717 | APOB   | 3481 | -0.08 | 0.03 | 7.8E-03 | 0.22 |
| hdl chol exam 1                       | rs7557067 | 2 | 21061717 | APOB   | 3495 | 0.05  | 0.03 | 7.2E-02 | 0.22 |
| hdl-2                                 | rs7557067 | 2 | 21061717 | APOB   | 3166 | 0.09  | 0.03 | 3.5E-03 | 0.22 |
| hdl-3                                 | rs7557067 | 2 | 21061717 | APOB   | 3009 | 0.06  | 0.03 | 5.4E-02 | 0.22 |
| intermediate HDL concentration - NMR  | rs7557067 | 2 | 21061717 | APOB   | 2744 | 0.03  | 0.03 | 4.4E-01 | 0.22 |
| large HDL concentration - NMR         | rs7557067 | 2 | 21061717 | APOB   | 2744 | 0.07  | 0.03 | 3.3E-02 | 0.22 |
| small HDL concentration - NMR         | rs7557067 | 2 | 21061717 | APOB   | 2744 | -0.06 | 0.03 | 9.4E-02 | 0.22 |

|                                       |           |    |          |      |      |       |      |         |      |
|---------------------------------------|-----------|----|----------|------|------|-------|------|---------|------|
| HDL size - NMR                        | rs7557067 | 2  | 21061717 | APOB | 2744 | 0.07  | 0.03 | 2.4E-02 | 0.22 |
| IDL concentration - NMR               | rs7557067 | 2  | 21061717 | APOB | 2744 | -0.06 | 0.03 | 5.5E-02 | 0.22 |
| ldl chol exam 1                       | rs7557067 | 2  | 21061717 | APOB | 3458 | -0.07 | 0.03 | 1.6E-02 | 0.22 |
| large LDL concentration - NMR         | rs7557067 | 2  | 21061717 | APOB | 2744 | 0.00  | 0.03 | 8.9E-01 | 0.22 |
| small LDL concentration - NMR         | rs7557067 | 2  | 21061717 | APOB | 2744 | -0.09 | 0.03 | 5.1E-03 | 0.22 |
| LDL size - NMR                        | rs7557067 | 2  | 21061717 | APOB | 2744 | 0.08  | 0.03 | 2.0E-02 | 0.22 |
| lipoprotein (a)                       | rs7557067 | 2  | 21061717 | APOB | 2193 | -0.04 | 0.04 | 2.7E-01 | 0.22 |
| apo E                                 | rs7557067 | 2  | 21061717 | APOB | 2262 | -0.03 | 0.04 | 4.9E-01 | 0.22 |
| remnant lipoprotein chol              | rs7557067 | 2  | 21061717 | APOB | 2470 | -0.07 | 0.03 | 3.5E-02 | 0.22 |
| remnant lipoprotein triglycerides     | rs7557067 | 2  | 21061717 | APOB | 2387 | -0.08 | 0.04 | 2.0E-02 | 0.22 |
| triglycerides exam 1                  | rs7557067 | 2  | 21061717 | APOB | 3494 | -0.10 | 0.03 | 6.2E-04 | 0.22 |
| triglycerides/hdl ratio exam 1        | rs7557067 | 2  | 21061717 | APOB | 3480 | -0.10 | 0.03 | 1.0E-03 | 0.22 |
| intermediate VLDL concentration - NMR | rs7557067 | 2  | 21061717 | APOB | 2897 | -0.10 | 0.03 | 2.3E-03 | 0.22 |
| large VLDL concentration - NMR        | rs7557067 | 2  | 21061717 | APOB | 2408 | -0.03 | 0.04 | 4.2E-01 | 0.22 |
| small VLDL concentration - NMR        | rs7557067 | 2  | 21061717 | APOB | 2744 | -0.09 | 0.03 | 7.0E-03 | 0.22 |
| VLDL size - NMR                       | rs7557067 | 2  | 21061717 | APOB | 2744 | -0.01 | 0.03 | 7.9E-01 | 0.22 |
| apo A-I                               | rs7679    | 20 | 44009909 | PLTP | 3023 | 0.04  | 0.03 | 2.4E-01 | 0.18 |
| apo B                                 | rs7679    | 20 | 44009909 | PLTP | 3023 | 0.02  | 0.03 | 5.8E-01 | 0.18 |
| apo C-III                             | rs7679    | 20 | 44009909 | PLTP | 2486 | -0.03 | 0.04 | 3.8E-01 | 0.18 |
| total chol exam 1                     | rs7679    | 20 | 44009909 | PLTP | 3496 | 0.05  | 0.03 | 1.2E-01 | 0.18 |
| total chol/hdl chol ratio exam 1      | rs7679    | 20 | 44009909 | PLTP | 3481 | 0.08  | 0.03 | 1.1E-02 | 0.18 |
| hdl chol exam 1                       | rs7679    | 20 | 44009909 | PLTP | 3495 | -0.08 | 0.03 | 1.7E-02 | 0.18 |
| hdl-2                                 | rs7679    | 20 | 44009909 | PLTP | 3166 | -0.11 | 0.03 | 1.1E-03 | 0.18 |
| hdl-3                                 | rs7679    | 20 | 44009909 | PLTP | 3009 | -0.01 | 0.03 | 8.2E-01 | 0.18 |
| intermediate HDL concentration - NMR  | rs7679    | 20 | 44009909 | PLTP | 2744 | 0.34  | 0.04 | 2.6E-21 | 0.18 |
| large HDL concentration - NMR         | rs7679    | 20 | 44009909 | PLTP | 2744 | -0.17 | 0.04 | 2.1E-06 | 0.18 |
| small HDL concentration - NMR         | rs7679    | 20 | 44009909 | PLTP | 2744 | -0.08 | 0.04 | 2.3E-02 | 0.18 |
| HDL size - NMR                        | rs7679    | 20 | 44009909 | PLTP | 2744 | -0.15 | 0.04 | 4.1E-05 | 0.18 |
| IDL concentration - NMR               | rs7679    | 20 | 44009909 | PLTP | 2744 | -0.02 | 0.04 | 6.5E-01 | 0.18 |
| ldl chol exam 1                       | rs7679    | 20 | 44009909 | PLTP | 3458 | 0.05  | 0.03 | 1.3E-01 | 0.18 |
| large LDL concentration - NMR         | rs7679    | 20 | 44009909 | PLTP | 2744 | -0.05 | 0.04 | 1.7E-01 | 0.18 |
| small LDL concentration - NMR         | rs7679    | 20 | 44009909 | PLTP | 2744 | 0.05  | 0.04 | 1.6E-01 | 0.18 |
| LDL size - NMR                        | rs7679    | 20 | 44009909 | PLTP | 2744 | -0.05 | 0.04 | 1.9E-01 | 0.18 |
| lipoprotein (a)                       | rs7679    | 20 | 44009909 | PLTP | 2193 | 0.02  | 0.04 | 5.8E-01 | 0.18 |
| apo E                                 | rs7679    | 20 | 44009909 | PLTP | 2262 | -0.03 | 0.04 | 3.9E-01 | 0.18 |
| remnant lipoprotein chol              | rs7679    | 20 | 44009909 | PLTP | 2470 | 0.05  | 0.04 | 1.5E-01 | 0.18 |
| remnant lipoprotein triglycerides     | rs7679    | 20 | 44009909 | PLTP | 2387 | 0.07  | 0.04 | 7.9E-02 | 0.18 |
| triglycerides exam 1                  | rs7679    | 20 | 44009909 | PLTP | 3494 | 0.09  | 0.03 | 5.3E-03 | 0.18 |
| triglycerides/hdl ratio exam 1        | rs7679    | 20 | 44009909 | PLTP | 3480 | 0.09  | 0.03 | 3.0E-03 | 0.18 |
| intermediate VLDL concentration - NMR | rs7679    | 20 | 44009909 | PLTP | 2897 | 0.05  | 0.03 | 1.2E-01 | 0.18 |
| large VLDL concentration - NMR        | rs7679    | 20 | 44009909 | PLTP | 2408 | 0.07  | 0.04 | 8.4E-02 | 0.19 |
| small VLDL concentration - NMR        | rs7679    | 20 | 44009909 | PLTP | 2744 | -0.02 | 0.04 | 6.1E-01 | 0.18 |

|                                       |           |    |          |               |      |       |      |         |      |
|---------------------------------------|-----------|----|----------|---------------|------|-------|------|---------|------|
| VLDL size - NMR                       | rs7679    | 20 | 44009909 | PLTP          | 2744 | 0.07  | 0.04 | 5.7E-02 | 0.18 |
| apo A-I                               | rs7819412 | 8  | 11082571 | XKR6, AMAC1L2 | 3023 | 0.00  | 0.03 | 9.0E-01 | 0.48 |
| apo B                                 | rs7819412 | 8  | 11082571 | XKR6, AMAC1L2 | 3023 | 0.01  | 0.03 | 5.9E-01 | 0.48 |
| apo C-III                             | rs7819412 | 8  | 11082571 | XKR6, AMAC1L2 | 2486 | -0.04 | 0.03 | 1.9E-01 | 0.48 |
| total chol exam 1                     | rs7819412 | 8  | 11082571 | XKR6, AMAC1L2 | 3496 | 0.02  | 0.02 | 4.2E-01 | 0.48 |
| total chol/hdl chol ratio exam 1      | rs7819412 | 8  | 11082571 | XKR6, AMAC1L2 | 3481 | -0.01 | 0.02 | 5.9E-01 | 0.48 |
| hdl chol exam 1                       | rs7819412 | 8  | 11082571 | XKR6, AMAC1L2 | 3495 | 0.03  | 0.02 | 2.5E-01 | 0.48 |
| hdl-2                                 | rs7819412 | 8  | 11082571 | XKR6, AMAC1L2 | 3166 | -0.03 | 0.03 | 1.8E-01 | 0.48 |
| hdl-3                                 | rs7819412 | 8  | 11082571 | XKR6, AMAC1L2 | 3009 | -0.01 | 0.03 | 6.4E-01 | 0.48 |
| intermediate HDL concentration - NMR  | rs7819412 | 8  | 11082571 | XKR6, AMAC1L2 | 2744 | -0.02 | 0.03 | 4.3E-01 | 0.48 |
| large HDL concentration - NMR         | rs7819412 | 8  | 11082571 | XKR6, AMAC1L2 | 2744 | 0.00  | 0.03 | 9.3E-01 | 0.48 |
| small HDL concentration - NMR         | rs7819412 | 8  | 11082571 | XKR6, AMAC1L2 | 2744 | -0.04 | 0.03 | 1.9E-01 | 0.48 |
| HDL size - NMR                        | rs7819412 | 8  | 11082571 | XKR6, AMAC1L2 | 2744 | -0.01 | 0.03 | 8.5E-01 | 0.48 |
| IDL concentration - NMR               | rs7819412 | 8  | 11082571 | XKR6, AMAC1L2 | 2744 | -0.02 | 0.03 | 4.1E-01 | 0.48 |
| ldl chol exam 1                       | rs7819412 | 8  | 11082571 | XKR6, AMAC1L2 | 3458 | 0.00  | 0.02 | 8.6E-01 | 0.48 |
| large LDL concentration - NMR         | rs7819412 | 8  | 11082571 | XKR6, AMAC1L2 | 2744 | -0.03 | 0.03 | 2.8E-01 | 0.48 |
| small LDL concentration - NMR         | rs7819412 | 8  | 11082571 | XKR6, AMAC1L2 | 2744 | 0.01  | 0.03 | 6.3E-01 | 0.48 |
| LDL size - NMR                        | rs7819412 | 8  | 11082571 | XKR6, AMAC1L2 | 2744 | -0.03 | 0.03 | 2.9E-01 | 0.48 |
| lipoprotein (a)                       | rs7819412 | 8  | 11082571 | XKR6, AMAC1L2 | 2193 | -0.03 | 0.03 | 3.7E-01 | 0.48 |
| apo E                                 | rs7819412 | 8  | 11082571 | XKR6, AMAC1L2 | 2262 | -0.01 | 0.03 | 8.6E-01 | 0.48 |
| remnant lipoprotein chol              | rs7819412 | 8  | 11082571 | XKR6, AMAC1L2 | 2470 | 0.01  | 0.03 | 8.1E-01 | 0.48 |
| remnant lipoprotein triglycerides     | rs7819412 | 8  | 11082571 | XKR6, AMAC1L2 | 2387 | 0.00  | 0.03 | 9.3E-01 | 0.48 |
| triglycerides exam 1                  | rs7819412 | 8  | 11082571 | XKR6, AMAC1L2 | 3494 | -0.03 | 0.02 | 2.3E-01 | 0.48 |
| triglycerides/hdl ratio exam 1        | rs7819412 | 8  | 11082571 | XKR6, AMAC1L2 | 3480 | -0.03 | 0.02 | 1.6E-01 | 0.48 |
| intermediate VLDL concentration - NMR | rs7819412 | 8  | 11082571 | XKR6, AMAC1L2 | 2897 | -0.05 | 0.03 | 6.6E-02 | 0.48 |
| large VLDL concentration - NMR        | rs7819412 | 8  | 11082571 | XKR6, AMAC1L2 | 2408 | -0.03 | 0.03 | 4.0E-01 | 0.48 |
| small VLDL concentration - NMR        | rs7819412 | 8  | 11082571 | XKR6, AMAC1L2 | 2744 | -0.07 | 0.03 | 7.5E-03 | 0.48 |
| VLDL size - NMR                       | rs7819412 | 8  | 11082571 | XKR6, AMAC1L2 | 2744 | -0.03 | 0.03 | 3.3E-01 | 0.48 |
| apo A-I                               | rs6102059 | 20 | 38662198 | MAFB          | 3023 | 0.02  | 0.03 | 0.48    | 0.31 |
| apo B                                 | rs6102059 | 20 | 38662198 | MAFB          | 3023 | -0.08 | 0.03 | 0.00    | 0.31 |
| apo C-III                             | rs6102059 | 20 | 38662198 | MAFB          | 2486 | -0.02 | 0.03 | 0.42    | 0.31 |
| total chol exam 1                     | rs6102059 | 20 | 38662198 | MAFB          | 3496 | -0.09 | 0.03 | 0.00    | 0.31 |
| total chol/hdl chol ratio exam 1      | rs6102059 | 20 | 38662198 | MAFB          | 3481 | -0.04 | 0.03 | 0.16    | 0.31 |
| hdl chol exam 1                       | rs6102059 | 20 | 38662198 | MAFB          | 3495 | -0.02 | 0.03 | 0.46    | 0.31 |
| hdl-2                                 | rs6102059 | 20 | 38662198 | MAFB          | 3176 | 0.02  | 0.03 | 0.45    | 0.31 |
| hdl-3                                 | rs6102059 | 20 | 38662198 | MAFB          | 2902 | 0.01  | 0.03 | 0.80    | 0.32 |
| intermediate HDL concentration - NMR  | rs6102059 | 20 | 38662198 | MAFB          | 2744 | 0.02  | 0.03 | 0.48    | 0.31 |
| large HDL concentration - NMR         | rs6102059 | 20 | 38662198 | MAFB          | 2744 | 0.03  | 0.03 | 0.30    | 0.31 |
| small HDL concentration - NMR         | rs6102059 | 20 | 38662198 | MAFB          | 2744 | -0.06 | 0.03 | 0.05    | 0.31 |

|                                       |           |    |           |       |      |       |      |         |      |
|---------------------------------------|-----------|----|-----------|-------|------|-------|------|---------|------|
| HDL size - NMR                        | rs6102059 | 20 | 38662198  | MAFB  | 2744 | 0.03  | 0.03 | 0.34    | 0.31 |
| IDL concentration - NMR               | rs6102059 | 20 | 38662198  | MAFB  | 2744 | -0.06 | 0.03 | 0.05    | 0.31 |
| ldl chol exam 1                       | rs6102059 | 20 | 38662198  | MAFB  | 3458 | -0.09 | 0.03 | 0.00    | 0.31 |
| large LDL concentration - NMR         | rs6102059 | 20 | 38662198  | MAFB  | 2744 | -0.01 | 0.03 | 0.64    | 0.31 |
| small LDL concentration - NMR         | rs6102059 | 20 | 38662198  | MAFB  | 2744 | -0.08 | 0.03 | 0.01    | 0.31 |
| LDL size - NMR                        | rs6102059 | 20 | 38662198  | MAFB  | 2744 | 0.03  | 0.03 | 0.33    | 0.31 |
| lipoprotein (a)                       | rs6102059 | 20 | 38662198  | MAFB  | 2193 | 0.01  | 0.03 | 0.85    | 0.32 |
| apo E                                 | rs6102059 | 20 | 38662198  | MAFB  | 2262 | -0.02 | 0.03 | 0.62    | 0.32 |
| remnant lipoprotein chol              | rs6102059 | 20 | 38662198  | MAFB  | 2470 | 0.02  | 0.03 | 0.52    | 0.31 |
| remnant lipoprotein triglycerides     | rs6102059 | 20 | 38662198  | MAFB  | 2387 | 0.04  | 0.03 | 0.20    | 0.31 |
| triglycerides exam 1                  | rs6102059 | 20 | 38662198  | MAFB  | 3494 | -0.02 | 0.03 | 0.45    | 0.31 |
| triglycerides/hdl ratio exam 1        | rs6102059 | 20 | 38662198  | MAFB  | 3480 | -0.01 | 0.03 | 0.71    | 0.31 |
| intermediate VLDL concentration - NMR | rs6102059 | 20 | 38662198  | MAFB  | 2897 | -0.04 | 0.03 | 0.14    | 0.31 |
| large VLDL concentration - NMR        | rs6102059 | 20 | 38662198  | MAFB  | 2408 | 0.03  | 0.03 | 0.29    | 0.31 |
| small VLDL concentration - NMR        | rs6102059 | 20 | 38662198  | MAFB  | 2744 | -0.06 | 0.03 | 0.05    | 0.31 |
| VLDL size - NMR                       | rs6102059 | 20 | 38662198  | MAFB  | 2744 | 0.04  | 0.03 | 0.16    | 0.31 |
| apo A-I                               | rs964184  | 11 | 116154127 | APOA5 | 3023 | -0.03 | 0.04 | 4.0E-01 | 0.14 |
| apo B                                 | rs964184  | 11 | 116154127 | APOA5 | 3023 | 0.14  | 0.04 | 1.6E-04 | 0.14 |
| apo C-III                             | rs964184  | 11 | 116154127 | APOA5 | 2486 | 0.14  | 0.04 | 1.1E-03 | 0.13 |
| total chol exam 1                     | rs964184  | 11 | 116154127 | APOA5 | 3496 | 0.10  | 0.03 | 3.4E-03 | 0.14 |
| total chol/hdl chol ratio exam 1      | rs964184  | 11 | 116154127 | APOA5 | 3481 | 0.20  | 0.03 | 9.2E-09 | 0.14 |
| hdl chol exam 1                       | rs964184  | 11 | 116154127 | APOA5 | 3495 | -0.16 | 0.03 | 2.9E-06 | 0.14 |
| hdl-2                                 | rs964184  | 11 | 116154127 | APOA5 | 3166 | -0.17 | 0.04 | 3.6E-06 | 0.14 |
| hdl-3                                 | rs964184  | 11 | 116154127 | APOA5 | 3009 | -0.14 | 0.04 | 3.3E-04 | 0.14 |
| intermediate HDL concentration - NMR  | rs964184  | 11 | 116154127 | APOA5 | 2744 | 0.07  | 0.04 | 9.1E-02 | 0.14 |
| large HDL concentration - NMR         | rs964184  | 11 | 116154127 | APOA5 | 2744 | -0.14 | 0.04 | 8.4E-04 | 0.14 |
| small HDL concentration - NMR         | rs964184  | 11 | 116154127 | APOA5 | 2744 | 0.02  | 0.04 | 5.9E-01 | 0.14 |
| HDL size - NMR                        | rs964184  | 11 | 116154127 | APOA5 | 2744 | -0.10 | 0.04 | 1.6E-02 | 0.14 |
| IDL concentration - NMR               | rs964184  | 11 | 116154127 | APOA5 | 2744 | 0.06  | 0.04 | 1.5E-01 | 0.14 |
| ldl chol exam 1                       | rs964184  | 11 | 116154127 | APOA5 | 3458 | 0.08  | 0.03 | 1.5E-02 | 0.14 |
| large LDL concentration - NMR         | rs964184  | 11 | 116154127 | APOA5 | 2744 | -0.08 | 0.04 | 3.7E-02 | 0.14 |
| small LDL concentration - NMR         | rs964184  | 11 | 116154127 | APOA5 | 2744 | 0.18  | 0.04 | 8.6E-06 | 0.14 |
| LDL size - NMR                        | rs964184  | 11 | 116154127 | APOA5 | 2744 | -0.16 | 0.04 | 1.3E-04 | 0.14 |
| lipoprotein (a)                       | rs964184  | 11 | 116154127 | APOA5 | 2193 | 0.02  | 0.04 | 6.4E-01 | 0.14 |
| apo E                                 | rs964184  | 11 | 116154127 | APOA5 | 2262 | 0.05  | 0.04 | 2.2E-01 | 0.14 |
| remnant lipoprotein chol              | rs964184  | 11 | 116154127 | APOA5 | 2470 | 0.19  | 0.04 | 1.0E-05 | 0.14 |
| remnant lipoprotein triglycerides     | rs964184  | 11 | 116154127 | APOA5 | 2387 | 0.19  | 0.04 | 6.4E-06 | 0.14 |
| triglycerides exam 1                  | rs964184  | 11 | 116154127 | APOA5 | 3494 | 0.23  | 0.03 | 6.4E-11 | 0.14 |

|                                       |          |    |           |       |      |      |      |         |      |
|---------------------------------------|----------|----|-----------|-------|------|------|------|---------|------|
| triglycerides/hdl ratio exam 1        | rs964184 | 11 | 116154127 | APOA5 | 3480 | 0.24 | 0.03 | 5.2E-12 | 0.14 |
| intermediate VLDL concentration - NMR | rs964184 | 11 | 116154127 | APOA5 | 2897 | 0.29 | 0.04 | 4.3E-14 | 0.14 |
| large VLDL concentration - NMR        | rs964184 | 11 | 116154127 | APOA5 | 2408 | 0.11 | 0.04 | 8.9E-03 | 0.14 |
| small VLDL concentration - NMR        | rs964184 | 11 | 116154127 | APOA5 | 2744 | 0.12 | 0.04 | 2.4E-03 | 0.14 |
| VLDL size - NMR                       | rs964184 | 11 | 116154127 | APOA5 | 2744 | 0.05 | 0.04 | 2.5E-01 | 0.14 |

---
